# Supplementary material
Source: Copernicus journal article supplement (doi:10.5194/jm-45-487-2026)
Supplement: Supplementary file 2 [file Table S1.pdf › Table S1.pdf]

[illegible]



[illegible]
