# Supplementary material
Source: Copernicus journal article supplement (doi:10.5194/jm-45-487-2026)
Supplement: Supplementary file 3 [file Table S2.pdf › Table S2.pdf]

Distribution Chart of Benthic Foraminifera (Genus)

| Transitional | Inner Neritic | Middle Neritic | Outer Neritic | Upper Bathyal | Lower Bathyal | Sample Code    | <i>Adelosina</i> | <i>Alveolinella</i> | <i>Ammobaculites</i> | <i>Ammonia</i> | <i>Amphicoryna</i> | <i>Amplistegina</i> | <i>Anomalina</i> | <i>Astacolus</i> | <i>Asterorotalia</i> | <i>Baculogypsinioides</i> | <i>Baggina</i> | <i>Bigenerina</i> | <i>Bolivina</i> | <i>Bolivinita</i> | <i>Bombulina</i> | <i>Brizalina</i> | <i>Bulinina</i> | <i>Calcarina</i> | <i>Cancris</i> | <i>Cassidulina</i> | <i>Cellanthus</i> | <i>Ceratobulimina</i> | <i>Ceratocancris</i> | <i>Cibicides</i> | <i>Dentalina</i> | <i>Discorbina</i> |
|--------------|---------------|----------------|---------------|---------------|---------------|----------------|------------------|---------------------|----------------------|----------------|--------------------|---------------------|------------------|------------------|----------------------|---------------------------|----------------|-------------------|-----------------|-------------------|------------------|------------------|-----------------|------------------|----------------|--------------------|-------------------|-----------------------|----------------------|------------------|------------------|-------------------|
|              |               |                |               |               |               | P.Bembang      |                  |                     |                      | 346            |                    | 38                  |                  |                  | 8                    |                           |                |                   |                 |                   |                  |                  |                 | 46               |                |                    | 18                |                       |                      |                  |                  |                   |
|              |               |                |               |               |               | P. Parangireng |                  |                     |                      | 304            |                    | 4979                |                  |                  |                      |                           |                |                   |                 |                   |                  |                  |                 | 272              |                |                    | 48                |                       |                      |                  |                  |                   |
|              |               |                |               |               |               | SSTH1          | 214              |                     |                      | 23615          |                    | 214                 |                  |                  | 8896                 |                           | 107            |                   |                 |                   |                  |                  |                 |                  |                |                    | 107               |                       |                      | 855              |                  |                   |
|              |               |                |               |               |               | SSTH2          |                  |                     | 994                  | 12157          |                    | 117                 | 409              |                  |                      |                           |                |                   |                 |                   |                  | 351              | 117             |                  |                |                    |                   |                       |                      | 526              |                  |                   |
|              |               |                |               |               |               | sem-A9         |                  |                     |                      | 355            |                    |                     | 4                |                  | 8                    |                           |                |                   |                 | 4                 |                  | 45               | 23              |                  |                | 8                  |                   |                       |                      | 30               |                  |                   |
|              |               |                |               |               |               | sem-A21        |                  |                     |                      | 820            |                    |                     |                  |                  |                      |                           |                |                   |                 |                   |                  | 518              | 15              |                  |                | 15                 |                   |                       |                      | 85               |                  |                   |
|              |               |                |               |               |               | sem-A11        |                  |                     | 69                   | 1300           |                    |                     | 10               |                  | 49                   |                           |                |                   |                 |                   |                  | 108              | 25              |                  |                |                    |                   |                       |                      |                  |                  |                   |
|              |               |                |               |               |               | sem-A6         |                  |                     | 41                   | 5084           |                    |                     |                  |                  | 984                  |                           |                |                   | 41              |                   |                  | 1353             | 328             |                  |                |                    |                   |                       |                      | 533              |                  |                   |
|              |               |                |               |               |               | sem-A5         |                  |                     | 41                   | 3747           |                    |                     | 41               |                  | 559                  |                           |                |                   |                 |                   |                  | 704              | 104             |                  |                |                    |                   |                       |                      |                  |                  |                   |
|              |               |                |               |               |               | SSTH8          | 13               |                     | 32                   | 233            |                    | 19                  |                  |                  | 39                   |                           |                |                   |                 |                   |                  | 161              | 6               | 6                | 6              |                    | 6                 |                       |                      | 362              |                  |                   |
|              |               |                |               |               |               | IKN 01         |                  |                     |                      | 5              |                    |                     |                  |                  |                      |                           |                |                   |                 |                   | 1                | 3                |                 |                  | 1              |                    |                   |                       |                      | 24               |                  |                   |
|              |               |                |               |               |               | SS10           |                  |                     |                      | 16             |                    |                     | 2                |                  | 3                    |                           |                |                   |                 |                   | 1                | 16               |                 |                  | 2              |                    |                   |                       |                      | 7                |                  |                   |
|              |               |                |               |               |               | SS09           | 1                |                     |                      | 62             |                    | 2                   | 1                |                  | 3                    |                           | 2              |                   |                 |                   |                  | 41               | 1               |                  |                |                    |                   |                       |                      | 63               |                  |                   |
|              |               |                |               |               |               | IKN 03         |                  | 1                   | 1                    | 3              |                    | 28                  | 1                | 1                |                      | 1                         |                |                   | 1               |                   |                  | 38               | 1               | 1                |                | 1                  |                   |                       |                      | 34               |                  |                   |
|              |               |                |               |               |               | CLP 03         |                  |                     |                      | 29             | 3                  | 5                   | 5                |                  |                      |                           |                |                   |                 |                   |                  | 60               | 10              |                  |                |                    |                   |                       |                      | 96               |                  |                   |
|              |               |                |               |               |               | GC05           |                  |                     |                      | 540            | 13                 |                     | 13               |                  |                      |                           |                |                   |                 |                   |                  | 2221             |                 |                  |                | 63                 |                   |                       |                      | 100              |                  |                   |
|              |               |                |               |               |               | CLP 05         |                  |                     |                      | 196            | 65                 | 11                  | 11               |                  |                      |                           |                |                   |                 |                   |                  | 498              | 76              |                  |                | 11                 |                   |                       |                      | 109              | 11               |                   |
|              |               |                |               |               |               | CLP 06         |                  |                     |                      | 1              | 1                  | 3                   |                  |                  |                      |                           |                |                   |                 |                   |                  | 27               | 7               |                  |                |                    |                   |                       |                      | 7                |                  |                   |
|              |               |                |               |               |               | CLP 07         |                  |                     |                      | 2              | 1                  | 1                   |                  |                  |                      |                           |                |                   |                 |                   |                  | 7                | 1               |                  |                | 1                  |                   |                       |                      | 1                |                  |                   |
|              |               |                |               |               |               | IKN 04         |                  |                     |                      | 239            |                    | 9088                |                  |                  |                      |                           |                |                   | 1196            |                   |                  | 53571            |                 | 478              |                | 478                | 478               |                       |                      | 8610             |                  |                   |
|              |               |                |               |               |               | IKN 05         |                  |                     |                      | 1              | 1                  | 1                   |                  |                  |                      |                           |                |                   |                 |                   |                  | 2                | 1               |                  |                | 1                  |                   |                       |                      | 8                | 1                |                   |
|              |               |                |               |               |               | Sim ST-14      |                  |                     | 1537                 |                |                    |                     | 512              |                  |                      |                           |                |                   |                 |                   |                  | 12804            | 1024            |                  |                | 1024               |                   |                       |                      | 2049             | 2049             | 512               |
|              |               |                |               |               |               | Sum ST-09      |                  |                     |                      | 1025           |                    |                     | 513              | 513              |                      |                           | 513            | 513               | 3075            |                   |                  | 18447            | 4100            |                  |                | 2050               |                   |                       |                      | 1538             | 513              |                   |
|              |               |                |               |               |               | Sum ST-01      |                  |                     | 512                  | 2048           |                    |                     | 1536             |                  |                      |                           | 512            |                   |                 | 2048              |                  | 4609             | 4609            |                  |                | 512                |                   |                       |                      | 1024             | 1024             |                   |
|              |               |                |               |               |               | Sum ST-12      |                  |                     |                      | 64             |                    |                     | 128              |                  |                      |                           |                |                   |                 |                   | 128              |                  | 192             |                  |                |                    |                   |                       |                      |                  |                  |                   |
|              |               |                |               |               |               | Sum ST-06      |                  |                     |                      |                |                    | 512                 |                  |                  |                      | 256                       |                |                   |                 | 1281              |                  | 2305             | 1281            |                  |                |                    | 1281              |                       |                      | 1793             | 768              |                   |
|              |               |                |               |               |               | OS1            |                  |                     |                      |                | 3591               |                     | 3078             |                  |                      |                           |                |                   |                 |                   | 2565             | 3078             | 2565            |                  |                |                    |                   |                       |                      | 3073             | 1026             |                   |
|              |               |                |               |               |               | Sum ST-13      |                  |                     |                      |                |                    | 1024                |                  |                  |                      |                           |                |                   |                 |                   | 1280             | 512              | 256             |                  |                |                    |                   | 768                   |                      | 768              | 256              |                   |
|              |               |                |               |               |               | Sum ST-03      |                  |                     |                      |                |                    |                     | 16               |                  |                      |                           |                |                   |                 |                   |                  | 32               | 144             |                  |                |                    |                   |                       | 8                    |                  |                  |                   |
|              |               |                |               |               |               | Sum ST-11      |                  |                     |                      |                | 1024               |                     | 512              | 512              |                      |                           |                |                   |                 |                   |                  | 2048             | 1536            |                  | 1024           |                    |                   |                       |                      | 3073             | 3073             |                   |
|              |               |                |               |               |               | OS10           |                  |                     |                      |                |                    | 512                 |                  |                  |                      |                           |                |                   |                 |                   |                  | 512              | 512             |                  |                |                    |                   |                       |                      | 512              |                  |                   |
|              |               |                |               |               |               | Sim ST-02      |                  |                     |                      |                |                    |                     | 2                |                  |                      |                           |                |                   |                 |                   |                  |                  |                 |                  |                |                    |                   |                       |                      |                  | 2                |                   |
|              |               |                |               |               |               | Sim ST-08      |                  |                     |                      |                |                    |                     |                  |                  |                      |                           |                |                   |                 |                   |                  |                  | 80              |                  |                |                    |                   |                       |                      |                  |                  |                   |
|              |               |                |               |               |               | Sum ST-08      |                  |                     |                      |                |                    |                     |                  |                  |                      |                           |                |                   |                 |                   |                  |                  | 14              |                  |                |                    |                   |                       |                      | 4                | 1                |                   |
|              |               |                |               |               |               | OS7            |                  |                     |                      |                |                    |                     |                  |                  |                      |                           |                |                   |                 |                   |                  |                  |                 |                  |                |                    |                   |                       |                      | 8                |                  |                   |
|              |               |                |               |               |               |                | 228              | 1                   | 3227                 | 52191          | 4698               | 14504               | 8842             | 1025             | 10549                | 1                         | 877            | 513               | 1750            | 10381             | 2                | 104071           | 17029           | 804              | 1033           | 4164               | 658               | 2049                  | 8                    | 25293            | 8724             | 512               |

| Transitional | Inner Neritic | Middle Neritic | Outer Neritic | Upper Bathyal | Lower Bathyal | Sample Code    | <i>Discorbis</i> | <i>Edentostomina</i> | <i>Eggerella</i> | <i>Elphidium</i> | <i>Eponides</i> | <i>Fissurina</i> | <i>Florilus</i> | <i>Glandulina</i> | <i>Globobulimina</i> | <i>Globocassidulina</i> | <i>Guttulina</i> | <i>Gyroldina</i> | <i>Haplophragmoides</i> | <i>Hemirobulina</i> | <i>Heterolepa</i> | <i>Hoeglundina</i> | <i>Hyalinea</i> | <i>Lagena</i> | <i>Laticarinina</i> | <i>Lenticulina</i> | <i>Lingulina</i> | <i>Marginulina</i> | <i>Martinottiella</i> | <i>Massilia</i> | <i>Miliolinella</i> | <i>Neovigierina</i> | <i>Nodosaria</i> | <i>Nonion</i> | <i>Nonionella</i> | <i>Oolina</i> |    |      |      |      |    |    |      |
|--------------|---------------|----------------|---------------|---------------|---------------|----------------|------------------|----------------------|------------------|------------------|-----------------|------------------|-----------------|-------------------|----------------------|-------------------------|------------------|------------------|-------------------------|---------------------|-------------------|--------------------|-----------------|---------------|---------------------|--------------------|------------------|--------------------|-----------------------|-----------------|---------------------|---------------------|------------------|---------------|-------------------|---------------|----|------|------|------|----|----|------|
|              |               |                |               |               |               | P.Bembang      |                  |                      |                  | 138              |                 |                  |                 |                   |                      |                         |                  |                  |                         |                     |                   |                    |                 |               |                     |                    |                  |                    |                       |                 |                     |                     |                  |               |                   |               |    |      |      |      |    |    |      |
|              |               |                |               |               |               | P. Parangireng |                  |                      |                  |                  |                 |                  |                 |                   |                      |                         |                  |                  |                         |                     |                   |                    |                 |               |                     |                    |                  |                    |                       |                 |                     |                     |                  |               |                   |               |    |      |      |      |    |    |      |
|              |               |                |               |               |               | SSTH1          |                  |                      |                  | 5236             |                 |                  |                 |                   |                      |                         |                  |                  |                         |                     |                   |                    |                 |               |                     |                    |                  |                    |                       |                 |                     |                     |                  |               |                   |               |    |      |      |      |    |    |      |
|              |               |                |               |               |               | SSTH2          |                  | 117                  |                  | 1227             |                 | 234              | 58              |                   |                      |                         |                  |                  |                         |                     |                   |                    | 526             |               |                     |                    |                  |                    |                       |                 |                     |                     |                  |               |                   | 409           |    |      |      |      | 58 |    |      |
|              |               |                |               |               |               | sem-A9         |                  | 4                    |                  | 72               |                 | 4                |                 |                   |                      |                         |                  |                  |                         |                     |                   |                    |                 |               |                     |                    |                  | 8                  | 4                     |                 |                     |                     |                  |               |                   |               |    |      | 19   |      |    |    |      |
|              |               |                |               |               |               | sem-A21        |                  |                      |                  | 31               |                 |                  |                 |                   |                      |                         |                  |                  |                         |                     |                   |                    |                 |               |                     |                    |                  |                    |                       |                 |                     |                     |                  |               |                   |               |    | 39   |      |      |    |    |      |
|              |               |                |               |               |               | sem-A11        |                  |                      |                  | 129              |                 |                  | 35              |                   |                      |                         |                  |                  |                         |                     |                   |                    |                 | 15            |                     |                    |                  |                    |                       |                 |                     |                     |                  |               |                   |               |    |      | 5    |      |    |    |      |
|              |               |                |               |               |               | sem-A6         |                  |                      |                  | 2419             |                 |                  | 861             |                   |                      |                         |                  |                  |                         |                     |                   |                    |                 | 82            |                     |                    |                  |                    |                       |                 |                     |                     |                  |               |                   |               |    |      |      |      | 41 |    |      |
|              |               |                |               |               |               | sem-A5         |                  |                      |                  | 559              |                 | 62               | 1263            |                   |                      |                         |                  |                  |                         |                     |                   |                    |                 | 124           |                     |                    |                  |                    | 41                    |                 |                     |                     |                  |               |                   |               |    |      |      |      |    | 21 |      |
|              |               |                |               |               |               | SSTH8          | 6                |                      |                  | 103              |                 | 13               | 26              |                   |                      |                         |                  |                  |                         |                     |                   |                    |                 |               |                     |                    |                  |                    | 19                    |                 |                     |                     |                  |               |                   |               | 19 | 32   | 78   |      | 13 |    |      |
|              |               |                |               |               |               | IKN 01         |                  |                      |                  | 2                |                 | 1                |                 |                   |                      |                         |                  |                  |                         |                     |                   |                    |                 |               |                     | 9                  |                  |                    |                       | 1               |                     |                     |                  |               |                   |               | 1  |      | 1    | 1    | 1  |    |      |
|              |               |                |               |               |               | SS10           |                  |                      |                  | 2                |                 | 1                |                 |                   |                      |                         |                  |                  |                         |                     |                   |                    |                 |               |                     |                    |                  |                    |                       | 2               |                     |                     |                  |               |                   |               | 6  | 2    | 12   | 1    | 2  |    |      |
|              |               |                |               |               |               | SS09           |                  |                      |                  | 1                |                 | 9                |                 |                   |                      |                         |                  |                  |                         |                     |                   |                    |                 |               |                     |                    |                  |                    |                       | 10              |                     |                     |                  |               |                   |               |    | 2    | 9    |      |    |    |      |
|              |               |                |               |               |               | IKN 03         |                  |                      |                  | 6                |                 |                  |                 |                   | 1                    |                         |                  |                  |                         |                     |                   |                    |                 | 1             |                     |                    | 26               |                    |                       | 1               | 1                   |                     | 2                |               |                   |               |    | 4    | 1    |      |    |    |      |
|              |               |                |               |               |               | CLP 03         |                  | 3                    |                  |                  |                 | 5                |                 |                   |                      |                         |                  |                  |                         |                     |                   |                    | 3               | 23            |                     |                    |                  |                    | 3                     | 13              |                     | 16                  |                  |               |                   |               | 3  | 18   | 5    |      |    |    |      |
|              |               |                |               |               |               | GC05           |                  |                      |                  |                  |                 |                  |                 |                   |                      |                         |                  |                  |                         |                     |                   |                    |                 |               |                     |                    |                  |                    |                       | 25              |                     | 50                  |                  |               |                   |               |    | 1029 |      | 13   |    |    |      |
|              |               |                |               |               |               | CLP 05         |                  |                      |                  |                  | 22              | 11               |                 |                   |                      |                         |                  |                  |                         |                     |                   |                    |                 | 22            |                     | 22                 | 33               |                    |                       | 54              |                     | 43                  |                  |               |                   |               |    | 22   | 65   | 43   |    |    |      |
|              |               |                |               |               |               | CLP 06         |                  |                      |                  |                  |                 | 1                |                 |                   |                      |                         |                  |                  |                         |                     |                   |                    |                 | 2             |                     |                    |                  |                    |                       | 1               |                     | 7                   |                  |               |                   |               |    | 1    | 2    | 2    |    |    |      |
|              |               |                |               |               |               | CLP 07         |                  |                      |                  |                  |                 |                  |                 |                   |                      |                         |                  |                  |                         |                     |                   |                    |                 | 1             |                     |                    |                  |                    |                       | 1               |                     | 3                   |                  |               |                   |               |    | 1    | 2    | 1    |    |    |      |
|              |               |                |               |               |               | IKN 04         |                  |                      |                  |                  |                 |                  |                 |                   |                      |                         |                  |                  |                         |                     |                   |                    |                 | 5740          |                     |                    | 478              |                    |                       |                 |                     | 478                 |                  |               |                   | 239           |    | 1913 |      | 239  |    |    |      |
|              |               |                |               |               |               | IKN 05         |                  |                      |                  |                  |                 |                  | 1               | 1                 |                      |                         |                  |                  |                         |                     |                   |                    |                 | 1             |                     |                    |                  |                    |                       |                 |                     | 2                   | 1                |               |                   |               |    |      | 1    | 1    |    |    |      |
|              |               |                |               |               |               | Sim ST-14      |                  |                      |                  |                  |                 | 1537             |                 |                   |                      |                         |                  |                  |                         |                     |                   | 512                |                 | 1024          |                     | 512                | 2049             | 3585               |                       |                 |                     | 6659                |                  |               |                   |               |    | 3073 | 1024 |      |    |    |      |
|              |               |                |               |               |               | Sum ST-09      |                  |                      |                  |                  |                 | 513              |                 | 513               |                      |                         |                  |                  |                         |                     |                   | 1025               |                 | 1025          |                     |                    | 513              |                    |                       |                 | 1538                |                     | 2050             |               |                   |               |    |      |      |      |    |    | 513  |
|              |               |                |               |               |               | Sum ST-01      |                  |                      |                  |                  |                 |                  | 512             |                   |                      |                         |                  |                  |                         |                     | 1024              |                    |                 | 1024          |                     |                    |                  |                    | 1536                  | 1024            |                     |                     | 512              |               |                   |               |    |      |      |      |    |    | 1024 |
|              |               |                |               |               |               | Sum ST-12      |                  |                      |                  |                  |                 |                  |                 |                   |                      |                         |                  |                  |                         |                     |                   |                    |                 |               |                     |                    | 128              |                    |                       |                 |                     |                     | 128              |               |                   |               |    |      |      |      |    |    | 64   |
|              |               |                |               |               |               | Sum ST-06      |                  |                      |                  |                  |                 |                  |                 |                   |                      |                         |                  |                  |                         |                     | 512               |                    |                 |               |                     |                    |                  |                    |                       |                 |                     |                     | 1281             |               |                   |               |    |      | 256  | 256  |    |    | 768  |
|              |               |                |               |               |               | OS1            |                  |                      |                  |                  |                 | 513              |                 |                   |                      |                         |                  |                  |                         |                     | 1539              | 1026               |                 |               |                     |                    | 513              | 513                |                       | 513             |                     | 4617                |                  | 513           |                   |               |    |      |      |      |    |    |      |
|              |               |                |               |               |               | Sum ST-13      |                  |                      |                  |                  |                 |                  |                 |                   |                      |                         |                  |                  |                         |                     | 768               |                    |                 |               |                     |                    |                  |                    | 1024                  | 512             |                     |                     | 512              |               |                   |               |    |      |      |      |    |    |      |
|              |               |                |               |               |               | Sum ST-03      |                  |                      |                  |                  |                 |                  |                 |                   |                      |                         |                  |                  |                         |                     | 24                |                    |                 |               |                     |                    |                  |                    | 24                    |                 |                     |                     | 16               |               |                   | 8             |    |      | 8    |      |    |    | 16   |
|              |               |                |               |               |               | Sum ST-11      |                  |                      |                  |                  |                 |                  |                 |                   |                      |                         |                  |                  |                         |                     |                   | 512                |                 |               |                     | 2048               | 1536             |                    |                       |                 |                     | 3073                |                  |               | 512               |               |    |      |      | 1024 |    |    |      |
|              |               |                |               |               |               | OS10           |                  |                      |                  |                  |                 |                  |                 |                   |                      |                         |                  |                  |                         |                     |                   |                    |                 |               |                     |                    |                  |                    |                       |                 | 1024                |                     |                  |               |                   |               |    |      |      | 512  |    |    |      |
|              |               |                |               |               |               | Sim ST-02      |                  |                      |                  |                  |                 |                  |                 |                   |                      |                         |                  | 2                |                         |                     |                   |                    |                 | 2             |                     |                    | 6                |                    |                       |                 | 2                   |                     |                  |               |                   |               |    |      |      | 10   |    |    |      |
| Sim ST-08    |               |                |               |               |               |                |                  |                      |                  |                  |                 |                  |                 |                   |                      |                         |                  |                  |                         |                     |                   |                    |                 | 16            |                     |                    |                  |                    |                       |                 |                     |                     |                  |               |                   |               |    |      |      |      |    |    |      |
| Sum ST-08    |               |                |               |               |               |                |                  |                      |                  |                  |                 | 1                |                 |                   | 11                   | 1                       |                  | 5                |                         |                     |                   |                    | 18              |               | 2                   |                    |                  |                    |                       |                 |                     |                     |                  |               |                   |               |    |      |      |      |    |    |      |
| OS7          |               |                |               |               |               |                | 17               | 1                    |                  |                  |                 |                  |                 |                   | 4                    |                         |                  |                  |                         |                     |                   |                    |                 | 8             |                     |                    |                  |                    |                       |                 |                     |                     |                  |               |                   |               | 29 |      |      |      |    |    |      |
|              |               |                |               |               |               |                | 9                | 121                  | 513              | 10458            | 2084            | 842              | 2243            | 1                 | 3882                 | 3077                    | 3                | 8870             | 747                     | 512                 | 5793              | 8270               | 5005            | 2252          | 1024                | 19449              | 1                | 513                | 520                   | 239             | 409                 | 6337                | 3015             | 402           | 2                 | 2550          |    |      |      |      |    |    |      |

| Transitional | Inner Neritic | Middle Neritic | Outer Neritic | Upper Bathyal | Lower Bathyal | Sample Code    | <i>Oolina</i> | <i>Operculina</i> | <i>Oridorsalis</i> | <i>Peneroplis</i> | <i>Planorbulinella</i> | <i>Planularia</i> | <i>Planulina</i> | <i>Pseudorotalia</i> | <i>Pullenia</i> | <i>Pyrgo</i> | <i>Quinqueloculina</i> | <i>Rectobolivina</i> | <i>Reussella</i> | <i>Saracenaria</i> | <i>Sigmolopsis</i> | <i>Siphogenerina</i> | <i>Siphonaptera</i> | <i>Siphonina</i> | <i>Sphaeroidina</i> | <i>Sphaerogypsina</i> | <i>Spiraloculina</i> | <i>Textularia</i> | <i>Trifarina</i> | <i>Triloculina</i> | <i>Uvigerina</i> | <i>Vaginulina</i> | <i>Virgulina</i> | <i>Vulvulina</i> | <i>Ammonia supera</i> |      |       |     |     |      |      |  |
|--------------|---------------|----------------|---------------|---------------|---------------|----------------|---------------|-------------------|--------------------|-------------------|------------------------|-------------------|------------------|----------------------|-----------------|--------------|------------------------|----------------------|------------------|--------------------|--------------------|----------------------|---------------------|------------------|---------------------|-----------------------|----------------------|-------------------|------------------|--------------------|------------------|-------------------|------------------|------------------|-----------------------|------|-------|-----|-----|------|------|--|
|              |               |                |               |               |               | P.Bembang      |               |                   |                    | 14                |                        |                   |                  | 2                    |                 |              |                        |                      | 4                |                    |                    |                      |                     |                  |                     |                       |                      |                   |                  |                    |                  |                   |                  |                  |                       |      |       |     |     |      |      |  |
|              |               |                |               |               |               | P. Parangireng |               |                   |                    |                   |                        |                   |                  |                      |                 |              |                        |                      | 54               |                    |                    |                      |                     |                  |                     |                       |                      |                   |                  | 16426              |                  |                   |                  |                  |                       |      |       |     |     |      |      |  |
|              |               |                |               |               |               | SSTH1          |               | 534               |                    | 534               |                        |                   |                  |                      | 641             |              |                        |                      | 534              |                    |                    |                      |                     |                  |                     |                       |                      |                   |                  |                    |                  | 214               |                  |                  |                       | 214  |       |     |     |      |      |  |
|              |               |                |               |               |               | SSTH2          | 58            | 117               |                    | 117               |                        |                   |                  |                      |                 |              |                        |                      | 175              |                    |                    | 58                   |                     | 58               |                     |                       |                      |                   |                  |                    |                  | 175               |                  |                  | 58                    |      |       |     |     |      |      |  |
|              |               |                |               |               |               | sem-A9         |               | 11                | 8                  |                   |                        |                   |                  |                      |                 |              |                        |                      |                  |                    |                    | 8                    |                     |                  |                     |                       | 4                    |                   | 11               | 4                  |                  | 38                |                  |                  | 11                    |      |       |     |     |      |      |  |
|              |               |                |               |               |               | sem-A21        |               |                   |                    |                   |                        |                   |                  |                      |                 |              |                        |                      |                  |                    |                    | 46                   |                     |                  |                     |                       |                      |                   |                  |                    |                  |                   | 62               |                  |                       |      |       |     |     |      |      |  |
|              |               |                |               |               |               | sem-A11        |               |                   |                    |                   |                        |                   |                  |                      |                 |              |                        |                      |                  |                    |                    | 5                    |                     |                  |                     |                       |                      |                   |                  |                    |                  |                   | 10               |                  |                       | 5    |       |     |     |      |      |  |
|              |               |                |               |               |               | sem-A6         | 41            |                   |                    |                   |                        |                   |                  |                      |                 |              |                        |                      |                  |                    |                    | 41                   |                     | 164              |                     |                       |                      |                   |                  |                    |                  |                   | 123              |                  | 41                    |      |       |     |     |      |      |  |
|              |               |                |               |               |               | sem-A5         | 21            |                   |                    |                   |                        |                   |                  |                      |                 |              |                        |                      | 104              |                    |                    | 21                   |                     | 21               |                     |                       |                      |                   |                  |                    |                  |                   |                  |                  |                       |      |       |     |     |      |      |  |
|              |               |                |               |               |               | SSTH8          | 13            | 381               |                    |                   |                        |                   |                  |                      |                 |              |                        |                      | 601              |                    |                    | 13                   |                     |                  |                     |                       |                      | 13                |                  |                    |                  |                   | 78               | 26               |                       | 78   |       |     |     |      |      |  |
|              |               |                |               |               |               | IKN 01         | 1             | 4                 |                    |                   |                        |                   |                  |                      |                 |              |                        |                      | 50               |                    |                    | 50                   |                     |                  |                     |                       |                      |                   |                  | 1                  |                  |                   | 2                | 3                |                       | 3    |       |     |     |      |      |  |
|              |               |                |               |               |               | SS10           | 2             |                   |                    |                   |                        |                   |                  |                      |                 |              |                        |                      | 19               |                    |                    | 167                  |                     | 1                |                     |                       |                      |                   |                  |                    |                  |                   | 2                | 1                |                       | 2    |       |     |     |      |      |  |
|              |               |                |               |               |               | SS09           |               | 4                 |                    |                   |                        |                   |                  |                      |                 |              |                        |                      | 3                |                    |                    | 27                   |                     |                  |                     |                       |                      |                   |                  |                    |                  |                   | 2                | 1                |                       | 4    |       |     |     |      |      |  |
|              |               |                |               |               |               | IKN 03         |               | 16                |                    |                   |                        | 1                 |                  |                      |                 |              |                        |                      | 1                |                    | 1                  | 16                   |                     |                  |                     |                       |                      |                   | 1                |                    |                  |                   | 2                | 1                |                       | 1    |       |     |     |      |      |  |
|              |               |                |               |               |               | CLP 03         |               |                   |                    |                   |                        |                   |                  |                      |                 |              | 3                      |                      |                  | 3                  |                    | 3                    | 85                  |                  |                     | 3                     |                      | 3                 |                  |                    | 5                |                   | 10               | 8                |                       |      |       |     |     | 8    |      |  |
|              |               |                |               |               |               | GC05           |               |                   |                    |                   |                        |                   |                  |                      |                 |              |                        |                      |                  | 176                |                    |                      | 25                  |                  |                     |                       |                      |                   |                  |                    |                  |                   |                  |                  |                       |      |       |     | 38  |      |      |  |
|              |               |                |               |               |               | CLP 05         |               |                   |                    |                   |                        |                   |                  |                      |                 |              | 11                     |                      |                  |                    |                    |                      | 11                  |                  |                     |                       |                      |                   |                  |                    |                  |                   | 33               | 33               | 11                    | 33   |       |     |     |      |      |  |
|              |               |                |               |               |               | CLP 06         |               | 1                 |                    |                   |                        |                   |                  |                      |                 |              | 1                      |                      | 1                |                    |                    |                      | 4                   |                  |                     | 1                     |                      |                   |                  |                    |                  |                   | 1                |                  |                       | 3    |       |     | 1   | 1    |      |  |
|              |               |                |               |               |               | CLP 07         |               | 1                 |                    |                   |                        |                   |                  |                      |                 |              |                        |                      |                  |                    |                    |                      | 3                   |                  |                     |                       |                      | 1                 |                  |                    |                  | 1                 | 1                |                  | 1                     | 2    | 1     |     |     |      |      |  |
|              |               |                |               |               |               | IKN 04         |               | 239               |                    |                   |                        |                   |                  |                      |                 |              |                        |                      | 717              |                    |                    | 239                  |                     | 1435             |                     |                       |                      |                   |                  | 478                |                  |                   | 239              | 957              |                       | 478  | 478   |     |     |      |      |  |
|              |               |                |               |               |               | IKN 05         |               | 2                 |                    |                   |                        |                   |                  |                      |                 |              |                        |                      | 1                | 1                  | 1                  | 1                    | 1                   |                  | 1                   |                       |                      |                   | 1                |                    |                  |                   |                  | 1                | 1                     |      | 2     |     |     |      |      |  |
|              |               |                |               |               |               | Sim ST-14      |               |                   |                    |                   |                        |                   |                  |                      |                 |              | 512                    |                      |                  |                    |                    | 1537                 | 512                 |                  | 512                 | 512                   | 1024                 | 2561              |                  | 512                |                  |                   | 512              | 512              |                       | 1024 | 10757 |     |     |      |      |  |
|              |               |                |               |               |               | Sum ST-09      |               | 513               |                    |                   |                        |                   |                  |                      |                 |              | 513                    |                      |                  |                    |                    |                      | 513                 | 1538             | 513                 | 513                   | 513                  | 513               |                  |                    |                  |                   |                  | 1025             |                       |      | 9738  |     |     |      |      |  |
|              |               |                |               |               |               | Sum ST-01      | 1024          |                   | 1536               |                   |                        |                   |                  |                      |                 |              | 512                    |                      | 512              | 1024               | 2048               |                      | 512                 |                  |                     |                       |                      |                   |                  |                    |                  |                   | 512              |                  |                       | 1536 | 6145  |     |     | 512  | 2048 |  |
|              |               |                |               |               |               | Sum ST-12      | 64            |                   |                    |                   |                        |                   |                  |                      |                 |              |                        | 64                   |                  |                    |                    |                      |                     |                  |                     |                       |                      |                   |                  |                    |                  |                   |                  |                  |                       |      |       | 128 |     | 128  | 64   |  |
|              |               |                |               |               |               | Sum ST-06      | 768           |                   |                    |                   |                        |                   |                  |                      |                 |              |                        | 256                  |                  |                    | 256                |                      | 512                 |                  |                     |                       |                      |                   |                  |                    | 1024             |                   |                  | 512              |                       |      | 1537  |     |     |      |      |  |
|              |               |                |               |               |               | OS1            |               |                   | 1026               |                   |                        |                   |                  |                      |                 |              |                        | 2052                 |                  |                    |                    |                      | 513                 |                  |                     |                       |                      | 1026              |                  |                    | 513              |                   | 513              |                  |                       |      | 11286 |     |     |      |      |  |
|              |               |                |               |               |               | Sum ST-13      |               |                   |                    |                   |                        |                   |                  |                      |                 |              |                        | 256                  |                  |                    | 256                |                      |                     |                  |                     |                       |                      |                   |                  |                    |                  |                   | 512              |                  |                       |      | 768   |     |     |      |      |  |
|              |               |                |               |               |               | Sum ST-03      | 16            |                   |                    |                   |                        |                   |                  |                      |                 |              |                        |                      |                  |                    |                    |                      |                     |                  |                     |                       |                      |                   |                  |                    |                  |                   |                  |                  |                       |      | 24    |     |     |      |      |  |
|              |               |                |               |               |               | Sum ST-11      |               |                   |                    |                   |                        |                   |                  |                      |                 |              | 512                    |                      |                  |                    |                    |                      |                     |                  |                     |                       |                      |                   |                  |                    |                  |                   |                  |                  |                       |      | 4609  |     |     | 1024 |      |  |
|              |               |                |               |               |               | OS10           |               |                   | 512                |                   |                        |                   |                  |                      |                 |              |                        |                      |                  |                    |                    |                      |                     |                  |                     |                       |                      |                   |                  |                    |                  |                   |                  |                  |                       |      |       | 512 | 512 |      |      |  |
|              |               |                |               |               |               | Sim ST-02      |               |                   | 6                  |                   |                        |                   |                  |                      |                 |              |                        | 12                   |                  | 8                  |                    |                      |                     |                  |                     |                       |                      |                   |                  |                    |                  |                   |                  |                  |                       |      |       |     |     |      |      |  |
| Sim ST-08    |               |                |               |               |               |                |               |                   |                    |                   |                        | 32                |                  | 16                   | 16              |              |                        |                      |                  |                    |                    |                      |                     |                  |                     |                       |                      |                   |                  |                    | 224              |                   |                  |                  |                       |      |       |     |     |      |      |  |
| Sum ST-08    |               |                |               |               |               |                |               |                   |                    |                   |                        |                   |                  |                      | 1               |              |                        |                      |                  |                    |                    |                      |                     |                  |                     |                       |                      |                   |                  |                    |                  |                   |                  |                  |                       |      |       |     |     |      |      |  |
| OS7          |               | 29             |               | 4             |               |                |               |                   |                    |                   |                        | 8                 |                  |                      | 4               | 4            | 12                     |                      |                  |                    |                    |                      |                     |                  | 4                   |                       |                      |                   |                  |                    |                  | 12                |                  | 4                |                       |      |       |     |     |      |      |  |
|              |               | 2550           | 1309          | 3092          | 665           | 1              | 1551          | 3193              | 2494               | 1053              | 4123                   | 2446              | 3076             | 2708                 | 1029            | 1537         | 4108                   | 13                   | 1004             | 1552               | 16426              | 2844                 | 3275                | 12               | 3487                | 46228                 | 514                  | 42                | 1672             | 2113               |                  |                   |                  |                  |                       |      |       |     |     |      |      |  |

## IndVal Calculation

$N_{ij}$ =average number of individuals of species/genus i in all samples in environment j

$N_i$ = total average number of individuals of species/genus I in the whole environment

$M_{ij}$ = number of samples in environment j containing genus i species

$M_i$ = total sampel on environment j

### 1 *Adelosina*

| Environment               | $N_{ij}$ | $N_i$ | $A_{ij}$ | $M_{ij}$ | $M_i$ | $B_{ij}$ | IV ij     |
|---------------------------|----------|-------|----------|----------|-------|----------|-----------|
| Transitional              | 0        | 38    | 0.000000 | 0        | 2     | 0.000000 | 0.000000  |
| Inner Neritic (Fine Sand) | 36       | 38    | 0.939204 | 1        | 1     | 1.000000 | 93.920430 |
| Inner Neritic (Silt)      | 0        | 38    | 0.000000 | 0        | 6     | 0.000000 | 0.000000  |
| Middle Neritic            | 2        | 38    | 0.060796 | 2        | 6     | 0.333333 | 2.026523  |
| Outer Neritic             | 0        | 38    | 0.000000 | 0        | 5     | 0.000000 | 0.000000  |
| Upper Bathyal             | 0        | 38    | 0.000000 | 0        | 6     | 0.000000 | 0.000000  |
| Lower Bathyal             | 0        | 38    | 0.000000 | 0        | 9     | 0.000000 | 0.000000  |

38

### 2 *Alveolinella*

| Environment               | $N_{ij}$   | $N_i$      | $A_{ij}$ | $M_{ij}$ | $M_i$ | $B_{ij}$ | IV ij     |
|---------------------------|------------|------------|----------|----------|-------|----------|-----------|
| Transitional              | 0          | 0.11466667 | 0.000000 | 0        | 2     | 0.000000 | 0.000000  |
| Inner Neritic (Fine Sand) | 0          | 0.11466667 | 0.000000 | 0        | 1     | 0.000000 | 0.000000  |
| Inner Neritic (Silt)      | 0          | 0.11466667 | 0.000000 | 0        | 6     | 0.000000 | 0.000000  |
| Middle Neritic            | 0.11466667 | 0.11466667 | 1.000000 | 1        | 6     | 0.166667 | 16.666667 |
| Outer Neritic             | 0          | 0.11466667 | 0.000000 | 0        | 5     | 0.000000 | 0.000000  |
| Upper Bathyal             | 0          | 0.11466667 | 0.000000 | 0        | 6     | 0.000000 | 0.000000  |
| Lower Bathyal             | 0          | 0.11466667 | 0.000000 | 0        | 9     | 0.000000 | 0.000000  |

0.11466667

### 3 *Ammobaculites*

| Environment               | $N_{ij}$   | $N_i$      | $A_{ij}$ | $M_{ij}$ | $M_i$ | $B_{ij}$ | IV ij     |
|---------------------------|------------|------------|----------|----------|-------|----------|-----------|
| Transitional              | 0          | 537.818133 | 0.000000 | 0        | 2     | 0.000000 | 0.000000  |
| Inner Neritic (Fine Sand) | 0          | 537.818133 | 0.000000 | 0        | 1     | 0.000000 | 0.000000  |
| Inner Neritic (Silt)      | 190.864    | 537.818133 | 0.354886 | 4        | 6     | 0.666667 | 23.659051 |
| Middle Neritic            | 5.50133333 | 537.818133 | 0.010229 | 2        | 6     | 0.333333 | 0.340966  |
| Outer Neritic             | 0          | 537.818133 | 0.000000 | 0        | 5     | 0.000000 | 0.000000  |
| Upper Bathyal             | 341.4528   | 537.818133 | 0.634885 | 2        | 6     | 0.333333 | 21.162842 |
| Lower Bathyal             | 0          | 537.818133 | 0.000000 | 0        | 9     | 0.000000 | 0.000000  |

537.818133

### 4 *Ammonia*

| Environment               | $N_{ij}$   | $N_i$      | $A_{ij}$ | $M_{ij}$ | $M_i$ | $B_{ij}$ | IV ij     |
|---------------------------|------------|------------|----------|----------|-------|----------|-----------|
| Transitional              | 325.0938   | 16819.4049 | 0.019328 | 2        | 2     | 1.000000 | 1.932850  |
| Inner Neritic (Fine Sand) | 11807.4112 | 16819.4049 | 0.702011 | 1        | 1     | 1.000000 | 70.201124 |
| Inner Neritic (Silt)      | 3910.46187 | 16819.4049 | 0.232497 | 6        | 6     | 1.000000 | 23.249704 |
| Middle Neritic            | 57.9355333 | 16819.4049 | 0.003445 | 6        | 6     | 1.000000 | 0.344457  |
| Outer Neritic             | 195.41312  | 16819.4049 | 0.011618 | 5        | 5     | 1.000000 | 1.161831  |
| Upper Bathyal             | 523.089333 | 16819.4049 | 0.031100 | 4        | 6     | 0.666667 | 2.073356  |
| Lower Bathyal             | 0          | 16819.4049 | 0.000000 | 0        | 9     | 0.000000 | 0.000000  |

16819.4049

### 5 *Amphicoryna*

| Environment               | $N_{ij}$   | $N_i$      | $A_{ij}$ | $M_{ij}$ | $M_i$ | $B_{ij}$ | IV ij     |
|---------------------------|------------|------------|----------|----------|-------|----------|-----------|
| Transitional              | 0          | 529.297973 | 0.000000 | 0        | 2     | 0.000000 | 0.000000  |
| Inner Neritic (Fine Sand) | 0          | 529.297973 | 0.000000 | 0        | 1     | 0.000000 | 0.000000  |
| Inner Neritic (Silt)      | 0          | 529.297973 | 0.000000 | 0        | 6     | 0.000000 | 0.000000  |
| Middle Neritic            | 0.43466667 | 529.297973 | 0.000821 | 1        | 6     | 0.166667 | 0.013687  |
| Outer Neritic             | 15.87744   | 529.297973 | 0.029997 | 4        | 5     | 0.800000 | 2.399773  |
| Upper Bathyal             | 0.16666667 | 529.297973 | 0.000315 | 1        | 6     | 0.166667 | 0.005248  |
| Lower Bathyal             | 512.8192   | 529.297973 | 0.968867 | 2        | 9     | 0.222222 | 21.530372 |

529.297973

#### 6 *Amphistegina*

| Environment               | Nij        | Ni         | Aij      | Mij | Mi | Bij      | IV ij     |
|---------------------------|------------|------------|----------|-----|----|----------|-----------|
| Transitional              | 2508.5194  | 4571.18421 | 0.548768 | 2   | 2  | 1.000000 | 54.876795 |
| Inner Neritic (Fine Sand) | 213.7088   | 4571.18421 | 0.046751 | 1   | 1  | 1.000000 | 4.675130  |
| Inner Neritic (Silt)      | 19.4816    | 4571.18421 | 0.004262 | 1   | 6  | 0.166667 | 0.071030  |
| Middle Neritic            | 8.98986667 | 4571.18421 | 0.001967 | 4   | 6  | 0.666667 | 0.131109  |
| Outer Neritic             | 1820.31788 | 4571.18421 | 0.398216 | 4   | 5  | 0.800000 | 31.857266 |
| Upper Bathyal             | 0.16666667 | 4571.18421 | 0.000036 | 1   | 6  | 0.166667 | 0.000608  |
| Lower Bathyal             | 0          | 4571.18421 | 0.000000 | 0   | 9  | 0.000000 | 0.000000  |

4571.18421

#### 7 *Anomalina*

| Environment               | Nij        | Ni         | Aij      | Mij | Mi | Bij      | IV ij     |
|---------------------------|------------|------------|----------|-----|----|----------|-----------|
| Transitional              | 0          | 1188.67368 | 0.000000 | 0   | 2  | 0.000000 | 0.000000  |
| Inner Neritic (Fine Sand) | 0          | 1188.67368 | 0.000000 | 0   | 1  | 0.000000 | 0.000000  |
| Inner Neritic (Silt)      | 77.3648    | 1188.67368 | 0.065085 | 4   | 6  | 0.666667 | 4.338999  |
| Middle Neritic            | 1.44393333 | 1188.67368 | 0.001215 | 4   | 6  | 0.666667 | 0.080983  |
| Outer Neritic             | 4.68352    | 1188.67368 | 0.003940 | 2   | 5  | 0.400000 | 0.157605  |
| Upper Bathyal             | 533.572267 | 1188.67368 | 0.448880 | 5   | 6  | 0.833333 | 37.406697 |
| Lower Bathyal             | 571.609156 | 1188.67368 | 0.480880 | 6   | 9  | 0.666667 | 32.058653 |

1188.67368

#### 8 *Astacolus*

| Environment               | Nij        | Ni       | Aij      | Mij | Mi | Bij      | IV ij    |
|---------------------------|------------|----------|----------|-----|----|----------|----------|
| Transitional              | 0          | 142.4336 | 0.000000 | 0   | 2  | 0.000000 | 0.000000 |
| Inner Neritic (Fine Sand) | 0          | 142.4336 | 0.000000 | 0   | 1  | 0.000000 | 0.000000 |
| Inner Neritic (Silt)      | 0          | 142.4336 | 0.000000 | 0   | 6  | 0.000000 | 0.000000 |
| Middle Neritic            | 0.11466667 | 142.4336 | 0.000805 | 1   | 6  | 0.166667 | 0.013418 |
| Outer Neritic             | 0          | 142.4336 | 0.000000 | 0   | 5  | 0.000000 | 0.000000 |
| Upper Bathyal             | 85.4186667 | 142.4336 | 0.599709 | 1   | 6  | 0.166667 | 9.995145 |
| Lower Bathyal             | 56.9002667 | 142.4336 | 0.399486 | 1   | 9  | 0.111111 | 4.438736 |

142.4336

#### 9 *Asterorotalia*

| Environment               | Nij        | Ni         | Aij      | Mij | Mi | Bij      | IV ij     |
|---------------------------|------------|------------|----------|-----|----|----------|-----------|
| Transitional              | 4.0056     | 9174.15307 | 0.000437 | 1   | 2  | 0.500000 | 0.021831  |
| Inner Neritic (Fine Sand) | 8896       | 9174.15307 | 0.969681 | 1   | 1  | 1.000000 | 96.968079 |
| Inner Neritic (Silt)      | 266.661333 | 9174.15307 | 0.029067 | 4   | 6  | 0.666667 | 1.937773  |
| Middle Neritic            | 7.48613333 | 9174.15307 | 0.000816 | 3   | 6  | 0.500000 | 0.040800  |
| Outer Neritic             | 0          | 9174.15307 | 0.000000 | 0   | 5  | 0.000000 | 0.000000  |
| Upper Bathyal             | 0          | 9174.15307 | 0.000000 | 0   | 6  | 0.000000 | 0.000000  |
| Lower Bathyal             | 0          | 9174.15307 | 0.000000 | 0   | 9  | 0.000000 | 0.000000  |

9174.15307

#### 10 *Baculogypsinoides*

| Environment               | Nij        | Ni         | Aij      | Mij | Mi | Bij      | IV ij     |
|---------------------------|------------|------------|----------|-----|----|----------|-----------|
| Transitional              | 0          | 0.11466667 | 0.000000 | 0   | 2  | 0.000000 | 0.000000  |
| Inner Neritic (Fine Sand) | 0          | 0.11466667 | 0.000000 | 0   | 1  | 0.000000 | 0.000000  |
| Inner Neritic (Silt)      | 0          | 0.11466667 | 0.000000 | 0   | 6  | 0.000000 | 0.000000  |
| Middle Neritic            | 0.11466667 | 0.11466667 | 1.000000 | 1   | 6  | 0.166667 | 16.666667 |
| Outer Neritic             | 0          | 0.11466667 | 0.000000 | 0   | 5  | 0.000000 | 0.000000  |
| Upper Bathyal             | 0          | 0.11466667 | 0.000000 | 0   | 6  | 0.000000 | 0.000000  |
| Lower Bathyal             | 0          | 0.11466667 | 0.000000 | 0   | 9  | 0.000000 | 0.000000  |

0.11466667

### 11 *Baggina*

| Environment               | Nij        | Ni       | Aij      | Mij | Mi | Bij      | IV ij     |
|---------------------------|------------|----------|----------|-----|----|----------|-----------|
| Transitional              | 0          | 235.1904 | 0.000000 | 0   | 2  | 0.000000 | 0.000000  |
| Inner Neritic (Fine Sand) | 106.8544   | 235.1904 | 0.454331 | 1   | 1  | 1.000000 | 45.433147 |
| Inner Neritic (Silt)      | 0          | 235.1904 | 0.000000 | 0   | 6  | 0.000000 | 0.000000  |
| Middle Neritic            | 0.30186667 | 235.1904 | 0.001283 | 1   | 6  | 0.166667 | 0.021392  |
| Outer Neritic             | 0          | 235.1904 | 0.000000 | 0   | 5  | 0.000000 | 0.000000  |
| Upper Bathyal             | 128.034133 | 235.1904 | 0.544385 | 2   | 6  | 0.333333 | 18.146168 |
| Lower Bathyal             | 0          | 235.1904 | 0.000000 | 0   | 9  | 0.000000 | 0.000000  |

235.1904

### 12 *Bigenerina*

| Environment               | Nij        | Ni         | Aij      | Mij | Mi | Bij      | IV ij     |
|---------------------------|------------|------------|----------|-----|----|----------|-----------|
| Transitional              | 0          | 85.4186667 | 0.000000 | 0   | 2  | 0.000000 | 0.000000  |
| Inner Neritic (Fine Sand) | 0          | 85.4186667 | 0.000000 | 0   | 1  | 0.000000 | 0.000000  |
| Inner Neritic (Silt)      | 0          | 85.4186667 | 0.000000 | 0   | 6  | 0.000000 | 0.000000  |
| Middle Neritic            | 0          | 85.4186667 | 0.000000 | 0   | 6  | 0.000000 | 0.000000  |
| Outer Neritic             | 0          | 85.4186667 | 0.000000 | 0   | 5  | 0.000000 | 0.000000  |
| Upper Bathyal             | 85.4186667 | 85.4186667 | 1.000000 | 1   | 6  | 0.166667 | 16.666667 |
| Lower Bathyal             | 0          | 85.4186667 | 0.000000 | 0   | 9  | 0.000000 | 0.000000  |

85.4186667

### 13 *Bolivina*

| Environment               | Nij        | Ni       | Aij      | Mij | Mi | Bij      | IV ij     |
|---------------------------|------------|----------|----------|-----|----|----------|-----------|
| Transitional              | 0          | 331.5664 | 0.000000 | 0   | 2  | 0.000000 | 0.000000  |
| Inner Neritic (Fine Sand) | 0          | 331.5664 | 0.000000 | 0   | 1  | 0.000000 | 0.000000  |
| Inner Neritic (Silt)      | 6.83306667 | 331.5664 | 0.020608 | 1   | 6  | 0.166667 | 0.343474  |
| Middle Neritic            | 0.11466667 | 331.5664 | 0.000346 | 1   | 6  | 0.166667 | 0.005764  |
| Outer Neritic             | 239.2      | 331.5664 | 0.721424 | 1   | 5  | 0.200000 | 14.428483 |
| Upper Bathyal             | 85.4186667 | 331.5664 | 0.257622 | 1   | 6  | 0.166667 | 4.293693  |
| Lower Bathyal             | 0          | 331.5664 | 0.000000 | 0   | 9  | 0.000000 | 0.000000  |

331.5664

### 14 *Bolivinita*

| Environment               | Nij        | Ni         | Aij      | Mij | Mi | Bij      | IV ij     |
|---------------------------|------------|------------|----------|-----|----|----------|-----------|
| Transitional              | 0          | 1516.56516 | 0.000000 | 0   | 2  | 0.000000 | 0.000000  |
| Inner Neritic (Fine Sand) | 0          | 1516.56516 | 0.000000 | 0   | 1  | 0.000000 | 0.000000  |
| Inner Neritic (Silt)      | 0.62986667 | 1516.56516 | 0.000415 | 1   | 6  | 0.166667 | 0.006922  |
| Middle Neritic            | 0          | 1516.56516 | 0.000000 | 0   | 6  | 0.000000 | 0.000000  |
| Outer Neritic             | 0          | 1516.56516 | 0.000000 | 0   | 5  | 0.000000 | 0.000000  |
| Upper Bathyal             | 1088.69973 | 1516.56516 | 0.717872 | 4   | 6  | 0.666667 | 47.858136 |
| Lower Bathyal             | 427.235556 | 1516.56516 | 0.281713 | 2   | 9  | 0.222222 | 6.260281  |

1516.56516

### 15 *Bombulina*

| Environment               | Nij        | Ni         | Aij      | Mij | Mi | Bij      | IV ij     |
|---------------------------|------------|------------|----------|-----|----|----------|-----------|
| Transitional              | 0          | 0.33333333 | 0.000000 | 0   | 2  | 0.000000 | 0.000000  |
| Inner Neritic (Fine Sand) | 0          | 0.33333333 | 0.000000 | 0   | 1  | 0.000000 | 0.000000  |
| Inner Neritic (Silt)      | 0          | 0.33333333 | 0.000000 | 0   | 6  | 0.000000 | 0.000000  |
| Middle Neritic            | 0.33333333 | 0.33333333 | 1.000000 | 2   | 6  | 0.333333 | 33.333333 |
| Outer Neritic             | 0          | 0.33333333 | 0.000000 | 0   | 5  | 0.000000 | 0.000000  |
| Upper Bathyal             | 0          | 0.33333333 | 0.000000 | 0   | 6  | 0.000000 | 0.000000  |
| Lower Bathyal             | 0          | 0.33333333 | 0.000000 | 0   | 9  | 0.000000 | 0.000000  |

0.33333333

#### 16 *Brizalina*

| Environment               | Nij        | Ni         | Aij      | Mij | Mi | Bij      | IV ij     |
|---------------------------|------------|------------|----------|-----|----|----------|-----------|
| Transitional              | 0          | 18879.1213 | 0.000000 | 0   | 2  | 0.000000 | 0.000000  |
| Inner Neritic (Fine Sand) | 0          | 18879.1213 | 0.000000 | 0   | 1  | 0.000000 | 0.000000  |
| Inner Neritic (Silt)      | 513.1008   | 18879.1213 | 0.027178 | 6   | 6  | 1.000000 | 2.717821  |
| Middle Neritic            | 53.1666667 | 18879.1213 | 0.002816 | 6   | 6  | 1.000000 | 0.281616  |
| Outer Neritic             | 11264.8    | 18879.1213 | 0.596680 | 5   | 5  | 1.000000 | 59.668031 |
| Upper Bathyal             | 6361.06287 | 18879.1213 | 0.336936 | 5   | 6  | 0.833333 | 28.078032 |
| Lower Bathyal             | 686.990933 | 18879.1213 | 0.036389 | 5   | 9  | 0.555556 | 2.021607  |

18879.1213

#### 17 *Bulimina*

| Environment               | Nij        | Ni         | Aij      | Mij | Mi | Bij      | IV ij     |
|---------------------------|------------|------------|----------|-----|----|----------|-----------|
| Transitional              | 0          | 2557.20504 | 0.000000 | 0   | 2  | 0.000000 | 0.000000  |
| Inner Neritic (Fine Sand) | 0          | 2557.20504 | 0.000000 | 0   | 1  | 0.000000 | 0.000000  |
| Inner Neritic (Silt)      | 101.8752   | 2557.20504 | 0.039838 | 6   | 6  | 1.000000 | 3.983849  |
| Middle Neritic            | 3.0816     | 2557.20504 | 0.001205 | 4   | 6  | 0.666667 | 0.080338  |
| Outer Neritic             | 16.87604   | 2557.20504 | 0.006599 | 3   | 5  | 0.600000 | 0.395964  |
| Upper Bathyal             | 1867.79673 | 2557.20504 | 0.730406 | 5   | 6  | 0.833333 | 60.867129 |
| Lower Bathyal             | 567.575467 | 2557.20504 | 0.221951 | 7   | 9  | 0.777778 | 17.262894 |

2557.20504

#### 18 *Calcarina*

| Environment               | Nij      | Ni        | Aij      | Mij | Mi | Bij      | IV ij     |
|---------------------------|----------|-----------|----------|-----|----|----------|-----------|
| Transitional              | 159.1138 | 255.96788 | 0.621616 | 2   | 2  | 1.000000 | 62.161627 |
| Inner Neritic (Fine Sand) | 0        | 255.96788 | 0.000000 | 0   | 1  | 0.000000 | 0.000000  |
| Inner Neritic (Silt)      | 0        | 255.96788 | 0.000000 | 0   | 6  | 0.000000 | 0.000000  |
| Middle Neritic            | 1.192    | 255.96788 | 0.004657 | 2   | 6  | 0.333333 | 0.155228  |
| Outer Neritic             | 95.66208 | 255.96788 | 0.373727 | 1   | 5  | 0.200000 | 7.474538  |
| Upper Bathyal             | 0        | 255.96788 | 0.000000 | 0   | 6  | 0.000000 | 0.000000  |
| Lower Bathyal             | 0        | 255.96788 | 0.000000 | 0   | 9  | 0.000000 | 0.000000  |

255.96788

#### 19 *Cancris*

| Environment               | Nij        | Ni       | Aij      | Mij | Mi | Bij      | IV ij     |
|---------------------------|------------|----------|----------|-----|----|----------|-----------|
| Transitional              | 0          | 115.3292 | 0.000000 | 0   | 2  | 0.000000 | 0.000000  |
| Inner Neritic (Fine Sand) | 0          | 115.3292 | 0.000000 | 0   | 1  | 0.000000 | 0.000000  |
| Inner Neritic (Silt)      | 0          | 115.3292 | 0.000000 | 0   | 6  | 0.000000 | 0.000000  |
| Middle Neritic            | 1.52866667 | 115.3292 | 0.013255 | 3   | 6  | 0.500000 | 0.662741  |
| Outer Neritic             | 0          | 115.3292 | 0.000000 | 0   | 5  | 0.000000 | 0.000000  |
| Upper Bathyal             | 0          | 115.3292 | 0.000000 | 0   | 6  | 0.000000 | 0.000000  |
| Lower Bathyal             | 113.800533 | 115.3292 | 0.986745 | 1   | 9  | 0.111111 | 10.963835 |

115.3292

#### 20 *Cassidulina*

| Environment               | Nij        | Ni        | Aij      | Mij | Mi | Bij      | IV ij     |
|---------------------------|------------|-----------|----------|-----|----|----------|-----------|
| Transitional              | 0          | 712.46352 | 0.000000 | 0   | 2  | 0.000000 | 0.000000  |
| Inner Neritic (Fine Sand) | 0          | 712.46352 | 0.000000 | 0   | 1  | 0.000000 | 0.000000  |
| Inner Neritic (Silt)      | 3.83626667 | 712.46352 | 0.005385 | 2   | 6  | 0.333333 | 0.179484  |
| Middle Neritic            | 0.11466667 | 712.46352 | 0.000161 | 1   | 6  | 0.166667 | 0.002682  |
| Outer Neritic             | 110.58592  | 712.46352 | 0.155216 | 4   | 5  | 0.800000 | 12.417300 |
| Upper Bathyal             | 597.926667 | 712.46352 | 0.839238 | 4   | 6  | 0.666667 | 55.949219 |
| Lower Bathyal             | 0          | 712.46352 | 0.000000 | 0   | 9  | 0.000000 | 0.000000  |

712.46352

### 21 *Cellanthus*

| Environment               | Nij        | Ni         | Aij      | Mij | Mi | Bij      | IV ij     |
|---------------------------|------------|------------|----------|-----|----|----------|-----------|
| Transitional              | 33.027     | 236.620813 | 0.139578 | 2   | 2  | 1.000000 | 13.957775 |
| Inner Neritic (Fine Sand) | 106.8544   | 236.620813 | 0.451585 | 1   | 1  | 1.000000 | 45.158496 |
| Inner Neritic (Silt)      | 0          | 236.620813 | 0.000000 | 0   | 6  | 0.000000 | 0.000000  |
| Middle Neritic            | 1.07733333 | 236.620813 | 0.004553 | 1   | 6  | 0.166667 | 0.075883  |
| Outer Neritic             | 95.66208   | 236.620813 | 0.404284 | 1   | 5  | 0.200000 | 8.085686  |
| Upper Bathyal             | 0          | 236.620813 | 0.000000 | 0   | 6  | 0.000000 | 0.000000  |
| Lower Bathyal             | 0          | 236.620813 | 0.000000 | 0   | 9  | 0.000000 | 0.000000  |

236.620813

### 22 *Ceratobulimina*

| Environment               | Nij        | Ni         | Aij      | Mij | Mi | Bij      | IV ij     |
|---------------------------|------------|------------|----------|-----|----|----------|-----------|
| Transitional              | 0          | 298.769067 | 0.000000 | 0   | 2  | 0.000000 | 0.000000  |
| Inner Neritic (Fine Sand) | 0          | 298.769067 | 0.000000 | 0   | 1  | 0.000000 | 0.000000  |
| Inner Neritic (Silt)      | 0          | 298.769067 | 0.000000 | 0   | 6  | 0.000000 | 0.000000  |
| Middle Neritic            | 0          | 298.769067 | 0.000000 | 0   | 6  | 0.000000 | 0.000000  |
| Outer Neritic             | 0          | 298.769067 | 0.000000 | 0   | 5  | 0.000000 | 0.000000  |
| Upper Bathyal             | 213.418667 | 298.769067 | 0.714327 | 1   | 6  | 0.166667 | 11.905442 |
| Lower Bathyal             | 85.3504    | 298.769067 | 0.285673 | 1   | 9  | 0.111111 | 3.174150  |

298.769067

### 23 *Ceratocancris*

| Environment               | Nij        | Ni         | Aij      | Mij | Mi | Bij      | IV ij     |
|---------------------------|------------|------------|----------|-----|----|----------|-----------|
| Transitional              | 0          | 0.89048889 | 0.000000 | 0   | 2  | 0.000000 | 0.000000  |
| Inner Neritic (Fine Sand) | 0          | 0.89048889 | 0.000000 | 0   | 1  | 0.000000 | 0.000000  |
| Inner Neritic (Silt)      | 0          | 0.89048889 | 0.000000 | 0   | 6  | 0.000000 | 0.000000  |
| Middle Neritic            | 0          | 0.89048889 | 0.000000 | 0   | 6  | 0.000000 | 0.000000  |
| Outer Neritic             | 0          | 0.89048889 | 0.000000 | 0   | 5  | 0.000000 | 0.000000  |
| Upper Bathyal             | 0          | 0.89048889 | 0.000000 | 0   | 6  | 0.000000 | 0.000000  |
| Lower Bathyal             | 0.89048889 | 0.89048889 | 1.000000 | 1   | 9  | 0.111111 | 11.111111 |

0.89048889

### 24 *Cibicides*

| Environment               | Nij        | Ni         | Aij      | Mij | Mi | Bij      | IV ij     |
|---------------------------|------------|------------|----------|-----|----|----------|-----------|
| Transitional              | 0          | 4808.90808 | 0.000000 | 0   | 2  | 0.000000 | 0.000000  |
| Inner Neritic (Fine Sand) | 854.8352   | 4808.90808 | 0.177761 | 1   | 1  | 1.000000 | 17.776077 |
| Inner Neritic (Silt)      | 195.706933 | 4808.90808 | 0.040697 | 4   | 6  | 0.666667 | 2.713117  |
| Middle Neritic            | 97.8381667 | 4808.90808 | 0.020345 | 6   | 6  | 1.000000 | 2.034519  |
| Outer Neritic             | 1765.392   | 4808.90808 | 0.367109 | 5   | 5  | 1.000000 | 36.710870 |
| Upper Bathyal             | 1068.70867 | 4808.90808 | 0.222235 | 4   | 6  | 0.666667 | 14.815680 |
| Lower Bathyal             | 826.427111 | 4808.90808 | 0.171853 | 6   | 9  | 0.666667 | 11.456892 |

4808.90808

### 25 *Dentalina*

| Environment               | Nij        | Ni         | Aij      | Mij | Mi | Bij      | IV ij     |
|---------------------------|------------|------------|----------|-----|----|----------|-----------|
| Transitional              | 0          | 1212.19202 | 0.000000 | 0   | 2  | 0.000000 | 0.000000  |
| Inner Neritic (Fine Sand) | 0          | 1212.19202 | 0.000000 | 0   | 1  | 0.000000 | 0.000000  |
| Inner Neritic (Silt)      | 0          | 1212.19202 | 0.000000 | 0   | 6  | 0.000000 | 0.000000  |
| Middle Neritic            | 0          | 1212.19202 | 0.000000 | 0   | 6  | 0.000000 | 0.000000  |
| Outer Neritic             | 2.17344    | 1212.19202 | 0.001793 | 1   | 5  | 0.200000 | 0.035860  |
| Upper Bathyal             | 725.8072   | 1212.19202 | 0.598756 | 5   | 6  | 0.833333 | 49.896330 |
| Lower Bathyal             | 484.211378 | 1212.19202 | 0.399451 | 5   | 9  | 0.555556 | 22.191725 |

1212.19202



### 26 *Discorbina*

| Environment               | Nij        | Ni         | Aij      | Mij | Mi | Bij      | IV ij     |
|---------------------------|------------|------------|----------|-----|----|----------|-----------|
| Transitional              | 0          | 85.3674667 | 0.000000 | 0   | 2  | 0.000000 | 0.000000  |
| Inner Neritic (Fine Sand) | 0          | 85.3674667 | 0.000000 | 0   | 1  | 0.000000 | 0.000000  |
| Inner Neritic (Silt)      | 0          | 85.3674667 | 0.000000 | 0   | 6  | 0.000000 | 0.000000  |
| Middle Neritic            | 0          | 85.3674667 | 0.000000 | 0   | 6  | 0.000000 | 0.000000  |
| Outer Neritic             | 0          | 85.3674667 | 0.000000 | 0   | 5  | 0.000000 | 0.000000  |
| Upper Bathyal             | 85.3674667 | 85.3674667 | 1.000000 | 1   | 6  | 0.166667 | 16.666667 |
| Lower Bathyal             | 0          | 85.3674667 | 0.000000 | 0   | 9  | 0.000000 | 0.000000  |

85.3674667

### 27 *Discorbis*

| Environment               | Nij        | Ni         | Aij      | Mij | Mi | Bij      | IV ij     |
|---------------------------|------------|------------|----------|-----|----|----------|-----------|
| Transitional              | 0          | 1.57733333 | 0.000000 | 0   | 2  | 0.000000 | 0.000000  |
| Inner Neritic (Fine Sand) | 0          | 1.57733333 | 0.000000 | 0   | 1  | 0.000000 | 0.000000  |
| Inner Neritic (Silt)      | 0          | 1.57733333 | 0.000000 | 0   | 6  | 0.000000 | 0.000000  |
| Middle Neritic            | 1.57733333 | 1.57733333 | 1.000000 | 2   | 6  | 0.333333 | 33.333333 |
| Outer Neritic             | 0          | 1.57733333 | 0.000000 | 0   | 5  | 0.000000 | 0.000000  |
| Upper Bathyal             | 0          | 1.57733333 | 0.000000 | 0   | 6  | 0.000000 | 0.000000  |
| Lower Bathyal             | 0          | 1.57733333 | 0.000000 | 0   | 9  | 0.000000 | 0.000000  |

1.57733333

### 28 *Edentostomina*

| Environment               | Nij        | Ni         | Aij      | Mij | Mi | Bij      | IV ij     |
|---------------------------|------------|------------|----------|-----|----|----------|-----------|
| Transitional              | 0          | 20.1114667 | 0.000000 | 0   | 2  | 0.000000 | 0.000000  |
| Inner Neritic (Fine Sand) | 0          | 20.1114667 | 0.000000 | 0   | 1  | 0.000000 | 0.000000  |
| Inner Neritic (Silt)      | 20.1114667 | 20.1114667 | 1.000000 | 2   | 6  | 0.333333 | 33.333333 |
| Middle Neritic            | 0          | 20.1114667 | 0.000000 | 0   | 6  | 0.000000 | 0.000000  |
| Outer Neritic             | 0          | 20.1114667 | 0.000000 | 0   | 5  | 0.000000 | 0.000000  |
| Upper Bathyal             | 0          | 20.1114667 | 0.000000 | 0   | 6  | 0.000000 | 0.000000  |
| Lower Bathyal             | 0          | 20.1114667 | 0.000000 | 0   | 9  | 0.000000 | 0.000000  |

20.1114667

### 29 *Eggerella*

| Environment               | Nij        | Ni         | Aij      | Mij | Mi | Bij      | IV ij     |
|---------------------------|------------|------------|----------|-----|----|----------|-----------|
| Transitional              | 0          | 57.0026667 | 0.000000 | 0   | 2  | 0.000000 | 0.000000  |
| Inner Neritic (Fine Sand) | 0          | 57.0026667 | 0.000000 | 0   | 1  | 0.000000 | 0.000000  |
| Inner Neritic (Silt)      | 0          | 57.0026667 | 0.000000 | 0   | 6  | 0.000000 | 0.000000  |
| Middle Neritic            | 0          | 57.0026667 | 0.000000 | 0   | 6  | 0.000000 | 0.000000  |
| Outer Neritic             | 0          | 57.0026667 | 0.000000 | 0   | 5  | 0.000000 | 0.000000  |
| Upper Bathyal             | 0          | 57.0026667 | 0.000000 | 0   | 6  | 0.000000 | 0.000000  |
| Lower Bathyal             | 57.0026667 | 57.0026667 | 1.000000 | 1   | 9  | 0.111111 | 11.111111 |

57.0026667

### 30 *Elphidium*

| Environment               | Nij        | Ni         | Aij      | Mij | Mi | Bij      | IV ij     |
|---------------------------|------------|------------|----------|-----|----|----------|-----------|
| Transitional              | 69.0966    | 6153.07161 | 0.011230 | 1   | 2  | 0.500000 | 0.561481  |
| Inner Neritic (Fine Sand) | 5235.8656  | 6153.07161 | 0.850935 | 1   | 1  | 1.000000 | 85.093526 |
| Inner Neritic (Silt)      | 739.420267 | 6153.07161 | 0.120171 | 6   | 6  | 1.000000 | 12.017092 |
| Middle Neritic            | 18.9236    | 6153.07161 | 0.003075 | 5   | 6  | 0.833333 | 0.256289  |
| Outer Neritic             | 4.34688    | 6153.07161 | 0.000706 | 1   | 5  | 0.200000 | 0.014129  |
| Upper Bathyal             | 85.4186667 | 6153.07161 | 0.013882 | 1   | 6  | 0.166667 | 0.231371  |
| Lower Bathyal             | 0          | 6153.07161 | 0.000000 | 0   | 9  | 0.000000 | 0.000000  |

6153.07161

### 31 *Eponides*

| Environment               | Nij        | Ni         | Aij      | Mij | Mi | Bij      | IV ij     |
|---------------------------|------------|------------|----------|-----|----|----------|-----------|
| Transitional              | 0          | 346.756747 | 0.000000 | 0   | 2  | 0.000000 | 0.000000  |
| Inner Neritic (Fine Sand) | 0          | 346.756747 | 0.000000 | 0   | 1  | 0.000000 | 0.000000  |
| Inner Neritic (Silt)      | 0          | 346.756747 | 0.000000 | 0   | 6  | 0.000000 | 0.000000  |
| Middle Neritic            | 0.86933333 | 346.756747 | 0.002507 | 1   | 6  | 0.166667 | 0.041784  |
| Outer Neritic             | 2.42688    | 346.756747 | 0.006999 | 2   | 5  | 0.400000 | 0.279952  |
| Upper Bathyal             | 341.619467 | 346.756747 | 0.985185 | 3   | 6  | 0.500000 | 49.259239 |
| Lower Bathyal             | 1.84106667 | 346.756747 | 0.005309 | 1   | 9  | 0.111111 | 0.058993  |

346.756747

### 32 *Fissurina*

| Environment               | Nij        | Ni         | Aij      | Mij | Mi | Bij      | IV ij     |
|---------------------------|------------|------------|----------|-----|----|----------|-----------|
| Transitional              | 0          | 140.039989 | 0.000000 | 0   | 2  | 0.000000 | 0.000000  |
| Inner Neritic (Fine Sand) | 0          | 140.039989 | 0.000000 | 0   | 1  | 0.000000 | 0.000000  |
| Inner Neritic (Silt)      | 49.9450667 | 140.039989 | 0.356649 | 3   | 6  | 0.500000 | 17.832430 |
| Middle Neritic            | 4.04416667 | 140.039989 | 0.028879 | 4   | 6  | 0.666667 | 1.925244  |
| Outer Neritic             | 0          | 140.039989 | 0.000000 | 0   | 5  | 0.000000 | 0.000000  |
| Upper Bathyal             | 85.5853333 | 140.039989 | 0.611149 | 2   | 6  | 0.333333 | 20.371641 |
| Lower Bathyal             | 0.46542222 | 140.039989 | 0.003323 | 3   | 9  | 0.333333 | 0.110783  |

140.039989

### 33 *Florilus*

| Environment               | Nij        | Ni       | Aij      | Mij | Mi | Bij      | IV ij     |
|---------------------------|------------|----------|----------|-----|----|----------|-----------|
| Transitional              | 0          | 373.8032 | 0.000000 | 0   | 2  | 0.000000 | 0.000000  |
| Inner Neritic (Fine Sand) | 0          | 373.8032 | 0.000000 | 0   | 1  | 0.000000 | 0.000000  |
| Inner Neritic (Silt)      | 369.493867 | 373.8032 | 0.988472 | 4   | 6  | 0.666667 | 65.898110 |
| Middle Neritic            | 4.30933333 | 373.8032 | 0.011528 | 1   | 6  | 0.166667 | 0.192139  |
| Outer Neritic             | 0          | 373.8032 | 0.000000 | 0   | 5  | 0.000000 | 0.000000  |
| Upper Bathyal             | 0          | 373.8032 | 0.000000 | 0   | 6  | 0.000000 | 0.000000  |
| Lower Bathyal             | 0          | 373.8032 | 0.000000 | 0   | 9  | 0.000000 | 0.000000  |

373.8032

### 34 *Glandulina*

| Environment               | Nij        | Ni         | Aij      | Mij | Mi | Bij      | IV ij     |
|---------------------------|------------|------------|----------|-----|----|----------|-----------|
| Transitional              | 0          | 0.11466667 | 0.000000 | 0   | 2  | 0.000000 | 0.000000  |
| Inner Neritic (Fine Sand) | 0          | 0.11466667 | 0.000000 | 0   | 1  | 0.000000 | 0.000000  |
| Inner Neritic (Silt)      | 0          | 0.11466667 | 0.000000 | 0   | 6  | 0.000000 | 0.000000  |
| Middle Neritic            | 0.11466667 | 0.11466667 | 1.000000 | 1   | 6  | 0.166667 | 16.666667 |
| Outer Neritic             | 0          | 0.11466667 | 0.000000 | 0   | 5  | 0.000000 | 0.000000  |
| Upper Bathyal             | 0          | 0.11466667 | 0.000000 | 0   | 6  | 0.000000 | 0.000000  |
| Lower Bathyal             | 0          | 0.11466667 | 0.000000 | 0   | 9  | 0.000000 | 0.000000  |

0.11466667

### 35 *Globobulimina*

| Environment               | Nij        | Ni       | Aij      | Mij | Mi | Bij      | IV ij     |
|---------------------------|------------|----------|----------|-----|----|----------|-----------|
| Transitional              | 0          | 516.7448 | 0.000000 | 0   | 2  | 0.000000 | 0.000000  |
| Inner Neritic (Fine Sand) | 0          | 516.7448 | 0.000000 | 0   | 1  | 0.000000 | 0.000000  |
| Inner Neritic (Silt)      | 0          | 516.7448 | 0.000000 | 0   | 6  | 0.000000 | 0.000000  |
| Middle Neritic            | 0          | 516.7448 | 0.000000 | 0   | 6  | 0.000000 | 0.000000  |
| Outer Neritic             | 0          | 516.7448 | 0.000000 | 0   | 5  | 0.000000 | 0.000000  |
| Upper Bathyal             | 256.068267 | 516.7448 | 0.495541 | 2   | 6  | 0.333333 | 16.518035 |
| Lower Bathyal             | 260.676533 | 516.7448 | 0.504459 | 5   | 9  | 0.555556 | 28.025497 |

516.7448

### 36 Globocassidulina

| Environment               | Nij        | Ni         | Aij      | Mij | Mi | Bij      | IV ij     |
|---------------------------|------------|------------|----------|-----|----|----------|-----------|
| Transitional              | 0          | 427.242222 | 0.000000 | 0   | 2  | 0.000000 | 0.000000  |
| Inner Neritic (Fine Sand) | 0          | 427.242222 | 0.000000 | 0   | 1  | 0.000000 | 0.000000  |
| Inner Neritic (Silt)      | 0          | 427.242222 | 0.000000 | 0   | 6  | 0.000000 | 0.000000  |
| Middle Neritic            | 0          | 427.242222 | 0.000000 | 0   | 6  | 0.000000 | 0.000000  |
| Outer Neritic             | 0          | 427.242222 | 0.000000 | 0   | 5  | 0.000000 | 0.000000  |
| Upper Bathyal             | 256.2048   | 427.242222 | 0.599671 | 2   | 6  | 0.333333 | 19.989036 |
| Lower Bathyal             | 171.037422 | 427.242222 | 0.400329 | 3   | 9  | 0.333333 | 13.344298 |

427.242222

### 37 Guttulina

| Environment               | Nij        | Ni         | Aij      | Mij | Mi | Bij      | IV ij     |
|---------------------------|------------|------------|----------|-----|----|----------|-----------|
| Transitional              | 0          | 0.43466667 | 0.000000 | 0   | 2  | 0.000000 | 0.000000  |
| Inner Neritic (Fine Sand) | 0          | 0.43466667 | 0.000000 | 0   | 1  | 0.000000 | 0.000000  |
| Inner Neritic (Silt)      | 0          | 0.43466667 | 0.000000 | 0   | 6  | 0.000000 | 0.000000  |
| Middle Neritic            | 0.43466667 | 0.43466667 | 1.000000 | 1   | 6  | 0.166667 | 16.666667 |
| Outer Neritic             | 0          | 0.43466667 | 0.000000 | 0   | 5  | 0.000000 | 0.000000  |
| Upper Bathyal             | 0          | 0.43466667 | 0.000000 | 0   | 6  | 0.000000 | 0.000000  |
| Lower Bathyal             | 0          | 0.43466667 | 0.000000 | 0   | 9  | 0.000000 | 0.000000  |

0.43466667

### 38 Gyroidina

| Environment               | Nij        | Ni         | Aij      | Mij | Mi | Bij      | IV ij     |
|---------------------------|------------|------------|----------|-----|----|----------|-----------|
| Transitional              | 0          | 1670.14298 | 0.000000 | 0   | 2  | 0.000000 | 0.000000  |
| Inner Neritic (Fine Sand) | 0          | 1670.14298 | 0.000000 | 0   | 1  | 0.000000 | 0.000000  |
| Inner Neritic (Silt)      | 0          | 1670.14298 | 0.000000 | 0   | 6  | 0.000000 | 0.000000  |
| Middle Neritic            | 4.14133333 | 1670.14298 | 0.002480 | 2   | 6  | 0.333333 | 0.082654  |
| Outer Neritic             | 1152.872   | 1670.14298 | 0.690283 | 4   | 5  | 0.800000 | 55.222673 |
| Upper Bathyal             | 512.379867 | 1670.14298 | 0.306788 | 3   | 6  | 0.500000 | 15.339401 |
| Lower Bathyal             | 0.74977778 | 1670.14298 | 0.000449 | 2   | 9  | 0.222222 | 0.009976  |

1670.14298

### 39 Haplophragmoides

| Environment               | Nij        | Ni         | Aij      | Mij | Mi | Bij      | IV ij     |
|---------------------------|------------|------------|----------|-----|----|----------|-----------|
| Transitional              | 0          | 124.509333 | 0.000000 | 0   | 2  | 0.000000 | 0.000000  |
| Inner Neritic (Fine Sand) | 0          | 124.509333 | 0.000000 | 0   | 1  | 0.000000 | 0.000000  |
| Inner Neritic (Silt)      | 124.509333 | 124.509333 | 1.000000 | 4   | 6  | 0.666667 | 66.666667 |
| Middle Neritic            | 0          | 124.509333 | 0.000000 | 0   | 6  | 0.000000 | 0.000000  |
| Outer Neritic             | 0          | 124.509333 | 0.000000 | 0   | 5  | 0.000000 | 0.000000  |
| Upper Bathyal             | 0          | 124.509333 | 0.000000 | 0   | 6  | 0.000000 | 0.000000  |
| Lower Bathyal             | 0          | 124.509333 | 0.000000 | 0   | 9  | 0.000000 | 0.000000  |

124.509333

### 40 Hemirobulina

| Environment               | Nij        | Ni         | Aij      | Mij | Mi | Bij      | IV ij     |
|---------------------------|------------|------------|----------|-----|----|----------|-----------|
| Transitional              | 0          | 85.3674667 | 0.000000 | 0   | 2  | 0.000000 | 0.000000  |
| Inner Neritic (Fine Sand) | 0          | 85.3674667 | 0.000000 | 0   | 1  | 0.000000 | 0.000000  |
| Inner Neritic (Silt)      | 0          | 85.3674667 | 0.000000 | 0   | 6  | 0.000000 | 0.000000  |
| Middle Neritic            | 0          | 85.3674667 | 0.000000 | 0   | 6  | 0.000000 | 0.000000  |
| Outer Neritic             | 0          | 85.3674667 | 0.000000 | 0   | 5  | 0.000000 | 0.000000  |
| Upper Bathyal             | 85.3674667 | 85.3674667 | 1.000000 | 1   | 6  | 0.166667 | 16.666667 |
| Lower Bathyal             | 0          | 85.3674667 | 0.000000 | 0   | 9  | 0.000000 | 0.000000  |

85.3674667

#### 41 *Heterolepa*

| Environment               | Nij        | Ni         | Aij      | Mij | Mi | Bij      | IV ij     |
|---------------------------|------------|------------|----------|-----|----|----------|-----------|
| Transitional              | 0          | 839.593493 | 0.000000 | 0   | 2  | 0.000000 | 0.000000  |
| Inner Neritic (Fine Sand) | 0          | 839.593493 | 0.000000 | 0   | 1  | 0.000000 | 0.000000  |
| Inner Neritic (Silt)      | 0          | 839.593493 | 0.000000 | 0   | 6  | 0.000000 | 0.000000  |
| Middle Neritic            | 5.85733333 | 839.593493 | 0.006976 | 2   | 6  | 0.333333 | 0.232546  |
| Outer Neritic             | 100.20896  | 839.593493 | 0.119354 | 3   | 5  | 0.600000 | 7.161248  |
| Upper Bathyal             | 448.256    | 839.593493 | 0.533896 | 3   | 6  | 0.500000 | 26.694823 |
| Lower Bathyal             | 285.2712   | 839.593493 | 0.339773 | 3   | 9  | 0.333333 | 11.325767 |

839.593493

#### 42 *Hoeglundina*

| Environment               | Nij        | Ni         | Aij      | Mij | Mi | Bij      | IV ij     |
|---------------------------|------------|------------|----------|-----|----|----------|-----------|
| Transitional              | 0          | 1206.29659 | 0.000000 | 0   | 2  | 0.000000 | 0.000000  |
| Inner Neritic (Fine Sand) | 0          | 1206.29659 | 0.000000 | 0   | 1  | 0.000000 | 0.000000  |
| Inner Neritic (Silt)      | 0          | 1206.29659 | 0.000000 | 0   | 6  | 0.000000 | 0.000000  |
| Middle Neritic            | 0          | 1206.29659 | 0.000000 | 0   | 6  | 0.000000 | 0.000000  |
| Outer Neritic             | 6.52032    | 1206.29659 | 0.005405 | 1   | 5  | 0.200000 | 0.108105  |
| Upper Bathyal             | 853.623467 | 1206.29659 | 0.707640 | 2   | 6  | 0.333333 | 23.587993 |
| Lower Bathyal             | 346.1528   | 1206.29659 | 0.286955 | 5   | 9  | 0.555556 | 15.941943 |

1206.29659

#### 43 *Hyalinea*

| Environment               | Nij        | Ni         | Aij      | Mij | Mi | Bij      | IV ij     |
|---------------------------|------------|------------|----------|-----|----|----------|-----------|
| Transitional              | 0          | 805.717333 | 0.000000 | 0   | 2  | 0.000000 | 0.000000  |
| Inner Neritic (Fine Sand) | 0          | 805.717333 | 0.000000 | 0   | 1  | 0.000000 | 0.000000  |
| Inner Neritic (Silt)      | 1.25973333 | 805.717333 | 0.001563 | 1   | 6  | 0.166667 | 0.026058  |
| Middle Neritic            | 0.54933333 | 805.717333 | 0.000682 | 2   | 6  | 0.333333 | 0.022726  |
| Outer Neritic             | 0          | 805.717333 | 0.000000 | 0   | 5  | 0.000000 | 0.000000  |
| Upper Bathyal             | 747.008    | 805.717333 | 0.927134 | 3   | 6  | 0.500000 | 46.356704 |
| Lower Bathyal             | 56.9002667 | 805.717333 | 0.070621 | 1   | 9  | 0.111111 | 0.784674  |

805.717333

#### 44 *Lagena*

| Environment               | Nij        | Ni         | Aij      | Mij | Mi | Bij      | IV ij     |
|---------------------------|------------|------------|----------|-----|----|----------|-----------|
| Transitional              | 0          | 347.870436 | 0.000000 | 0   | 2  | 0.000000 | 0.000000  |
| Inner Neritic (Fine Sand) | 0          | 347.870436 | 0.000000 | 0   | 1  | 0.000000 | 0.000000  |
| Inner Neritic (Silt)      | 7.5312     | 347.870436 | 0.021649 | 2   | 6  | 0.333333 | 0.721648  |
| Middle Neritic            | 7.68026667 | 347.870436 | 0.022078 | 6   | 6  | 1.000000 | 2.207795  |
| Outer Neritic             | 16.21408   | 347.870436 | 0.046610 | 4   | 5  | 0.800000 | 3.728763  |
| Upper Bathyal             | 256.256    | 347.870436 | 0.736642 | 1   | 6  | 0.166667 | 12.277368 |
| Lower Bathyal             | 60.1888889 | 347.870436 | 0.173021 | 5   | 9  | 0.555556 | 9.612277  |

347.870436

#### 45 *Laticarinina*

| Environment               | Nij        | Ni         | Aij      | Mij | Mi | Bij      | IV ij     |
|---------------------------|------------|------------|----------|-----|----|----------|-----------|
| Transitional              | 0          | 113.823289 | 0.000000 | 0   | 2  | 0.000000 | 0.000000  |
| Inner Neritic (Fine Sand) | 0          | 113.823289 | 0.000000 | 0   | 1  | 0.000000 | 0.000000  |
| Inner Neritic (Silt)      | 0          | 113.823289 | 0.000000 | 0   | 6  | 0.000000 | 0.000000  |
| Middle Neritic            | 0          | 113.823289 | 0.000000 | 0   | 6  | 0.000000 | 0.000000  |
| Outer Neritic             | 0          | 113.823289 | 0.000000 | 0   | 5  | 0.000000 | 0.000000  |
| Upper Bathyal             | 0          | 113.823289 | 0.000000 | 0   | 6  | 0.000000 | 0.000000  |
| Lower Bathyal             | 113.823289 | 113.823289 | 1.000000 | 1   | 9  | 0.111111 | 11.111111 |

113.823289

#### 46 *Lenticulina*

| Environment               | Nij        | Ni         | Aij      | Mij | Mi | Bij      | IV ij     |
|---------------------------|------------|------------|----------|-----|----|----------|-----------|
| Transitional              | 0          | 2804.31066 | 0.000000 | 0   | 2  | 0.000000 | 0.000000  |
| Inner Neritic (Fine Sand) | 0          | 2804.31066 | 0.000000 | 0   | 1  | 0.000000 | 0.000000  |
| Inner Neritic (Silt)      | 0          | 2804.31066 | 0.000000 | 0   | 6  | 0.000000 | 0.000000  |
| Middle Neritic            | 2.952      | 2804.31066 | 0.001053 | 2   | 6  | 0.333333 | 0.035089  |
| Outer Neritic             | 116.39008  | 2804.31066 | 0.041504 | 5   | 5  | 1.000000 | 4.150399  |
| Upper Bathyal             | 1771.86173 | 2804.31066 | 0.631835 | 5   | 6  | 0.833333 | 52.652920 |
| Lower Bathyal             | 913.106844 | 2804.31066 | 0.325608 | 4   | 9  | 0.444444 | 14.471480 |

2804.31066

#### 47 *Lingulina*

| Environment               | Nij        | Ni         | Aij      | Mij | Mi | Bij      | IV ij     |
|---------------------------|------------|------------|----------|-----|----|----------|-----------|
| Transitional              | 0          | 0.16666667 | 0.000000 | 0   | 2  | 0.000000 | 0.000000  |
| Inner Neritic (Fine Sand) | 0          | 0.16666667 | 0.000000 | 0   | 1  | 0.000000 | 0.000000  |
| Inner Neritic (Silt)      | 0          | 0.16666667 | 0.000000 | 0   | 6  | 0.000000 | 0.000000  |
| Middle Neritic            | 0          | 0.16666667 | 0.000000 | 0   | 6  | 0.000000 | 0.000000  |
| Outer Neritic             | 0          | 0.16666667 | 0.000000 | 0   | 5  | 0.000000 | 0.000000  |
| Upper Bathyal             | 0.16666667 | 0.16666667 | 1.000000 | 1   | 6  | 0.166667 | 16.666667 |
| Lower Bathyal             | 0          | 0.16666667 | 0.000000 | 0   | 9  | 0.000000 | 0.000000  |

0.16666667

#### 48 *Marginulina*

| Environment               | Nij        | Ni         | Aij      | Mij | Mi | Bij      | IV ij     |
|---------------------------|------------|------------|----------|-----|----|----------|-----------|
| Transitional              | 0          | 57.0026667 | 0.000000 | 0   | 2  | 0.000000 | 0.000000  |
| Inner Neritic (Fine Sand) | 0          | 57.0026667 | 0.000000 | 0   | 1  | 0.000000 | 0.000000  |
| Inner Neritic (Silt)      | 0          | 57.0026667 | 0.000000 | 0   | 6  | 0.000000 | 0.000000  |
| Middle Neritic            | 0          | 57.0026667 | 0.000000 | 0   | 6  | 0.000000 | 0.000000  |
| Outer Neritic             | 0          | 57.0026667 | 0.000000 | 0   | 5  | 0.000000 | 0.000000  |
| Upper Bathyal             | 0          | 57.0026667 | 0.000000 | 0   | 6  | 0.000000 | 0.000000  |
| Lower Bathyal             | 57.0026667 | 57.0026667 | 1.000000 | 1   | 9  | 0.111111 | 11.111111 |

57.0026667

#### 49 *Martinotiella*

| Environment               | Nij        | Ni         | Aij      | Mij | Mi | Bij      | IV ij     |
|---------------------------|------------|------------|----------|-----|----|----------|-----------|
| Transitional              | 0          | 57.7907556 | 0.000000 | 0   | 2  | 0.000000 | 0.000000  |
| Inner Neritic (Fine Sand) | 0          | 57.7907556 | 0.000000 | 0   | 1  | 0.000000 | 0.000000  |
| Inner Neritic (Silt)      | 0          | 57.7907556 | 0.000000 | 0   | 6  | 0.000000 | 0.000000  |
| Middle Neritic            | 0          | 57.7907556 | 0.000000 | 0   | 6  | 0.000000 | 0.000000  |
| Outer Neritic             | 0          | 57.7907556 | 0.000000 | 0   | 5  | 0.000000 | 0.000000  |
| Upper Bathyal             | 0          | 57.7907556 | 0.000000 | 0   | 6  | 0.000000 | 0.000000  |
| Lower Bathyal             | 57.7907556 | 57.7907556 | 1.000000 | 2   | 9  | 0.222222 | 22.222222 |

57.7907556

#### 50 *Massilina*

| Environment               | Nij      | Ni       | Aij      | Mij | Mi | Bij      | IV ij     |
|---------------------------|----------|----------|----------|-----|----|----------|-----------|
| Transitional              | 0        | 47.83104 | 0.000000 | 0   | 2  | 0.000000 | 0.000000  |
| Inner Neritic (Fine Sand) | 0        | 47.83104 | 0.000000 | 0   | 1  | 0.000000 | 0.000000  |
| Inner Neritic (Silt)      | 0        | 47.83104 | 0.000000 | 0   | 6  | 0.000000 | 0.000000  |
| Middle Neritic            | 0        | 47.83104 | 0.000000 | 0   | 6  | 0.000000 | 0.000000  |
| Outer Neritic             | 47.83104 | 47.83104 | 1.000000 | 1   | 5  | 0.200000 | 20.000000 |
| Upper Bathyal             | 0        | 47.83104 | 0.000000 | 0   | 6  | 0.000000 | 0.000000  |
| Lower Bathyal             | 0        | 47.83104 | 0.000000 | 0   | 9  | 0.000000 | 0.000000  |

47.83104

#### 51 *Miliolinella*

| Environment               | Nij     | Ni      | Aij      | Mij | Mi | Bij      | IV ij     |
|---------------------------|---------|---------|----------|-----|----|----------|-----------|
| Transitional              | 0       | 68.1856 | 0.000000 | 0   | 2  | 0.000000 | 0.000000  |
| Inner Neritic (Fine Sand) | 0       | 68.1856 | 0.000000 | 0   | 1  | 0.000000 | 0.000000  |
| Inner Neritic (Silt)      | 68.1856 | 68.1856 | 1.000000 | 1   | 6  | 0.166667 | 16.666667 |
| Middle Neritic            | 0       | 68.1856 | 0.000000 | 0   | 6  | 0.000000 | 0.000000  |
| Outer Neritic             | 0       | 68.1856 | 0.000000 | 0   | 5  | 0.000000 | 0.000000  |
| Upper Bathyal             | 0       | 68.1856 | 0.000000 | 0   | 6  | 0.000000 | 0.000000  |
| Lower Bathyal             | 0       | 68.1856 | 0.000000 | 0   | 9  | 0.000000 | 0.000000  |

68.1856

#### 52 *Neouvigerina*

| Environment               | Nij        | Ni         | Aij      | Mij | Mi | Bij      | IV ij     |
|---------------------------|------------|------------|----------|-----|----|----------|-----------|
| Transitional              | 0          | 1154.62904 | 0.000000 | 0   | 2  | 0.000000 | 0.000000  |
| Inner Neritic (Fine Sand) | 0          | 1154.62904 | 0.000000 | 0   | 1  | 0.000000 | 0.000000  |
| Inner Neritic (Silt)      | 0          | 1154.62904 | 0.000000 | 0   | 6  | 0.000000 | 0.000000  |
| Middle Neritic            | 5.40403333 | 1154.62904 | 0.004680 | 5   | 6  | 0.833333 | 0.390027  |
| Outer Neritic             | 593.27932  | 1154.62904 | 0.513827 | 5   | 5  | 1.000000 | 51.382678 |
| Upper Bathyal             | 555.0552   | 1154.62904 | 0.480722 | 2   | 6  | 0.333333 | 16.024056 |
| Lower Bathyal             | 0.89048889 | 1154.62904 | 0.000771 | 1   | 9  | 0.111111 | 0.008569  |

1154.62904

#### 53 *Nodosaria*

| Environment               | Nij        | Ni         | Aij      | Mij | Mi | Bij      | IV ij     |
|---------------------------|------------|------------|----------|-----|----|----------|-----------|
| Transitional              | 0          | 418.889289 | 0.000000 | 0   | 2  | 0.000000 | 0.000000  |
| Inner Neritic (Fine Sand) | 0          | 418.889289 | 0.000000 | 0   | 1  | 0.000000 | 0.000000  |
| Inner Neritic (Silt)      | 10.4146667 | 418.889289 | 0.024863 | 3   | 6  | 0.500000 | 1.243129  |
| Middle Neritic            | 9.2452     | 418.889289 | 0.022071 | 5   | 6  | 0.833333 | 1.839229  |
| Outer Neritic             | 13.8208    | 418.889289 | 0.032994 | 3   | 5  | 0.600000 | 1.979635  |
| Upper Bathyal             | 213.585333 | 418.889289 | 0.509885 | 3   | 6  | 0.500000 | 25.494246 |
| Lower Bathyal             | 171.823289 | 418.889289 | 0.410188 | 3   | 9  | 0.333333 | 13.672928 |

418.889289

#### 54 *Nonion*

| Environment               | Nij        | Ni         | Aij      | Mij | Mi | Bij      | IV ij     |
|---------------------------|------------|------------|----------|-----|----|----------|-----------|
| Transitional              | 0          | 77.0017733 | 0.000000 | 0   | 2  | 0.000000 | 0.000000  |
| Inner Neritic (Fine Sand) | 0          | 77.0017733 | 0.000000 | 0   | 1  | 0.000000 | 0.000000  |
| Inner Neritic (Silt)      | 0          | 77.0017733 | 0.000000 | 0   | 6  | 0.000000 | 0.000000  |
| Middle Neritic            | 17.4733333 | 77.0017733 | 0.226921 | 5   | 6  | 0.833333 | 18.910098 |
| Outer Neritic             | 59.52844   | 77.0017733 | 0.773079 | 5   | 5  | 1.000000 | 77.307882 |
| Upper Bathyal             | 0          | 77.0017733 | 0.000000 | 0   | 6  | 0.000000 | 0.000000  |
| Lower Bathyal             | 0          | 77.0017733 | 0.000000 | 0   | 9  | 0.000000 | 0.000000  |

77.0017733

#### 55 *Nonionella*

| Environment               | Nij        | Ni         | Aij      | Mij | Mi | Bij      | IV ij     |
|---------------------------|------------|------------|----------|-----|----|----------|-----------|
| Transitional              | 0          | 0.33333333 | 0.000000 | 0   | 2  | 0.000000 | 0.000000  |
| Inner Neritic (Fine Sand) | 0          | 0.33333333 | 0.000000 | 0   | 1  | 0.000000 | 0.000000  |
| Inner Neritic (Silt)      | 0          | 0.33333333 | 0.000000 | 0   | 6  | 0.000000 | 0.000000  |
| Middle Neritic            | 0.33333333 | 0.33333333 | 1.000000 | 2   | 6  | 0.333333 | 33.333333 |
| Outer Neritic             | 0          | 0.33333333 | 0.000000 | 0   | 5  | 0.000000 | 0.000000  |
| Upper Bathyal             | 0          | 0.33333333 | 0.000000 | 0   | 6  | 0.000000 | 0.000000  |
| Lower Bathyal             | 0          | 0.33333333 | 0.000000 | 0   | 9  | 0.000000 | 0.000000  |

0.33333333

#### 56 *Oolina*

| Environment               | Nij        | Ni         | Aij      | Mij | Mi | Bij      | IV ij     |
|---------------------------|------------|------------|----------|-----|----|----------|-----------|
| Transitional              | 0          | 422.487778 | 0.000000 | 0   | 2  | 0.000000 | 0.000000  |
| Inner Neritic (Fine Sand) | 0          | 422.487778 | 0.000000 | 0   | 1  | 0.000000 | 0.000000  |
| Inner Neritic (Silt)      | 20.0245333 | 422.487778 | 0.047397 | 3   | 6  | 0.500000 | 2.369836  |
| Middle Neritic            | 2.606      | 422.487778 | 0.006168 | 3   | 6  | 0.500000 | 0.308411  |
| Outer Neritic             | 0          | 422.487778 | 0.000000 | 0   | 5  | 0.000000 | 0.000000  |
| Upper Bathyal             | 394.8544   | 422.487778 | 0.934594 | 4   | 6  | 0.666667 | 62.306244 |
| Lower Bathyal             | 5.00284444 | 422.487778 | 0.011841 | 2   | 9  | 0.222222 | 0.263142  |

422.487778

#### 57 *Operculina*

| Environment               | Nij        | Ni         | Aij      | Mij | Mi | Bij      | IV ij     |
|---------------------------|------------|------------|----------|-----|----|----------|-----------|
| Transitional              | 0          | 671.479453 | 0.000000 | 0   | 2  | 0.000000 | 0.000000  |
| Inner Neritic (Fine Sand) | 534.272    | 671.479453 | 0.795664 | 1   | 1  | 1.000000 | 79.566396 |
| Inner Neritic (Silt)      | 21.3712    | 671.479453 | 0.031827 | 2   | 6  | 0.333333 | 1.060901  |
| Middle Neritic            | 67.4247333 | 671.479453 | 0.100412 | 4   | 6  | 0.666667 | 6.694147  |
| Outer Neritic             | 48.12672   | 671.479453 | 0.071673 | 3   | 5  | 0.600000 | 4.300360  |
| Upper Bathyal             | 0.2848     | 671.479453 | 0.000424 | 1   | 6  | 0.166667 | 0.007069  |
| Lower Bathyal             | 0          | 671.479453 | 0.000000 | 0   | 9  | 0.000000 | 0.000000  |

671.479453

#### 58 *Oridorsalis*

| Environment               | Nij        | Ni         | Aij      | Mij | Mi | Bij      | IV ij     |
|---------------------------|------------|------------|----------|-----|----|----------|-----------|
| Transitional              | 0          | 429.355644 | 0.000000 | 0   | 2  | 0.000000 | 0.000000  |
| Inner Neritic (Fine Sand) | 0          | 429.355644 | 0.000000 | 0   | 1  | 0.000000 | 0.000000  |
| Inner Neritic (Silt)      | 1.25973333 | 429.355644 | 0.002934 | 1   | 6  | 0.166667 | 0.048900  |
| Middle Neritic            | 0          | 429.355644 | 0.000000 | 0   | 6  | 0.000000 | 0.000000  |
| Outer Neritic             | 0          | 429.355644 | 0.000000 | 0   | 5  | 0.000000 | 0.000000  |
| Upper Bathyal             | 256.0512   | 429.355644 | 0.596362 | 1   | 6  | 0.166667 | 9.939359  |
| Lower Bathyal             | 172.044711 | 429.355644 | 0.400704 | 4   | 9  | 0.444444 | 17.809086 |

429.355644

#### 59 *Peneroplis*

| Environment               | Nij     | Ni       | Aij      | Mij | Mi | Bij      | IV ij     |
|---------------------------|---------|----------|----------|-----|----|----------|-----------|
| Transitional              | 7.0098  | 560.7634 | 0.012500 | 1   | 2  | 0.500000 | 0.625023  |
| Inner Neritic (Fine Sand) | 534.272 | 560.7634 | 0.952758 | 1   | 1  | 1.000000 | 95.275833 |
| Inner Neritic (Silt)      | 19.4816 | 560.7634 | 0.034741 | 1   | 6  | 0.166667 | 0.579020  |
| Middle Neritic            | 0       | 560.7634 | 0.000000 | 0   | 6  | 0.000000 | 0.000000  |
| Outer Neritic             | 0       | 560.7634 | 0.000000 | 0   | 5  | 0.000000 | 0.000000  |
| Upper Bathyal             | 0       | 560.7634 | 0.000000 | 0   | 6  | 0.000000 | 0.000000  |
| Lower Bathyal             | 0       | 560.7634 | 0.000000 | 0   | 9  | 0.000000 | 0.000000  |

560.7634

#### 60 *Planorbulinella*

| Environment               | Nij        | Ni         | Aij      | Mij | Mi | Bij      | IV ij     |
|---------------------------|------------|------------|----------|-----|----|----------|-----------|
| Transitional              | 0          | 0.11466667 | 0.000000 | 0   | 2  | 0.000000 | 0.000000  |
| Inner Neritic (Fine Sand) | 0          | 0.11466667 | 0.000000 | 0   | 1  | 0.000000 | 0.000000  |
| Inner Neritic (Silt)      | 0          | 0.11466667 | 0.000000 | 0   | 6  | 0.000000 | 0.000000  |
| Middle Neritic            | 0.11466667 | 0.11466667 | 1.000000 | 1   | 6  | 0.166667 | 16.666667 |
| Outer Neritic             | 0          | 0.11466667 | 0.000000 | 0   | 5  | 0.000000 | 0.000000  |
| Upper Bathyal             | 0          | 0.11466667 | 0.000000 | 0   | 6  | 0.000000 | 0.000000  |
| Lower Bathyal             | 0          | 0.11466667 | 0.000000 | 0   | 9  | 0.000000 | 0.000000  |

0.11466667

#### 61 *Planularia*

| Environment               | Nij        | Ni         | Aij      | Mij | Mi | Bij      | IV ij     |
|---------------------------|------------|------------|----------|-----|----|----------|-----------|
| Transitional              | 0          | 230.421227 | 0.000000 | 0   | 2  | 0.000000 | 0.000000  |
| Inner Neritic (Fine Sand) | 0          | 230.421227 | 0.000000 | 0   | 1  | 0.000000 | 0.000000  |
| Inner Neritic (Silt)      | 0          | 230.421227 | 0.000000 | 0   | 6  | 0.000000 | 0.000000  |
| Middle Neritic            | 0.43466667 | 230.421227 | 0.001886 | 1   | 6  | 0.166667 | 0.031440  |
| Outer Neritic             | 2.30016    | 230.421227 | 0.009982 | 2   | 5  | 0.400000 | 0.399297  |
| Upper Bathyal             | 170.786133 | 230.421227 | 0.741191 | 2   | 6  | 0.333333 | 24.706366 |
| Lower Bathyal             | 56.9002667 | 230.421227 | 0.246940 | 1   | 9  | 0.111111 | 2.743780  |

230.421227

#### 62 *Planulina*

| Environment               | Nij        | Ni         | Aij      | Mij | Mi | Bij      | IV ij     |
|---------------------------|------------|------------|----------|-----|----|----------|-----------|
| Transitional              | 0          | 400.992444 | 0.000000 | 0   | 2  | 0.000000 | 0.000000  |
| Inner Neritic (Fine Sand) | 0          | 400.992444 | 0.000000 | 0   | 1  | 0.000000 | 0.000000  |
| Inner Neritic (Silt)      | 0          | 400.992444 | 0.000000 | 0   | 6  | 0.000000 | 0.000000  |
| Middle Neritic            | 0          | 400.992444 | 0.000000 | 0   | 6  | 0.000000 | 0.000000  |
| Outer Neritic             | 0          | 400.992444 | 0.000000 | 0   | 5  | 0.000000 | 0.000000  |
| Upper Bathyal             | 138.717867 | 400.992444 | 0.345936 | 3   | 6  | 0.500000 | 17.296818 |
| Lower Bathyal             | 262.274578 | 400.992444 | 0.654064 | 5   | 9  | 0.555556 | 36.336869 |

400.992444

#### 63 *Pseudorotalia*

| Environment               | Nij        | Ni         | Aij      | Mij | Mi | Bij      | IV ij     |
|---------------------------|------------|------------|----------|-----|----|----------|-----------|
| Transitional              | 1.0014     | 980.386727 | 0.001021 | 1   | 2  | 0.500000 | 0.051072  |
| Inner Neritic (Fine Sand) | 641.1264   | 980.386727 | 0.653953 | 1   | 1  | 1.000000 | 65.395255 |
| Inner Neritic (Silt)      | 46.4757333 | 980.386727 | 0.047406 | 2   | 6  | 0.333333 | 1.580184  |
| Middle Neritic            | 112.821967 | 980.386727 | 0.115079 | 6   | 6  | 1.000000 | 11.507904 |
| Outer Neritic             | 178.79456  | 980.386727 | 0.182371 | 3   | 5  | 0.600000 | 10.942288 |
| Upper Bathyal             | 0.16666667 | 980.386727 | 0.000170 | 1   | 6  | 0.166667 | 0.002833  |
| Lower Bathyal             | 0          | 980.386727 | 0.000000 | 0   | 9  | 0.000000 | 0.000000  |

980.386727

#### 64 *Pullenia*

| Environment               | Nij        | Ni         | Aij      | Mij | Mi | Bij      | IV ij     |
|---------------------------|------------|------------|----------|-----|----|----------|-----------|
| Transitional              | 0          | 173.997244 | 0.000000 | 0   | 2  | 0.000000 | 0.000000  |
| Inner Neritic (Fine Sand) | 0          | 173.997244 | 0.000000 | 0   | 1  | 0.000000 | 0.000000  |
| Inner Neritic (Silt)      | 0          | 173.997244 | 0.000000 | 0   | 6  | 0.000000 | 0.000000  |
| Middle Neritic            | 0          | 173.997244 | 0.000000 | 0   | 6  | 0.000000 | 0.000000  |
| Outer Neritic             | 0          | 173.997244 | 0.000000 | 0   | 5  | 0.000000 | 0.000000  |
| Upper Bathyal             | 170.867467 | 173.997244 | 0.982012 | 1   | 6  | 0.166667 | 16.366875 |
| Lower Bathyal             | 3.12977778 | 173.997244 | 0.017988 | 3   | 9  | 0.333333 | 0.599584  |

173.997244

#### 65 *Pyrgo*

| Environment               | Nij        | Ni         | Aij      | Mij | Mi | Bij      | IV ij     |
|---------------------------|------------|------------|----------|-----|----|----------|-----------|
| Transitional              | 0          | 671.725511 | 0.000000 | 0   | 2  | 0.000000 | 0.000000  |
| Inner Neritic (Fine Sand) | 0          | 671.725511 | 0.000000 | 0   | 1  | 0.000000 | 0.000000  |
| Inner Neritic (Silt)      | 0          | 671.725511 | 0.000000 | 0   | 6  | 0.000000 | 0.000000  |
| Middle Neritic            | 0.54933333 | 671.725511 | 0.000818 | 2   | 6  | 0.333333 | 0.027260  |
| Outer Neritic             | 0          | 671.725511 | 0.000000 | 0   | 5  | 0.000000 | 0.000000  |
| Upper Bathyal             | 640.3544   | 671.725511 | 0.953298 | 4   | 6  | 0.666667 | 63.553182 |
| Lower Bathyal             | 30.8217778 | 671.725511 | 0.045884 | 4   | 9  | 0.444444 | 2.039310  |

671.725511



#### 66 *Quinqueloculina*

| Environment               | Nij        | Ni         | Aij      | Mij | Mi | Bij      | IV ij     |
|---------------------------|------------|------------|----------|-----|----|----------|-----------|
| Transitional              | 27         | 879.368093 | 0.030704 | 1   | 2  | 0.500000 | 1.535193  |
| Inner Neritic (Fine Sand) | 534        | 879.368093 | 0.607254 | 1   | 1  | 1.000000 | 60.725424 |
| Inner Neritic (Silt)      | 29.8962667 | 879.368093 | 0.033997 | 6   | 6  | 1.000000 | 3.399744  |
| Middle Neritic            | 59.6946667 | 879.368093 | 0.067884 | 6   | 6  | 1.000000 | 6.788359  |
| Outer Neritic             | 56.39636   | 879.368093 | 0.064133 | 5   | 5  | 1.000000 | 6.413282  |
| Upper Bathyal             | 171        | 879.368093 | 0.194458 | 2   | 6  | 0.333333 | 6.481927  |
| Lower Bathyal             | 1.3808     | 879.368093 | 0.001570 | 1   | 9  | 0.111111 | 0.017447  |

879.368093

#### 67 *Rectobolivina*

| Environment               | Nij        | Ni       | Aij      | Mij | Mi | Bij      | IV ij     |
|---------------------------|------------|----------|----------|-----|----|----------|-----------|
| Transitional              | 0          | 484.1432 | 0.000000 | 0   | 2  | 0.000000 | 0.000000  |
| Inner Neritic (Fine Sand) | 0          | 484.1432 | 0.000000 | 0   | 1  | 0.000000 | 0.000000  |
| Inner Neritic (Silt)      | 0          | 484.1432 | 0.000000 | 0   | 6  | 0.000000 | 0.000000  |
| Middle Neritic            | 0          | 484.1432 | 0.000000 | 0   | 6  | 0.000000 | 0.000000  |
| Outer Neritic             | 0          | 484.1432 | 0.000000 | 0   | 5  | 0.000000 | 0.000000  |
| Upper Bathyal             | 427.140533 | 484.1432 | 0.882261 | 3   | 6  | 0.500000 | 44.113037 |
| Lower Bathyal             | 57.0026667 | 484.1432 | 0.117739 | 1   | 9  | 0.111111 | 1.308214  |

484.1432

#### 68 *Reussella*

| Environment               | Nij        | Ni        | Aij      | Mij | Mi | Bij      | IV ij     |
|---------------------------|------------|-----------|----------|-----|----|----------|-----------|
| Transitional              | 2.0028     | 500.44124 | 0.004002 | 1   | 2  | 0.500000 | 0.200103  |
| Inner Neritic (Fine Sand) | 0          | 500.44124 | 0.000000 | 0   | 1  | 0.000000 | 0.000000  |
| Inner Neritic (Silt)      | 40.5237333 | 500.44124 | 0.080976 | 3   | 6  | 0.500000 | 4.048800  |
| Middle Neritic            | 0.14233333 | 500.44124 | 0.000284 | 1   | 6  | 0.166667 | 0.004740  |
| Outer Neritic             | 286.98624  | 500.44124 | 0.573466 | 1   | 5  | 0.200000 | 11.469328 |
| Upper Bathyal             | 170.786133 | 500.44124 | 0.341271 | 2   | 6  | 0.333333 | 11.375703 |
| Lower Bathyal             | 0          | 500.44124 | 0.000000 | 0   | 9  | 0.000000 | 0.000000  |

500.44124

#### 69 *Saracenaria*

| Environment               | Nij        | Ni         | Aij      | Mij | Mi | Bij      | IV ij     |
|---------------------------|------------|------------|----------|-----|----|----------|-----------|
| Transitional              | 0          | 171.514187 | 0.000000 | 0   | 2  | 0.000000 | 0.000000  |
| Inner Neritic (Fine Sand) | 0          | 171.514187 | 0.000000 | 0   | 1  | 0.000000 | 0.000000  |
| Inner Neritic (Silt)      | 0          | 171.514187 | 0.000000 | 0   | 6  | 0.000000 | 0.000000  |
| Middle Neritic            | 0.43466667 | 171.514187 | 0.002534 | 1   | 6  | 0.166667 | 0.042238  |
| Outer Neritic             | 0.12672    | 171.514187 | 0.000739 | 1   | 5  | 0.200000 | 0.014777  |
| Upper Bathyal             | 170.9528   | 171.514187 | 0.996727 | 3   | 6  | 0.500000 | 49.836344 |
| Lower Bathyal             | 0          | 171.514187 | 0.000000 | 0   | 9  | 0.000000 | 0.000000  |

171.514187

#### 70 *Sigmoilopsis*

| Environment               | Nij      | Ni       | Aij      | Mij | Mi | Bij      | IV ij     |
|---------------------------|----------|----------|----------|-----|----|----------|-----------|
| Transitional              | 0        | 256.1536 | 0.000000 | 0   | 2  | 0.000000 | 0.000000  |
| Inner Neritic (Fine Sand) | 0        | 256.1536 | 0.000000 | 0   | 1  | 0.000000 | 0.000000  |
| Inner Neritic (Silt)      | 0        | 256.1536 | 0.000000 | 0   | 6  | 0.000000 | 0.000000  |
| Middle Neritic            | 0        | 256.1536 | 0.000000 | 0   | 6  | 0.000000 | 0.000000  |
| Outer Neritic             | 0        | 256.1536 | 0.000000 | 0   | 5  | 0.000000 | 0.000000  |
| Upper Bathyal             | 256.1536 | 256.1536 | 1.000000 | 2   | 6  | 0.333333 | 33.333333 |
| Lower Bathyal             | 0        | 256.1536 | 0.000000 | 0   | 9  | 0.000000 | 0.000000  |

256.1536

#### 71 *Siphogenerina*

| Environment               | Nij        | Ni         | Aij      | Mij | Mi | Bij      | IV ij     |
|---------------------------|------------|------------|----------|-----|----|----------|-----------|
| Transitional              | 0          | 627.692533 | 0.000000 | 0   | 2  | 0.000000 | 0.000000  |
| Inner Neritic (Fine Sand) | 0          | 627.692533 | 0.000000 | 0   | 1  | 0.000000 | 0.000000  |
| Inner Neritic (Silt)      | 0.62986667 | 627.692533 | 0.001003 | 1   | 6  | 0.166667 | 0.016724  |
| Middle Neritic            | 0.43466667 | 627.692533 | 0.000692 | 1   | 6  | 0.166667 | 0.011541  |
| Outer Neritic             | 0.2        | 627.692533 | 0.000319 | 1   | 5  | 0.200000 | 0.006373  |
| Upper Bathyal             | 512.422667 | 627.692533 | 0.816359 | 3   | 6  | 0.500000 | 40.817967 |
| Lower Bathyal             | 114.005333 | 627.692533 | 0.181626 | 1   | 9  | 0.111111 | 2.018068  |

627.692533

#### 72 *Siphonaperta*

| Environment               | Nij        | Ni         | Aij      | Mij | Mi | Bij      | IV ij     |
|---------------------------|------------|------------|----------|-----|----|----------|-----------|
| Transitional              | 0          | 2.15466667 | 0.000000 | 0   | 2  | 0.000000 | 0.000000  |
| Inner Neritic (Fine Sand) | 0          | 2.15466667 | 0.000000 | 0   | 1  | 0.000000 | 0.000000  |
| Inner Neritic (Silt)      | 0          | 2.15466667 | 0.000000 | 0   | 6  | 0.000000 | 0.000000  |
| Middle Neritic            | 2.15466667 | 2.15466667 | 1.000000 | 1   | 6  | 0.166667 | 16.666667 |
| Outer Neritic             | 0          | 2.15466667 | 0.000000 | 0   | 5  | 0.000000 | 0.000000  |
| Upper Bathyal             | 0          | 2.15466667 | 0.000000 | 0   | 6  | 0.000000 | 0.000000  |
| Lower Bathyal             | 0          | 2.15466667 | 0.000000 | 0   | 9  | 0.000000 | 0.000000  |

2.15466667

#### 73 *Siphonina*

| Environment               | Nij        | Ni        | Aij      | Mij | Mi | Bij      | IV ij     |
|---------------------------|------------|-----------|----------|-----|----|----------|-----------|
| Transitional              | 0          | 183.20048 | 0.000000 | 0   | 2  | 0.000000 | 0.000000  |
| Inner Neritic (Fine Sand) | 0          | 183.20048 | 0.000000 | 0   | 1  | 0.000000 | 0.000000  |
| Inner Neritic (Silt)      | 1.8896     | 183.20048 | 0.010314 | 1   | 6  | 0.166667 | 0.171906  |
| Middle Neritic            | 0.11466667 | 183.20048 | 0.000626 | 1   | 6  | 0.166667 | 0.010432  |
| Outer Neritic             | 95.66208   | 183.20048 | 0.522172 | 1   | 5  | 0.200000 | 10.443431 |
| Upper Bathyal             | 85.5341333 | 183.20048 | 0.466888 | 1   | 6  | 0.166667 | 7.781469  |
| Lower Bathyal             | 0          | 183.20048 | 0.000000 | 0   | 9  | 0.000000 | 0.000000  |

183.20048

#### 74 *Sphaeroidina*

| Environment               | Nij        | Ni         | Aij      | Mij | Mi | Bij      | IV ij     |
|---------------------------|------------|------------|----------|-----|----|----------|-----------|
| Transitional              | 0          | 229.863733 | 0.000000 | 0   | 2  | 0.000000 | 0.000000  |
| Inner Neritic (Fine Sand) | 0          | 229.863733 | 0.000000 | 0   | 1  | 0.000000 | 0.000000  |
| Inner Neritic (Silt)      | 0.62986667 | 229.863733 | 0.002740 | 1   | 6  | 0.166667 | 0.045670  |
| Middle Neritic            | 1.036      | 229.863733 | 0.004507 | 2   | 6  | 0.333333 | 0.150234  |
| Outer Neritic             | 0          | 229.863733 | 0.000000 | 0   | 5  | 0.000000 | 0.000000  |
| Upper Bathyal             | 170.734933 | 229.863733 | 0.742766 | 1   | 6  | 0.166667 | 12.379431 |
| Lower Bathyal             | 57.4629333 | 229.863733 | 0.249987 | 2   | 9  | 0.222222 | 5.555266  |

229.863733

#### 75 *Sphaerogypsina*

| Environment               | Nij       | Ni        | Aij      | Mij | Mi | Bij      | IV ij     |
|---------------------------|-----------|-----------|----------|-----|----|----------|-----------|
| Transitional              | 8212.9248 | 8212.9248 | 1.000000 | 1   | 2  | 0.500000 | 50.000000 |
| Inner Neritic (Fine Sand) | 0         | 8212.9248 | 0.000000 | 0   | 1  | 0.000000 | 0.000000  |
| Inner Neritic (Silt)      | 0         | 8212.9248 | 0.000000 | 0   | 6  | 0.000000 | 0.000000  |
| Middle Neritic            | 0         | 8212.9248 | 0.000000 | 0   | 6  | 0.000000 | 0.000000  |
| Outer Neritic             | 0         | 8212.9248 | 0.000000 | 0   | 5  | 0.000000 | 0.000000  |
| Upper Bathyal             | 0         | 8212.9248 | 0.000000 | 0   | 6  | 0.000000 | 0.000000  |
| Lower Bathyal             | 0         | 8212.9248 | 0.000000 | 0   | 9  | 0.000000 | 0.000000  |

8212.9248

#### 76 *Spiroloculina*

| Environment               | Nij        | Ni         | Aij      | Mij | Mi | Bij      | IV ij     |
|---------------------------|------------|------------|----------|-----|----|----------|-----------|
| Transitional              | 0          | 604.279333 | 0.000000 | 0   | 2  | 0.000000 | 0.000000  |
| Inner Neritic (Fine Sand) | 213.7088   | 604.279333 | 0.353659 | 1   | 1  | 1.000000 | 35.365896 |
| Inner Neritic (Silt)      | 35.5210667 | 604.279333 | 0.058783 | 2   | 6  | 0.333333 | 1.959418  |
| Middle Neritic            | 15.6265333 | 604.279333 | 0.025860 | 5   | 6  | 0.833333 | 2.154982  |
| Outer Neritic             | 54.8048    | 604.279333 | 0.090694 | 4   | 5  | 0.800000 | 7.255558  |
| Upper Bathyal             | 170.717867 | 604.279333 | 0.282515 | 2   | 6  | 0.333333 | 9.417161  |
| Lower Bathyal             | 113.900267 | 604.279333 | 0.188489 | 2   | 9  | 0.222222 | 4.188654  |

604.279333

#### 77 *Textularia*

| Environment               | Nij        | Ni         | Aij      | Mij | Mi | Bij      | IV ij     |
|---------------------------|------------|------------|----------|-----|----|----------|-----------|
| Transitional              | 0          | 578.852413 | 0.000000 | 0   | 2  | 0.000000 | 0.000000  |
| Inner Neritic (Fine Sand) | 0          | 578.852413 | 0.000000 | 0   | 1  | 0.000000 | 0.000000  |
| Inner Neritic (Silt)      | 32.4533333 | 578.852413 | 0.056065 | 3   | 6  | 0.500000 | 2.803248  |
| Middle Neritic            | 6.61566667 | 578.852413 | 0.011429 | 6   | 6  | 1.000000 | 1.142894  |
| Outer Neritic             | 198.04448  | 578.852413 | 0.342133 | 3   | 5  | 0.600000 | 20.527977 |
| Upper Bathyal             | 341.738933 | 578.852413 | 0.590373 | 3   | 6  | 0.500000 | 29.518658 |
| Lower Bathyal             | 0          | 578.852413 | 0.000000 | 0   | 9  | 0.000000 | 0.000000  |

578.852413

#### 78 *Trifarina*

| Environment               | Nij        | Ni         | Aij      | Mij | Mi | Bij      | IV ij     |
|---------------------------|------------|------------|----------|-----|----|----------|-----------|
| Transitional              | 0          | 2.34010667 | 0.000000 | 0   | 2  | 0.000000 | 0.000000  |
| Inner Neritic (Fine Sand) | 0          | 2.34010667 | 0.000000 | 0   | 1  | 0.000000 | 0.000000  |
| Inner Neritic (Silt)      | 0          | 2.34010667 | 0.000000 | 0   | 6  | 0.000000 | 0.000000  |
| Middle Neritic            | 0          | 2.34010667 | 0.000000 | 0   | 6  | 0.000000 | 0.000000  |
| Outer Neritic             | 2.17344    | 2.34010667 | 0.928778 | 1   | 5  | 0.200000 | 18.575564 |
| Upper Bathyal             | 0.16666667 | 2.34010667 | 0.071222 | 0   | 6  | 0.000000 | 0.000000  |
| Lower Bathyal             | 0          | 2.34010667 | 0.000000 | 0   | 9  | 0.000000 | 0.000000  |

2.34010667

#### 79 *Triloculina*

| Environment               | Nij        | Ni         | Aij      | Mij | Mi | Bij      | IV ij     |
|---------------------------|------------|------------|----------|-----|----|----------|-----------|
| Transitional              | 0          | 776.358347 | 0.000000 | 0   | 2  | 0.000000 | 0.000000  |
| Inner Neritic (Fine Sand) | 213.7088   | 776.358347 | 0.275271 | 1   | 1  | 1.000000 | 27.527082 |
| Inner Neritic (Silt)      | 18.4634667 | 776.358347 | 0.023782 | 3   | 6  | 0.500000 | 1.189107  |
| Middle Neritic            | 14.5106667 | 776.358347 | 0.018691 | 5   | 6  | 0.833333 | 1.557557  |
| Outer Neritic             | 102.88928  | 776.358347 | 0.132528 | 4   | 5  | 0.800000 | 10.602246 |
| Upper Bathyal             | 426.786133 | 776.358347 | 0.549728 | 2   | 6  | 0.333333 | 18.324276 |
| Lower Bathyal             | 0          | 776.358347 | 0.000000 | 0   | 9  | 0.000000 | 0.000000  |

776.358347

#### 80 *Uvigerina*

| Environment               | Nij        | Ni         | Aij      | Mij | Mi | Bij      | IV ij     |
|---------------------------|------------|------------|----------|-----|----|----------|-----------|
| Transitional              | 0          | 6751.98608 | 0.000000 | 0   | 2  | 0.000000 | 0.000000  |
| Inner Neritic (Fine Sand) | 0          | 6751.98608 | 0.000000 | 0   | 1  | 0.000000 | 0.000000  |
| Inner Neritic (Silt)      | 0.824      | 6751.98608 | 0.000122 | 1   | 6  | 0.166667 | 0.002034  |
| Middle Neritic            | 0          | 6751.98608 | 0.000000 | 0   | 6  | 0.000000 | 0.000000  |
| Outer Neritic             | 96.06208   | 6751.98608 | 0.014227 | 2   | 5  | 0.400000 | 0.569089  |
| Upper Bathyal             | 4717.78107 | 6751.98608 | 0.698725 | 6   | 6  | 1.000000 | 69.872494 |
| Lower Bathyal             | 1937.31893 | 6751.98608 | 0.286926 | 7   | 9  | 0.777778 | 22.316450 |

6751.98608

81 *Vaginulina*

| Environment               | Nij        | Ni         | Aij      | Mij | Mi | Bij      | IV ij     |
|---------------------------|------------|------------|----------|-----|----|----------|-----------|
| Transitional              | 0          | 57.2383644 | 0.000000 | 0   | 2  | 0.000000 | 0.000000  |
| Inner Neritic (Fine Sand) | 0          | 57.2383644 | 0.000000 | 0   | 1  | 0.000000 | 0.000000  |
| Inner Neritic (Silt)      | 0          | 57.2383644 | 0.000000 | 0   | 6  | 0.000000 | 0.000000  |
| Middle Neritic            | 0          | 57.2383644 | 0.000000 | 0   | 6  | 0.000000 | 0.000000  |
| Outer Neritic             | 0.32672    | 57.2383644 | 0.005708 | 2   | 5  | 0.400000 | 0.228322  |
| Upper Bathyal             | 0          | 57.2383644 | 0.000000 | 0   | 6  | 0.000000 | 0.000000  |
| Lower Bathyal             | 56.9116444 | 57.2383644 | 0.994292 | 1   | 9  | 0.111111 | 11.047688 |

57.2383644

82 *Virgulina*

| Environment               | Nij        | Ni         | Aij      | Mij | Mi | Bij      | IV ij     |
|---------------------------|------------|------------|----------|-----|----|----------|-----------|
| Transitional              | 0          | 8.10140444 | 0.000000 | 0   | 2  | 0.000000 | 0.000000  |
| Inner Neritic (Fine Sand) | 0          | 8.10140444 | 0.000000 | 0   | 1  | 0.000000 | 0.000000  |
| Inner Neritic (Silt)      | 0          | 8.10140444 | 0.000000 | 0   | 6  | 0.000000 | 0.000000  |
| Middle Neritic            | 0          | 8.10140444 | 0.000000 | 0   | 6  | 0.000000 | 0.000000  |
| Outer Neritic             | 7.65696    | 8.10140444 | 0.945140 | 2   | 5  | 0.400000 | 37.805593 |
| Upper Bathyal             | 0          | 8.10140444 | 0.000000 | 0   | 6  | 0.000000 | 0.000000  |
| Lower Bathyal             | 0.44444444 | 8.10140444 | 0.054860 | 1   | 9  | 0.111111 | 0.609557  |

8.10140444

83 *Vulvulina*

| Environment               | Nij        | Ni       | Aij      | Mij | Mi | Bij      | IV ij     |
|---------------------------|------------|----------|----------|-----|----|----------|-----------|
| Transitional              | 0          | 221.8224 | 0.000000 | 0   | 2  | 0.000000 | 0.000000  |
| Inner Neritic (Fine Sand) | 0          | 221.8224 | 0.000000 | 0   | 1  | 0.000000 | 0.000000  |
| Inner Neritic (Silt)      | 0          | 221.8224 | 0.000000 | 0   | 6  | 0.000000 | 0.000000  |
| Middle Neritic            | 1.304      | 221.8224 | 0.005879 | 1   | 6  | 0.166667 | 0.097976  |
| Outer Neritic             | 0          | 221.8224 | 0.000000 | 0   | 5  | 0.000000 | 0.000000  |
| Upper Bathyal             | 106.717867 | 221.8224 | 0.481096 | 2   | 6  | 0.333333 | 16.036533 |
| Lower Bathyal             | 113.800533 | 221.8224 | 0.513025 | 1   | 9  | 0.111111 | 5.700283  |

221.8224

84 *Ammonia supera*

| Environment               | Nij        | Ni         | Aij      | Mij | Mi | Bij      | IV ij     |
|---------------------------|------------|------------|----------|-----|----|----------|-----------|
| Transitional              | 0          | 352.085333 | 0.000000 | 0   | 2  | 0.000000 | 0.000000  |
| Inner Neritic (Fine Sand) | 0          | 352.085333 | 0.000000 | 0   | 1  | 0.000000 | 0.000000  |
| Inner Neritic (Silt)      | 0          | 352.085333 | 0.000000 | 0   | 6  | 0.000000 | 0.000000  |
| Middle Neritic            | 0          | 352.085333 | 0.000000 | 0   | 6  | 0.000000 | 0.000000  |
| Outer Neritic             | 0          | 352.085333 | 0.000000 | 0   | 5  | 0.000000 | 0.000000  |
| Upper Bathyal             | 352.085333 | 352.085333 | 1.000000 | 2   | 6  | 0.333333 | 33.333333 |
| Lower Bathyal             | 0          | 352.085333 | 0.000000 | 0   | 9  | 0.000000 | 0.000000  |

352.085333

# IndVal Result (Genus)

| Total sampel             | 2                    | 1                         | 6                    | 6              | 5             | 6             | 9             | IndVal Max                | IndVal Max (%) |
|--------------------------|----------------------|---------------------------|----------------------|----------------|---------------|---------------|---------------|---------------------------|----------------|
| Environment              | Transition al        | Inner Neritic (Fine Sand) | Inner Neritic (Silt) | Middle Neritic | Outer Neritic | Upper Bathyal | Lower Bathyal |                           |                |
| Variable                 | Indicator Value (IV) |                           |                      |                |               |               |               |                           |                |
| <i>Amphistegina</i>      | 54.88                | 4.68                      | 0.07                 | 0.13           | 31.86         | 0.00          | 0.00          | Transitional              | 54.88          |
| <i>Calcarina</i>         | 62.16                | 0.00                      | 0.00                 | 0.16           | 7.47          | 0.00          | 0.00          | Transitional              | 62.16          |
| <i>Sphaerogypsina</i>    | 50.00                | 0.00                      | 0.00                 | 0.00           | 0.00          | 0.00          | 0.00          | Transitional              | 50.00          |
| <i>Asterorotalia</i>     | 0.02                 | 96.97                     | 1.94                 | 0.04           | 0.00          | 0.00          | 0.00          | Inner Neritic (Fine Sand) | 96.97          |
| <i>Peneroplis</i>        | 0.63                 | 95.28                     | 0.58                 | 0.00           | 0.00          | 0.00          | 0.00          | Inner Neritic (Fine Sand) | 95.28          |
| <i>Adelosina</i>         | 0.00                 | 93.92                     | 0.00                 | 2.03           | 0.00          | 0.00          | 0.00          | Inner Neritic (Fine Sand) | 93.92          |
| <i>Elphidium</i>         | 0.56                 | 85.09                     | 12.02                | 0.26           | 0.01          | 0.23          | 0.00          | Inner Neritic (Fine Sand) | 85.09          |
| <i>Operculina</i>        | 0.00                 | 79.57                     | 1.06                 | 6.69           | 4.30          | 0.01          | 0.00          | Inner Neritic (Fine Sand) | 79.57          |
| <i>Ammonia</i>           | 1.93                 | 70.20                     | 23.25                | 0.34           | 1.16          | 2.07          | 0.00          | Inner Neritic (Fine Sand) | 70.20          |
| <i>Pseudorotalia</i>     | 0.05                 | 65.40                     | 1.58                 | 11.51          | 10.94         | 0.00          | 0.00          | Inner Neritic (Fine Sand) | 65.40          |
| <i>Quinqueloculina</i>   | 1.54                 | 60.73                     | 3.40                 | 6.79           | 6.41          | 6.48          | 0.02          | Inner Neritic (Fine Sand) | 60.73          |
| <i>Baggina</i>           | 0.00                 | 45.43                     | 0.00                 | 0.02           | 0.00          | 18.15         | 0.00          | Inner Neritic (Fine Sand) | 45.43          |
| <i>Cellanthus</i>        | 13.96                | 45.16                     | 0.00                 | 0.08           | 8.09          | 0.00          | 0.00          | Inner Neritic (Fine Sand) | 45.16          |
| <i>Spiroloculina</i>     | 0.00                 | 35.37                     | 1.96                 | 2.15           | 7.26          | 9.42          | 4.19          | Inner Neritic (Fine Sand) | 35.37          |
| <i>Triloculina</i>       | 0.00                 | 27.53                     | 1.19                 | 1.56           | 10.60         | 18.32         | 0.00          | Inner Neritic (Fine Sand) | 27.53          |
| <i>Haplophragmoides</i>  | 0.00                 | 0.00                      | 66.67                | 0.00           | 0.00          | 0.00          | 0.00          | Inner Neritic (Silt)      | 66.67          |
| <i>Florilus</i>          | 0.00                 | 0.00                      | 65.90                | 0.19           | 0.00          | 0.00          | 0.00          | Inner Neritic (Silt)      | 65.90          |
| <i>Edentostomina</i>     | 0.00                 | 0.00                      | 33.33                | 0.00           | 0.00          | 0.00          | 0.00          | Inner Neritic (Silt)      | 33.33          |
| <i>Ammobaculites</i>     | 0.00                 | 0.00                      | 23.66                | 0.34           | 0.00          | 21.16         | 0.00          | Inner Neritic (Silt)      | 23.66          |
| <i>Miliolinella</i>      | 0.00                 | 0.00                      | 16.67                | 0.00           | 0.00          | 0.00          | 0.00          | Inner Neritic (Silt)      | 16.67          |
| <i>Bombulina</i>         | 0.00                 | 0.00                      | 0.00                 | 33.33          | 0.00          | 0.00          | 0.00          | Middle Neritic            | 33.33          |
| <i>Discorbis</i>         | 0.00                 | 0.00                      | 0.00                 | 33.33          | 0.00          | 0.00          | 0.00          | Middle Neritic            | 33.33          |
| <i>Nonionella</i>        | 0.00                 | 0.00                      | 0.00                 | 33.33          | 0.00          | 0.00          | 0.00          | Middle Neritic            | 33.33          |
| <i>Alveolinella</i>      | 0.00                 | 0.00                      | 0.00                 | 16.67          | 0.00          | 0.00          | 0.00          | Middle Neritic            | 16.67          |
| <i>Guttulina</i>         | 0.00                 | 0.00                      | 0.00                 | 16.67          | 0.00          | 0.00          | 0.00          | Middle Neritic            | 16.67          |
| <i>Siphonaperta</i>      | 0.00                 | 0.00                      | 0.00                 | 16.67          | 0.00          | 0.00          | 0.00          | Middle Neritic            | 16.67          |
| <i>Baculogypsinoidea</i> | 0.00                 | 0.00                      | 0.00                 | 16.67          | 0.00          | 0.00          | 0.00          | Middle Neritic            | 16.67          |
| <i>Glandulina</i>        | 0.00                 | 0.00                      | 0.00                 | 16.67          | 0.00          | 0.00          | 0.00          | Middle Neritic            | 16.67          |
| <i>Planorbulinella</i>   | 0.00                 | 0.00                      | 0.00                 | 16.67          | 0.00          | 0.00          | 0.00          | Middle Neritic            | 16.67          |
| <i>Nonion</i>            | 0.00                 | 0.00                      | 0.00                 | 18.91          | 77.31         | 0.00          | 0.00          | Outer Neritic             | 77.31          |
| <i>Brizalina</i>         | 0.00                 | 0.00                      | 2.72                 | 0.28           | 59.67         | 28.08         | 2.02          | Outer Neritic             | 59.67          |
| <i>Gyroidina</i>         | 0.00                 | 0.00                      | 0.00                 | 0.08           | 55.22         | 15.34         | 0.01          | Outer Neritic             | 55.22          |
| <i>Neouvigerina</i>      | 0.00                 | 0.00                      | 0.00                 | 0.39           | 51.38         | 16.02         | 0.01          | Outer Neritic             | 51.38          |
| <i>Virgulina</i>         | 0.00                 | 0.00                      | 0.00                 | 0.00           | 37.81         | 0.00          | 0.61          | Outer Neritic             | 37.81          |
| <i>Cibicides</i>         | 0.00                 | 17.78                     | 2.71                 | 2.03           | 36.71         | 14.82         | 11.46         | Outer Neritic             | 36.71          |
| <i>Massilina</i>         | 0.00                 | 0.00                      | 0.00                 | 0.00           | 20.00         | 0.00          | 0.00          | Outer Neritic             | 20.00          |
| <i>Trifarina</i>         | 0.00                 | 0.00                      | 0.00                 | 0.00           | 18.58         | 0.00          | 0.00          | Outer Neritic             | 18.58          |
| <i>Bolivina</i>          | 0.00                 | 0.00                      | 0.34                 | 0.01           | 14.43         | 4.29          | 0.00          | Outer Neritic             | 14.43          |
| <i>Reussella</i>         | 0.20                 | 0.00                      | 4.05                 | 0.00           | 11.47         | 11.38         | 0.00          | Outer Neritic             | 11.47          |
| <i>Siphonina</i>         | 0.00                 | 0.00                      | 0.17                 | 0.01           | 10.44         | 7.78          | 0.00          | Outer Neritic             | 10.44          |
| <i>Uvigerina</i>         | 0.00                 | 0.00                      | 0.00                 | 0.00           | 0.57          | 69.87         | 22.32         | Upper Bathyal             | 69.87          |
| <i>Pyrgo</i>             | 0.00                 | 0.00                      | 0.00                 | 0.03           | 0.00          | 63.55         | 2.04          | Upper Bathyal             | 63.55          |
| <i>Oolina</i>            | 0.00                 | 0.00                      | 2.37                 | 0.31           | 0.00          | 62.31         | 0.26          | Upper Bathyal             | 62.31          |
| <i>Bulimina</i>          | 0.00                 | 0.00                      | 3.98                 | 0.08           | 0.40          | 60.87         | 17.26         | Upper Bathyal             | 60.87          |
| <i>Cassidulina</i>       | 0.00                 | 0.00                      | 0.18                 | 0.00           | 12.42         | 55.95         | 0.00          | Upper Bathyal             | 55.95          |
| <i>Lenticulina</i>       | 0.00                 | 0.00                      | 0.00                 | 0.04           | 4.15          | 52.65         | 14.47         | Upper Bathyal             | 52.65          |
| <i>Dentalina</i>         | 0.00                 | 0.00                      | 0.00                 | 0.00           | 0.04          | 49.90         | 22.19         | Upper Bathyal             | 49.90          |
| <i>Saracenaria</i>       | 0.00                 | 0.00                      | 0.00                 | 0.04           | 0.01          | 49.84         | 0.00          | Upper Bathyal             | 49.84          |
| <i>Eponides</i>          | 0.00                 | 0.00                      | 0.00                 | 0.04           | 0.28          | 49.26         | 0.06          | Upper Bathyal             | 49.26          |
| <i>Bolivinita</i>        | 0.00                 | 0.00                      | 0.01                 | 0.00           | 0.00          | 47.86         | 6.26          | Upper Bathyal             | 47.86          |
| <i>Hyalinea</i>          | 0.00                 | 0.00                      | 0.03                 | 0.02           | 0.00          | 46.36         | 0.78          | Upper Bathyal             | 46.36          |
| <i>Rectobolivina</i>     | 0.00                 | 0.00                      | 0.00                 | 0.00           | 0.00          | 44.11         | 1.31          | Upper Bathyal             | 44.11          |
| <i>Siphogenerina</i>     | 0.00                 | 0.00                      | 0.02                 | 0.01           | 0.01          | 40.82         | 2.02          | Upper Bathyal             | 40.82          |
| <i>Anomalina</i>         | 0.00                 | 0.00                      | 4.34                 | 0.08           | 0.16          | 37.41         | 32.06         | Upper Bathyal             | 37.41          |
| <i>Sigmoilopsis</i>      | 0.00                 | 0.00                      | 0.00                 | 0.00           | 0.00          | 33.33         | 0.00          | Upper Bathyal             | 33.33          |
| <i>Ammonia supera</i>    | 0.00                 | 0.00                      | 0.00                 | 0.00           | 0.00          | 33.33         | 0.00          | Upper Bathyal             | 33.33          |
| <i>Textularia</i>        | 0.00                 | 0.00                      | 2.80                 | 1.14           | 20.53         | 29.52         | 0.00          | Upper Bathyal             | 29.52          |
| <i>Heterolepa</i>        | 0.00                 | 0.00                      | 0.00                 | 0.23           | 7.16          | 26.69         | 11.33         | Upper Bathyal             | 26.69          |
| <i>Nodosaria</i>         | 0.00                 | 0.00                      | 1.24                 | 1.84           | 1.98          | 25.49         | 13.67         | Upper Bathyal             | 25.49          |
| <i>Planularia</i>        | 0.00                 | 0.00                      | 0.00                 | 0.03           | 0.40          | 24.71         | 2.74          | Upper Bathyal             | 24.71          |
| <i>Hoeglundina</i>       | 0.00                 | 0.00                      | 0.00                 | 0.00           | 0.11          | 23.59         | 15.94         | Upper Bathyal             | 23.59          |

| Total sampel            | 2                    | 1                         | 6                    | 6              | 5             | 6             | 9             | IndVal Max    | IndVal Max (%) |
|-------------------------|----------------------|---------------------------|----------------------|----------------|---------------|---------------|---------------|---------------|----------------|
| Environment             | Transitional         | Inner Neritic (Fine Sand) | Inner Neritic (Silt) | Middle Neritic | Outer Neritic | Upper Bathyal | Lower Bathyal |               |                |
| Variable                | Indicator Value (IV) |                           |                      |                |               |               |               |               |                |
| <i>Fissurina</i>        | 0.00                 | 0.00                      | 17.83                | 1.93           | 0.00          | 20.37         | 0.11          | Upper Bathyal | 20.37          |
| <i>Globocassidulina</i> | 0.00                 | 0.00                      | 0.00                 | 0.00           | 0.00          | 19.99         | 13.34         | Upper Bathyal | 19.99          |
| <i>Discorbina</i>       | 0.00                 | 0.00                      | 0.00                 | 0.00           | 0.00          | 16.67         | 0.00          | Upper Bathyal | 16.67          |
| <i>Bigenerina</i>       | 0.00                 | 0.00                      | 0.00                 | 0.00           | 0.00          | 16.67         | 0.00          | Upper Bathyal | 16.67          |
| <i>Hemirobulina</i>     | 0.00                 | 0.00                      | 0.00                 | 0.00           | 0.00          | 16.67         | 0.00          | Upper Bathyal | 16.67          |
| <i>Lingulina</i>        | 0.00                 | 0.00                      | 0.00                 | 0.00           | 0.00          | 16.67         | 0.00          | Upper Bathyal | 16.67          |
| <i>Pullenia</i>         | 0.00                 | 0.00                      | 0.00                 | 0.00           | 0.00          | 16.37         | 0.60          | Upper Bathyal | 16.37          |
| <i>Vulvulina</i>        | 0.00                 | 0.00                      | 0.00                 | 0.10           | 0.00          | 16.04         | 5.70          | Upper Bathyal | 16.04          |
| <i>Sphaeroidina</i>     | 0.00                 | 0.00                      | 0.05                 | 0.15           | 0.00          | 12.38         | 5.56          | Upper Bathyal | 12.38          |
| <i>Lagena</i>           | 0.00                 | 0.00                      | 0.72                 | 2.21           | 3.73          | 12.28         | 9.61          | Upper Bathyal | 12.28          |
| <i>Ceratobulimina</i>   | 0.00                 | 0.00                      | 0.00                 | 0.00           | 0.00          | 11.91         | 3.17          | Upper Bathyal | 11.91          |
| <i>Astacolus</i>        | 0.00                 | 0.00                      | 0.00                 | 0.01           | 0.00          | 10.00         | 4.44          | Upper Bathyal | 10.00          |
| <i>Planulina</i>        | 0.00                 | 0.00                      | 0.00                 | 0.00           | 0.00          | 17.30         | 36.34         | Lower Bathyal | 36.34          |
| <i>Globobulimina</i>    | 0.00                 | 0.00                      | 0.00                 | 0.00           | 0.00          | 16.52         | 28.03         | Lower Bathyal | 28.03          |
| <i>Martinotiella</i>    | 0.00                 | 0.00                      | 0.00                 | 0.00           | 0.00          | 0.00          | 22.22         | Lower Bathyal | 22.22          |
| <i>Amphicoryna</i>      | 0.00                 | 0.00                      | 0.00                 | 0.01           | 2.40          | 0.01          | 21.53         | Lower Bathyal | 21.53          |
| <i>Oridorsalis</i>      | 0.00                 | 0.00                      | 0.05                 | 0.00           | 0.00          | 9.94          | 17.81         | Lower Bathyal | 17.81          |
| <i>Ceratocancris</i>    | 0.00                 | 0.00                      | 0.00                 | 0.00           | 0.00          | 0.00          | 11.11         | Lower Bathyal | 11.11          |
| <i>Eggerella</i>        | 0.00                 | 0.00                      | 0.00                 | 0.00           | 0.00          | 0.00          | 11.11         | Lower Bathyal | 11.11          |
| <i>Laticarinina</i>     | 0.00                 | 0.00                      | 0.00                 | 0.00           | 0.00          | 0.00          | 11.11         | Lower Bathyal | 11.11          |
| <i>Marginulina</i>      | 0.00                 | 0.00                      | 0.00                 | 0.00           | 0.00          | 0.00          | 11.11         | Lower Bathyal | 11.11          |
| <i>Vaginulina</i>       | 0.00                 | 0.00                      | 0.00                 | 0.00           | 0.23          | 0.00          | 11.05         | Lower Bathyal | 11.05          |
| <i>Cancris</i>          | 0.00                 | 0.00                      | 0.00                 | 0.66           | 0.00          | 0.00          | 10.96         | Lower Bathyal | 10.96          |
