# Supplementary material
Source: Copernicus journal article supplement (doi:10.5194/jm-45-487-2026)
Supplement: Supplementary file 4 [file Table S3.pdf › Table S3.pdf]

Distribution Chart of Benthic Foraminifera (Species)

| Transitional | Inner Neritic | Middle Neritic | Outer Neritic | Upper Bathyal | Lower Bathyal | Sample Code    | <i>Amphistegina</i> sp. | <i>Amphistegina lessonii</i> | <i>Sphaerogypsina</i> sp. | <i>Amphistegina radiata</i> | <i>Amphistegina papillosa</i> | <i>Operculina</i> sp. | <i>Operculina philippinensis</i> | <i>Operculina ammonoides</i> | <i>Operculina subgranulosa</i> | <i>Operculina complanata</i> | <i>Amphistegina quoyii</i> | <i>Alveolinella quoyii</i> | <i>Calcarina calcarinoides</i> | <i>Ammonia</i> sp. | <i>Ammonia beccarii</i> | <i>Asterorotalia trispinosa</i> | <i>Elphidium</i> sp. | <i>Elphidium crispum</i> | <i>Elphidium hispidulum</i> | <i>Reussella simplex</i> | <i>Cellanthus craticulatus</i> | <i>Peneroplis carinatus</i> | <i>Peneroplis planatus</i> | <i>Peneroplis pertusus</i> | <i>Pseudorotalia</i> sp. | <i>Ammonia tepida</i> | <i>Elphidium neosimplex</i> | <i>Cibicides</i> sp. | <i>Ammonia gainardii</i> | <i>Adelosina laevigata</i> |  |  |
|--------------|---------------|----------------|---------------|---------------|---------------|----------------|-------------------------|------------------------------|---------------------------|-----------------------------|-------------------------------|-----------------------|----------------------------------|------------------------------|--------------------------------|------------------------------|----------------------------|----------------------------|--------------------------------|--------------------|-------------------------|---------------------------------|----------------------|--------------------------|-----------------------------|--------------------------|--------------------------------|-----------------------------|----------------------------|----------------------------|--------------------------|-----------------------|-----------------------------|----------------------|--------------------------|----------------------------|--|--|
|              |               |                |               |               |               | P.Bembang      | 24                      | 14                           |                           |                             |                               |                       |                                  |                              |                                |                              |                            | 46                         | 212                            | 134                | 8                       | 58                              | 74                   | 6                        | 4                           | 18                       | 6                              | 4                           | 4                          | 2                          |                          |                       |                             |                      |                          |                            |  |  |
|              |               |                |               |               |               | P. Parangireng | 1169                    | 192                          | 16426                     | 2674                        | 945                           |                       |                                  |                              |                                |                              |                            | 272                        | 304                            |                    |                         |                                 |                      |                          |                             | 48                       |                                |                             |                            |                            |                          |                       |                             |                      |                          |                            |  |  |
|              |               |                |               |               |               | SSTH1          |                         | 107                          |                           |                             | 107                           | 214                   | 214                              | 107                          |                                |                              |                            |                            | 19875                          | 1603               | 8896                    |                                 | 214                  | 107                      | 3847                        |                          | 107                            | 321                         | 107                        | 107                        | 641                      | 1496                  | 1069                        | 855                  | 641                      | 214                        |  |  |
|              |               |                |               |               |               | SSTH2          |                         | 58                           |                           |                             | 58                            |                       |                                  | 58                           | 58                             |                              |                            |                            | 117                            | 1344               |                         |                                 | 175                  | 58                       | 994                         | 58                       |                                | 58                          | 58                         |                            | 175                      | 10695                 |                             | 526                  |                          |                            |  |  |
|              |               |                |               |               |               | sem-A9         |                         |                              |                           |                             |                               | 11                    |                                  |                              |                                |                              |                            |                            |                                |                    | 8                       |                                 |                      |                          |                             |                          |                                |                             |                            |                            |                          | 355                   | 72                          | 30                   |                          |                            |  |  |
|              |               |                |               |               |               | sem-A21        |                         |                              |                           |                             |                               |                       |                                  |                              |                                |                              |                            |                            |                                | 186                |                         |                                 |                      | 31                       |                             |                          |                                |                             |                            |                            |                          | 634                   | 70                          |                      |                          |                            |  |  |
|              |               |                |               |               |               | sem-A11        |                         |                              |                           |                             |                               |                       |                                  |                              |                                |                              |                            |                            | 5                              | 707                | 49                      | 25                              |                      | 89                       |                             |                          |                                |                             |                            |                            |                          | 588                   | 15                          |                      |                          |                            |  |  |
|              |               |                |               |               |               | sem-A6         |                         |                              |                           |                             |                               |                       |                                  |                              |                                |                              |                            |                            | 41                             | 2091               | 984                     | 1722                            | 369                  |                          | 164                         |                          |                                |                             |                            |                            | 246                      | 2952                  | 328                         | 533                  |                          |                            |  |  |
|              |               |                |               |               |               | sem-A5         |                         |                              |                           |                             |                               |                       |                                  |                              |                                |                              |                            |                            | 83                             | 1718               | 559                     | 104                             | 373                  | 21                       | 21                          |                          |                                |                             |                            |                            | 104                      | 1946                  | 62                          |                      |                          |                            |  |  |
|              |               |                |               |               |               | SSTH8          |                         |                              |                           | 19                          | 103                           | 213                   | 65                               |                              |                                |                              |                            |                            |                                | 200                | 39                      |                                 | 26                   | 26                       |                             |                          | 6                              |                             |                            |                            | 149                      | 32                    | 52                          | 362                  |                          | 13                         |  |  |
|              |               |                |               |               |               | IKN 01         |                         |                              |                           |                             |                               |                       |                                  | 4                            |                                |                              |                            |                            |                                | 1                  |                         | 1                               |                      |                          |                             |                          |                                |                             |                            |                            | 4                        |                       | 1                           | 24                   | 4                        |                            |  |  |
|              |               |                |               |               |               | SS10           |                         |                              |                           |                             |                               |                       |                                  |                              |                                |                              |                            |                            | 1                              |                    | 3                       | 1                               |                      |                          |                             | 1                        |                                |                             |                            |                            | 19                       | 15                    |                             | 6                    |                          |                            |  |  |
|              |               |                |               |               |               | SS09           | 2                       |                              |                           |                             |                               | 4                     |                                  |                              |                                |                              |                            |                            | 47                             |                    | 2                       | 1                               |                      |                          |                             |                          |                                |                             |                            |                            | 3                        | 15                    |                             | 63                   |                          | 1                          |  |  |
|              |               |                |               |               |               | IKN 03         |                         | 8                            |                           |                             | 17                            | 2                     |                                  | 4                            | 2                              | 8                            | 3                          | 1                          |                                |                    |                         |                                 | 2                    | 2                        | 1                           |                          |                                |                             |                            |                            |                          |                       | 2                           |                      | 31                       | 1                          |  |  |
|              |               |                |               |               |               | CLP 03         | 5                       |                              |                           |                             |                               |                       |                                  |                              |                                |                              |                            |                            |                                |                    |                         |                                 |                      |                          |                             |                          |                                |                             |                            |                            |                          |                       | 10                          |                      | 96                       | 18                         |  |  |
|              |               |                |               |               |               | GC05           |                         |                              |                           |                             |                               |                       |                                  |                              |                                |                              |                            |                            |                                | 540                |                         |                                 |                      |                          |                             |                          |                                |                             |                            |                            |                          | 176                   |                             |                      | 100                      |                            |  |  |
|              |               |                |               |               |               | CLP 05         |                         |                              |                           | 11                          |                               |                       |                                  |                              |                                |                              |                            |                            |                                |                    |                         |                                 |                      | 22                       |                             |                          |                                |                             |                            |                            |                          |                       | 43                          |                      | 109                      | 152                        |  |  |
|              |               |                |               |               |               | CLP 06         |                         |                              |                           |                             | 3                             |                       |                                  | 1                            |                                |                              |                            |                            |                                |                    |                         |                                 |                      |                          |                             |                          |                                |                             |                            |                            |                          | 1                     |                             |                      | 7                        | 1                          |  |  |
|              |               |                |               |               |               | CLP 07         |                         |                              |                           | 1                           |                               |                       |                                  | 1                            |                                |                              |                            |                            |                                |                    |                         |                                 |                      |                          |                             |                          |                                |                             |                            |                            |                          |                       | 1                           |                      | 1                        | 1                          |  |  |
|              |               |                |               |               |               | IKN 04         |                         |                              |                           | 957                         | 3348                          | 2152                  |                                  | 3348                         |                                |                              |                            |                            | 239                            |                    |                         |                                 |                      |                          | 1435                        | 478                      |                                |                             |                            |                            | 1674                     |                       |                             | 8610                 |                          |                            |  |  |
|              |               |                |               |               |               | IKN 05         |                         |                              |                           |                             | 1                             | 1                     |                                  |                              | 1                              |                              |                            |                            |                                |                    |                         |                                 |                      |                          |                             |                          |                                |                             |                            |                            |                          | 1                     | 1                           |                      | 8                        |                            |  |  |
|              |               |                |               |               |               | Sim ST-14      |                         |                              |                           |                             |                               |                       |                                  |                              |                                |                              |                            |                            |                                |                    |                         |                                 |                      |                          |                             | 512                      |                                |                             |                            |                            |                          |                       |                             |                      | 2049                     |                            |  |  |
|              |               |                |               |               |               | Sum ST-09      |                         |                              |                           |                             |                               |                       |                                  |                              |                                |                              |                            |                            | 1025                           |                    |                         |                                 |                      |                          |                             | 513                      |                                |                             |                            |                            |                          |                       |                             | 513                  | 1538                     |                            |  |  |
|              |               |                |               |               |               | Sum ST-01      |                         |                              |                           |                             |                               |                       |                                  |                              |                                |                              |                            |                            |                                |                    |                         |                                 |                      |                          |                             |                          |                                |                             |                            |                            |                          |                       |                             |                      | 1024                     |                            |  |  |
|              |               |                |               |               |               | Sum ST-12      |                         |                              |                           |                             |                               |                       |                                  |                              |                                |                              |                            |                            |                                |                    |                         |                                 |                      |                          |                             |                          |                                |                             |                            |                            |                          |                       |                             |                      |                          |                            |  |  |
|              |               |                |               |               |               | Sum ST-06      |                         |                              |                           |                             |                               |                       |                                  |                              |                                |                              |                            |                            |                                |                    |                         |                                 |                      |                          |                             |                          |                                |                             |                            |                            |                          |                       |                             |                      |                          | 1793                       |  |  |
|              |               |                |               |               |               | OS1            |                         |                              |                           |                             |                               |                       |                                  |                              |                                |                              |                            |                            |                                |                    |                         |                                 |                      |                          |                             |                          |                                |                             |                            |                            |                          |                       |                             |                      |                          | 3073                       |  |  |
|              |               |                |               |               |               | Sum ST-13      |                         |                              |                           |                             |                               |                       |                                  |                              |                                |                              |                            |                            |                                |                    |                         |                                 |                      |                          |                             |                          |                                |                             |                            |                            |                          |                       |                             |                      |                          | 768                        |  |  |
|              |               |                |               |               |               | Sum ST-03      |                         |                              |                           |                             |                               |                       |                                  |                              |                                |                              |                            |                            |                                |                    |                         |                                 |                      |                          |                             |                          |                                |                             |                            |                            |                          |                       |                             |                      |                          |                            |  |  |
|              |               |                |               |               |               | Sum ST-11      |                         |                              |                           |                             |                               |                       |                                  |                              |                                |                              |                            |                            |                                |                    |                         |                                 |                      |                          |                             |                          |                                |                             |                            |                            |                          |                       |                             |                      |                          | 3073                       |  |  |
|              |               |                |               |               |               | OS10           |                         |                              |                           |                             |                               |                       |                                  |                              |                                |                              |                            |                            |                                |                    |                         |                                 |                      |                          |                             |                          |                                |                             |                            |                            |                          |                       |                             |                      |                          | 512                        |  |  |
|              |               |                |               |               |               | Sim ST-02      |                         |                              |                           |                             |                               |                       |                                  |                              |                                |                              |                            |                            |                                |                    |                         |                                 |                      |                          |                             |                          |                                |                             |                            |                            |                          |                       |                             |                      |                          |                            |  |  |
|              |               |                |               |               |               | Sim ST-08      |                         |                              |                           |                             |                               |                       |                                  |                              |                                |                              |                            |                            |                                |                    |                         |                                 |                      |                          |                             |                          |                                |                             |                            |                            |                          |                       |                             |                      |                          |                            |  |  |
|              |               |                |               |               |               | Sum ST-08      |                         |                              |                           |                             |                               |                       |                                  |                              |                                |                              |                            |                            |                                |                    |                         |                                 |                      |                          |                             |                          |                                |                             |                            |                            |                          |                       |                             |                      |                          | 4                          |  |  |
|              |               |                |               |               |               | OS7            |                         |                              |                           |                             |                               |                       |                                  |                              |                                |                              |                            |                            |                                |                    |                         |                                 |                      |                          |                             |                          |                                |                             |                            |                            |                          |                       |                             |                      | 8                        |                            |  |  |
|              |               |                |               |               |               |                | 1200                    | 379                          | 16426                     | 3642                        | 4497                          | 2487                  | 427                              | 3588                         | 61                             | 8                            | 3                          | 1                          | 318                            | 21949              | 8524                    | 10548                           | 2302                 | 1031                     | 5014                        | 2708                     | 658                            | 385                         | 169                        | 111                        | 3195                     | 18787                 | 2111                        | 25274                | 818                      | 228                        |  |  |

Distribution Chart of Benthic Foraminifera (Species)

| Transitional | Inner Neritic | Middle Neritic | Outer Neritic | Upper Bathyal | Lower Bathyal | Sample Code    | <i>Baggina indica</i> | <i>Brizalina</i> sp. | <i>Anomalina globulosa</i> | <i>Fissurina ampullacea</i> | <i>Oolina globosa</i> | <i>Bulimina marginata</i> | <i>Florilus boucanum</i> | <i>Bulimina gibba</i> | <i>Brizalina aenariensis</i> | <i>Nodosaria</i> sp. | <i>Hyalinea bhutica</i> | <i>Siphonina bradyi</i> | <i>Cassidulina</i> sp. | <i>Anomalina colligera</i> | <i>Nodosaria lepidula</i> | <i>Oridorsalis tenera</i> | <i>Sphaeroidina bulloides</i> | <i>Brizalina robusta</i> | <i>Fissurina</i> sp. | <i>Bolivinita quadrilatera</i> | <i>Siphonogenerina striata</i> | <i>Lagena sulcata</i> | <i>Cassidulina pacifica</i> | <i>Bulimina</i> sp. | <i>Cibicides refulgens</i> | <i>Anomalina</i> sp. | <i>Uvigerina</i> sp. | <i>Bolivina</i> sp. | <i>Lagena semilineata</i> | <i>Lagena laevis</i> | <i>Nonion scaphum</i> |     |     |      |   |      |     |      |  |
|--------------|---------------|----------------|---------------|---------------|---------------|----------------|-----------------------|----------------------|----------------------------|-----------------------------|-----------------------|---------------------------|--------------------------|-----------------------|------------------------------|----------------------|-------------------------|-------------------------|------------------------|----------------------------|---------------------------|---------------------------|-------------------------------|--------------------------|----------------------|--------------------------------|--------------------------------|-----------------------|-----------------------------|---------------------|----------------------------|----------------------|----------------------|---------------------|---------------------------|----------------------|-----------------------|-----|-----|------|---|------|-----|------|--|
|              |               |                |               |               |               | P.Bembang      |                       |                      |                            |                             |                       |                           |                          |                       |                              |                      |                         |                         |                        |                            |                           |                           |                               |                          |                      |                                |                                |                       |                             |                     |                            |                      |                      |                     |                           |                      |                       |     |     |      |   |      |     |      |  |
|              |               |                |               |               |               | P. Parangireng |                       |                      |                            |                             |                       |                           |                          |                       |                              |                      |                         |                         |                        |                            |                           |                           |                               |                          |                      |                                |                                |                       |                             |                     |                            |                      |                      |                     |                           |                      |                       |     |     |      |   |      |     |      |  |
|              |               |                |               |               |               | SSTH1          | 107                   |                      |                            |                             |                       |                           |                          |                       |                              |                      |                         |                         |                        |                            |                           |                           |                               |                          |                      |                                |                                |                       |                             |                     |                            |                      |                      |                     |                           |                      |                       |     |     |      |   |      |     |      |  |
|              |               |                |               |               |               | SSTH2          |                       | 351                  | 409                        | 234                         | 58                    | 58                        | 58                       | 58                    |                              |                      |                         |                         |                        |                            |                           |                           |                               |                          |                      |                                |                                |                       |                             |                     |                            |                      |                      |                     |                           |                      |                       |     |     |      |   |      |     |      |  |
|              |               |                |               |               |               | sem-A9         |                       |                      |                            |                             |                       | 23                        |                          |                       |                              |                      |                         |                         |                        | 11                         | 11                        | 8                         | 11                            | 8                        |                      | 4                              | 8                              | 8                     | 4                           | 23                  | 4                          |                      | 4                    | 4                   | 4                         |                      |                       |     |     |      |   |      |     |      |  |
|              |               |                |               |               |               | sem-A21        |                       | 15                   |                            |                             |                       |                           |                          |                       |                              |                      |                         |                         |                        | 23                         | 8                         |                           |                               |                          |                      |                                |                                |                       |                             | 456                 |                            |                      |                      |                     | 15                        | 15                   | 15                    |     |     |      |   |      |     |      |  |
|              |               |                |               |               |               | sem-A11        |                       | 20                   | 5                          |                             |                       | 10                        | 35                       |                       |                              |                      |                         |                         |                        | 44                         |                           |                           |                               |                          |                      |                                |                                |                       |                             |                     |                            |                      |                      |                     |                           | 15                   | 15                    |     | 5   | 5    |   |      |     |      |  |
|              |               |                |               |               |               | sem-A6         |                       | 82                   |                            |                             | 41                    | 287                       | 861                      |                       |                              |                      |                         |                         |                        | 615                        |                           |                           |                               |                          |                      |                                |                                |                       |                             |                     |                            |                      |                      |                     |                           | 41                   |                       |     |     | 41   |   |      |     |      |  |
|              |               |                |               |               |               | sem-A5         |                       | 41                   |                            | 62                          | 21                    | 83                        | 1263                     |                       |                              |                      |                         |                         |                        |                            |                           |                           |                               |                          |                      |                                |                                |                       |                             |                     |                            |                      |                      |                     |                           | 21                   |                       | 41  |     |      |   | 21   | 21  |      |  |
|              |               |                |               |               |               | SSTH8          |                       | 6                    |                            | 13                          | 6                     |                           |                          |                       |                              |                      |                         |                         |                        |                            |                           |                           |                               |                          |                      |                                |                                |                       |                             |                     |                            |                      |                      |                     |                           | 6                    |                       |     |     |      |   | 6    | 6   | 78   |  |
|              |               |                |               |               |               | IKN 01         |                       |                      |                            |                             | 1                     |                           |                          |                       |                              |                      |                         |                         |                        | 1                          |                           |                           |                               |                          |                      |                                |                                |                       |                             |                     |                            |                      |                      |                     |                           |                      |                       |     |     |      |   |      | 1   |      |  |
|              |               |                |               |               |               | SS10           |                       | 1                    | 1                          | 1                           |                       |                           |                          |                       |                              |                      |                         |                         |                        |                            | 5                         |                           |                               |                          |                      | 1                              | 2                              |                       |                             | 1                   | 1                          |                      |                      | 1                   |                           |                      |                       |     |     |      |   |      |     |      |  |
|              |               |                |               |               |               | SS09           |                       | 2                    | 1                          | 1                           | 9                     |                           |                          |                       |                              |                      |                         |                         |                        |                            | 10                        |                           |                               |                          |                      | 1                              |                                |                       |                             |                     |                            |                      |                      | 6                   |                           | 1                    |                       |     |     |      |   |      | 4   | 9    |  |
|              |               |                |               |               |               | IKN 03         |                       |                      | 1                          | 1                           |                       |                           | 1                        |                       |                              |                      |                         |                         |                        |                            | 12                        | 1                         | 1                             |                          | 1                    |                                |                                |                       |                             |                     |                            |                      |                      |                     | 1                         |                      |                       | 3   |     |      | 1 |      |     |      |  |
|              |               |                |               |               |               | CLP 03         |                       |                      | 8                          |                             |                       |                           |                          |                       |                              |                      |                         | 10                      |                        |                            | 13                        | 5                         | 3                             |                          |                      | 3                              |                                |                       |                             | 5                   | 8                          |                      |                      |                     | 10                        |                      |                       |     | 3   |      |   |      | 3   | 5    |  |
|              |               |                |               |               |               | GC05           |                       |                      |                            |                             | 13                    |                           |                          |                       |                              |                      |                         |                         |                        |                            | 1029                      |                           |                               |                          | 63                   |                                |                                |                       |                             |                     |                            |                      |                      |                     |                           |                      |                       |     |     |      |   |      | 13  | 13   |  |
|              |               |                |               |               |               | CLP 05         |                       |                      |                            |                             |                       |                           |                          |                       |                              |                      | 76                      |                         |                        |                            | 206                       | 65                        |                               |                          |                      | 11                             | 11                             |                       |                             |                     | 10                         |                      |                      |                     | 54                        |                      |                       |     |     |      |   |      |     | 43   |  |
|              |               |                |               |               |               | CLP 06         |                       |                      |                            |                             |                       |                           |                          |                       |                              |                      | 7                       |                         |                        |                            | 12                        | 1                         |                               |                          |                      |                                |                                |                       |                             |                     | 3                          |                      |                      |                     | 1                         |                      |                       |     |     |      |   |      |     |      |  |
|              |               |                |               |               |               | CLP 07         |                       |                      | 1                          |                             |                       |                           |                          |                       |                              |                      | 0                       |                         |                        |                            | 2                         | 1                         |                               |                          |                      |                                |                                |                       |                             |                     | 1                          |                      |                      |                     | 1                         |                      |                       |     |     | 1    |   |      |     | 1    |  |
|              |               |                |               |               |               | IKN 04         |                       |                      |                            |                             |                       |                           |                          |                       |                              |                      |                         |                         |                        |                            | 24155                     |                           |                               |                          |                      |                                |                                |                       |                             |                     |                            |                      |                      |                     | 1                         |                      |                       |     |     |      |   | 1196 |     | 239  |  |
|              |               |                |               |               |               | IKN 05         |                       |                      | 1                          |                             | 1                     |                           | 1                        |                       |                              |                      |                         |                         |                        |                            |                           |                           |                               | 1                        |                      |                                |                                |                       |                             |                     |                            |                      |                      |                     |                           |                      |                       |     |     |      |   |      |     |      |  |
|              |               |                |               |               |               | Sim ST-14      |                       |                      |                            |                             |                       |                           |                          |                       |                              |                      |                         |                         |                        |                            | 6146                      | 1024                      |                               |                          | 512                  |                                |                                |                       |                             |                     | 512                        |                      |                      |                     | 512                       | 1024                 |                       | 512 | 512 |      |   |      |     |      |  |
|              |               |                |               |               |               | Sum ST-09      |                       |                      | 3588                       | 513                         | 513                   | 513                       | 3588                     |                       |                              |                      |                         |                         |                        |                            | 5636                      |                           |                               |                          | 2050                 |                                |                                |                       |                             |                     | 2050                       |                      | 513                  |                     |                           |                      | 513                   |     |     | 512  |   |      | 513 | 1025 |  |
|              |               |                |               |               |               | Sum ST-01      |                       |                      | 512                        |                             |                       | 512                       | 4609                     |                       |                              |                      |                         |                         |                        |                            |                           |                           | 1024                          |                          |                      | 1536                           |                                |                       |                             |                     | 4097                       |                      | 2048                 |                     |                           |                      |                       |     |     | 512  |   |      |     |      |  |
|              |               |                |               |               |               | Sum ST-12      |                       |                      |                            |                             |                       | 64                        | 128                      |                       |                              |                      |                         |                         |                        |                            |                           |                           |                               |                          |                      | 385                            |                                |                       |                             |                     |                            |                      |                      |                     |                           |                      |                       |     |     |      |   |      |     |      |  |
|              |               |                |               |               |               | Sum ST-06      |                       |                      | 256                        |                             |                       | 768                       | 1281                     |                       |                              |                      |                         |                         |                        |                            |                           | 256                       | 3073                          |                          |                      |                                |                                |                       |                             |                     |                            |                      |                      |                     |                           |                      |                       |     |     |      |   |      |     |      |  |
|              |               |                |               |               |               | OS1            |                       |                      | 1539                       |                             |                       |                           | 1026                     |                       |                              |                      |                         |                         |                        |                            |                           |                           |                               |                          |                      | 3078                           |                                |                       |                             | 513                 | 1539                       |                      | 2565                 |                     |                           | 1539                 |                       |     |     | 1539 |   |      |     |      |  |
|              |               |                |               |               |               | Sum ST-13      |                       |                      | 256                        |                             |                       |                           | 256                      |                       |                              |                      |                         |                         |                        |                            |                           |                           | 512                           |                          |                      | 1024                           |                                |                       |                             |                     | 256                        |                      | 1280                 |                     |                           |                      |                       |     |     | 512  |   |      |     |      |  |
|              |               |                |               |               |               | Sum ST-03      |                       |                      |                            |                             | 16                    |                           | 144                      |                       |                              |                      |                         |                         |                        |                            |                           |                           |                               |                          |                      | 16                             |                                |                       |                             |                     | 32                         |                      |                      |                     |                           |                      |                       |     |     | 24   |   |      |     |      |  |
|              |               |                |               |               |               | Sum ST-11      |                       |                      | 512                        |                             |                       |                           | 1536                     |                       |                              |                      |                         |                         |                        |                            |                           |                           |                               |                          |                      | 512                            |                                |                       |                             |                     | 1024                       |                      |                      |                     |                           |                      |                       |     |     | 1024 |   |      |     |      |  |
|              |               |                |               |               |               | OS10           |                       |                      | 512                        |                             |                       |                           | 512                      |                       |                              |                      |                         |                         |                        |                            |                           |                           |                               |                          |                      | 512                            |                                |                       |                             |                     |                            |                      |                      |                     |                           |                      |                       |     |     |      |   |      |     |      |  |
|              |               |                |               |               |               | Sim ST-02      |                       |                      |                            |                             |                       |                           |                          |                       |                              |                      |                         |                         |                        |                            |                           | 10                        |                               |                          |                      |                                |                                |                       |                             |                     |                            | 2                    |                      |                     |                           |                      |                       |     |     |      |   |      |     |      |  |
|              |               |                |               |               |               | Sim ST-08      |                       |                      |                            |                             |                       |                           | 80                       |                       |                              |                      |                         |                         |                        |                            |                           |                           |                               |                          |                      |                                |                                |                       |                             |                     |                            |                      |                      |                     |                           |                      |                       |     |     |      |   |      | 16  |      |  |
|              |               |                |               |               |               | Sum ST-08      |                       |                      |                            |                             |                       | 1                         | 6                        |                       |                              |                      |                         |                         |                        | 1                          |                           |                           |                               |                          |                      |                                |                                |                       |                             |                     |                            |                      |                      |                     |                           |                      |                       |     |     |      |   |      |     |      |  |
|              |               |                |               |               |               | OS7            |                       |                      |                            |                             |                       |                           | 29                       |                       |                              |                      |                         |                         |                        |                            |                           |                           |                               |                          |                      |                                |                                |                       | 4                           |                     |                            |                      |                      |                     |                           |                      |                       |     |     |      |   |      |     | 401  |  |
|              |               |                |               |               |               | 877            | 6935                  | 942                  | 834                        | 2030                        | 13722                 | 2243                      | 60                       | 37992                 | 1383                         | 5005                 | 251                     | 2644                    | 7339                   | 79                         | 8                         | 1552                      | 16394                         | 7                        | 7819                 | 4                              | 78                             | 528                   | 3240                        | 19                  | 561                        | 4258                 | 1238                 | 557                 | 1071                      | 401                  |                       |     |     |      |   |      |     |      |  |

Distribution Chart of Benthic Foraminifera (Species)

| Transitional | Inner Neritic | Middle Neritic | Outer Neritic | Upper Bathyal | Lower Bathyal | Sample Code    | <i>Cancris auriculus</i> | <i>Neonovigerina ampullacea</i> | <i>Calcarina splengeri</i> | <i>Oolina striata</i> | <i>Discorbis</i> sp. | <i>Lagena substriata</i> | <i>Siphonaperta</i> sp. | <i>Heterolepa praecincta</i> | <i>Bombulina echinata</i> | <i>Brizalina striatula</i> | <i>Nonionella simplex</i> | <i>Elphidium advenum</i> | <i>Brizalina earlandi</i> | <i>Asterorotalia</i> sp. | <i>Lenticulina</i> sp. | <i>Baculogypsinioides spinosus</i> | <i>Planorbullinella larvata</i> | <i>Lenticulina vortex</i> | <i>Gyroidina neosoldanii</i> | <i>Astacolus crepidulus</i> | <i>Glandulina laevigata</i> | <i>Siphonina tubulosa</i> | <i>Valvulina pennatula</i> | <i>Gyroidina broeckhiana</i> | <i>Lenticulina orbicularis</i> | <i>Planularia australis</i> | <i>Saracenaria italica</i> | <i>Eponides schreibersi</i> | <i>Guttulina problema</i> | <i>Brizalina alata</i> | <i>Nodosaria albatrossi</i> | <i>Lenticulina calcar</i> | <i>Siphogenerina tropica</i> | <i>Amphicoryna scalaris</i> |      |   |   |      |   |      |  |
|--------------|---------------|----------------|---------------|---------------|---------------|----------------|--------------------------|---------------------------------|----------------------------|-----------------------|----------------------|--------------------------|-------------------------|------------------------------|---------------------------|----------------------------|---------------------------|--------------------------|---------------------------|--------------------------|------------------------|------------------------------------|---------------------------------|---------------------------|------------------------------|-----------------------------|-----------------------------|---------------------------|----------------------------|------------------------------|--------------------------------|-----------------------------|----------------------------|-----------------------------|---------------------------|------------------------|-----------------------------|---------------------------|------------------------------|-----------------------------|------|---|---|------|---|------|--|
|              |               |                |               |               |               | P. Bambang     |                          |                                 |                            |                       |                      |                          |                         |                              |                           |                            |                           |                          |                           |                          |                        |                                    |                                 |                           |                              |                             |                             |                           |                            |                              |                                |                             |                            |                             |                           |                        |                             |                           |                              |                             |      |   |   |      |   |      |  |
|              |               |                |               |               |               | P. Parangireng |                          |                                 |                            |                       |                      |                          |                         |                              |                           |                            |                           |                          |                           |                          |                        |                                    |                                 |                           |                              |                             |                             |                           |                            |                              |                                |                             |                            |                             |                           |                        |                             |                           |                              |                             |      |   |   |      |   |      |  |
|              |               |                |               |               |               | SSTH1          |                          |                                 |                            |                       |                      |                          |                         |                              |                           |                            |                           |                          |                           |                          |                        |                                    |                                 |                           |                              |                             |                             |                           |                            |                              |                                |                             |                            |                             |                           |                        |                             |                           |                              |                             |      |   |   |      |   |      |  |
|              |               |                |               |               |               | SSTH2          |                          |                                 |                            |                       |                      |                          |                         |                              |                           |                            |                           |                          |                           |                          |                        |                                    |                                 |                           |                              |                             |                             |                           |                            |                              |                                |                             |                            |                             |                           |                        |                             |                           |                              |                             |      |   |   |      |   |      |  |
|              |               |                |               |               |               | sem-A9         |                          |                                 |                            |                       |                      |                          |                         |                              |                           |                            |                           |                          |                           |                          |                        |                                    |                                 |                           |                              |                             |                             |                           |                            |                              |                                |                             |                            |                             |                           |                        |                             |                           |                              |                             |      |   |   |      |   |      |  |
|              |               |                |               |               |               | sem-A21        |                          |                                 |                            |                       |                      |                          |                         |                              |                           |                            |                           |                          |                           |                          |                        |                                    |                                 |                           |                              |                             |                             |                           |                            |                              |                                |                             |                            |                             |                           |                        |                             |                           |                              |                             |      |   |   |      |   |      |  |
|              |               |                |               |               |               | sem-A11        |                          |                                 |                            |                       |                      |                          |                         |                              |                           |                            |                           |                          |                           |                          |                        |                                    |                                 |                           |                              |                             |                             |                           |                            |                              |                                |                             |                            |                             |                           |                        |                             |                           |                              |                             |      |   |   |      |   |      |  |
|              |               |                |               |               |               | sem-A6         |                          |                                 |                            |                       |                      |                          |                         |                              |                           |                            |                           |                          |                           |                          |                        |                                    |                                 |                           |                              |                             |                             |                           |                            |                              |                                |                             |                            |                             |                           |                        |                             |                           |                              |                             |      |   |   |      |   |      |  |
|              |               |                |               |               |               | sem-A5         |                          |                                 |                            |                       |                      |                          |                         |                              |                           |                            |                           |                          |                           |                          |                        |                                    |                                 |                           |                              |                             |                             |                           |                            |                              |                                |                             |                            |                             |                           |                        |                             |                           |                              |                             |      |   |   |      |   |      |  |
|              |               |                |               |               |               | SSTH8          | 6                        | 19                              | 6                          | 6                     | 6                    | 6                        | 13                      |                              |                           |                            |                           |                          |                           |                          |                        |                                    |                                 |                           |                              |                             |                             |                           |                            |                              |                                |                             |                            |                             |                           |                        |                             |                           |                              |                             |      |   |   |      |   |      |  |
|              |               |                |               |               |               | IKN 01         | 1                        | 1                               |                            |                       |                      |                          |                         | 9                            | 1                         |                            | 1                         |                          |                           |                          |                        |                                    |                                 |                           |                              |                             |                             |                           |                            |                              |                                |                             |                            |                             |                           |                        |                             |                           |                              |                             |      |   |   |      |   |      |  |
|              |               |                |               |               |               | SS10           | 2                        | 6                               |                            | 2                     |                      | 1                        |                         |                              |                           |                            |                           |                          |                           | 1                        |                        | 1                                  | 1                               | 4                         |                              |                             |                             |                           |                            |                              |                                |                             |                            |                             |                           |                        |                             |                           |                              |                             |      |   |   |      |   |      |  |
|              |               |                |               |               |               | SS09           |                          |                                 |                            |                       |                      |                          |                         |                              |                           |                            |                           |                          |                           |                          |                        |                                    |                                 | 20                        | 1                            |                             |                             |                           |                            |                              |                                |                             |                            |                             |                           |                        |                             |                           |                              |                             |      |   |   |      |   |      |  |
|              |               |                |               |               |               | IKN 03         |                          | 4                               | 1                          |                       |                      |                          |                         |                              | 26                        |                            |                           |                          |                           |                          |                        |                                    |                                 |                           |                              |                             | 1                           | 1                         | 1                          | 1                            | 1                              | 1                           | 1                          | 1                           |                           |                        |                             |                           |                              |                             |      |   |   |      |   |      |  |
|              |               |                |               |               |               | CLP 03         |                          | 3                               |                            |                       | 3                    |                          |                         |                              |                           |                            |                           |                          |                           |                          |                        | 16                                 |                                 |                           |                              |                             |                             |                           |                            |                              |                                |                             |                            |                             | 8                         | 23                     | 10                          | 3                         | 3                            | 5                           | 3    | 3 | 5 | 5    | 3 | 3    |  |
|              |               |                |               |               |               | GC05           |                          | 239                             |                            |                       |                      | 13                       |                         |                              |                           |                            |                           |                          |                           |                          |                        |                                    |                                 |                           | 163                          |                             | 50                          |                           |                            |                              |                                |                             |                            |                             |                           |                        |                             |                           |                              |                             |      |   |   |      |   | 13   |  |
|              |               |                |               |               |               | CLP 05         |                          |                                 |                            |                       |                      |                          |                         |                              |                           |                            |                           |                          |                           | 11                       |                        | 43                                 |                                 |                           | 33                           |                             |                             |                           |                            |                              |                                |                             |                            |                             |                           | 22                     | 43                          |                           |                              | 11                          |      |   |   |      |   | 54   |  |
|              |               |                |               |               |               | CLP 06         |                          |                                 |                            |                       |                      |                          |                         |                              |                           |                            |                           |                          |                           |                          |                        | 1                                  |                                 |                           |                              |                             |                             |                           |                            |                              |                                |                             |                            |                             |                           | 2                      | 2                           | 1                         | 1                            |                             |      |   | 1 |      |   | 1    |  |
|              |               |                |               |               |               | CLP 07         |                          | 1                               |                            |                       |                      |                          |                         |                              |                           |                            |                           |                          |                           | 1                        |                        | 1                                  |                                 |                           |                              |                             | 1                           |                           |                            |                              | 1                              |                             |                            |                             |                           |                        | 1                           |                           |                              |                             |      |   | 1 |      |   | 1    |  |
|              |               |                |               |               |               | IKN 04         |                          | 1213                            | 478                        |                       |                      |                          |                         |                              | 478                       |                            |                           |                          |                           | 957                      |                        | 957                                |                                 |                           |                              |                             |                             |                           |                            |                              |                                |                             |                            | 239                         |                           | 5740                   | 478                         |                           |                              |                             |      |   |   |      |   |      |  |
|              |               |                |               |               |               | IKN 05         |                          |                                 |                            |                       |                      |                          |                         |                              |                           |                            |                           |                          |                           |                          |                        | 1                                  |                                 |                           |                              |                             | 1                           |                           |                            |                              | 1                              |                             |                            |                             |                           |                        | 1                           |                           | 1                            |                             |      |   | 1 |      |   | 1    |  |
|              |               |                |               |               |               | Sim ST-14      |                          | 3073                            |                            |                       |                      |                          |                         |                              | 2049                      |                            |                           |                          |                           |                          |                        |                                    |                                 |                           |                              |                             | 1024                        |                           |                            |                              | 1024                           |                             |                            |                             |                           |                        |                             | 2049                      | 512                          |                             |      |   |   | 1    |   |      |  |
|              |               |                |               |               |               | Sum ST-09      |                          |                                 |                            |                       |                      |                          |                         |                              |                           | 513                        |                           | 1025                     |                           |                          |                        | 513                                |                                 |                           |                              |                             | 513                         |                           |                            |                              |                                |                             |                            |                             |                           | 1025                   | 1025                        |                           | 513                          |                             |      |   |   | 2561 |   | 513  |  |
|              |               |                |               |               |               | Sum ST-01      |                          |                                 |                            |                       | 512                  |                          |                         |                              |                           |                            |                           | 512                      |                           |                          |                        |                                    |                                 |                           |                              |                             | 512                         |                           |                            |                              | 1024                           |                             |                            |                             | 512                       |                        |                             |                           |                              |                             |      |   |   |      |   |      |  |
|              |               |                |               |               |               | Sum ST-12      |                          |                                 |                            |                       |                      |                          |                         |                              |                           |                            |                           |                          | 128                       |                          |                        |                                    |                                 |                           |                              |                             |                             |                           |                            |                              |                                |                             |                            |                             | 128                       |                        |                             |                           |                              |                             |      |   |   |      |   |      |  |
|              |               |                |               |               |               | Sum ST-06      |                          |                                 |                            |                       |                      |                          |                         |                              |                           |                            |                           |                          |                           |                          |                        |                                    |                                 |                           |                              |                             |                             |                           |                            |                              |                                |                             |                            | 128                         |                           |                        |                             |                           |                              |                             |      |   |   |      |   |      |  |
|              |               |                |               |               |               | OS1            |                          |                                 |                            |                       |                      |                          |                         |                              |                           |                            |                           |                          |                           | 513                      |                        |                                    |                                 |                           |                              |                             | 513                         |                           |                            |                              |                                |                             |                            |                             |                           |                        | 3591                        |                           |                              |                             |      |   |   |      |   | 2565 |  |
|              |               |                |               |               |               | Sum ST-13      |                          |                                 |                            |                       |                      |                          |                         |                              |                           |                            |                           |                          |                           |                          |                        |                                    |                                 |                           |                              |                             |                             |                           |                            |                              |                                |                             |                            |                             |                           |                        | 512                         |                           |                              |                             |      |   |   |      |   |      |  |
|              |               |                |               |               |               | Sum ST-03      |                          |                                 |                            |                       |                      |                          |                         |                              |                           |                            |                           |                          |                           |                          |                        |                                    |                                 |                           |                              |                             |                             |                           |                            |                              |                                |                             |                            |                             |                           |                        | 16                          |                           |                              |                             |      |   |   |      |   |      |  |
|              |               |                |               |               |               | Sum ST-11      |                          | 1024                            |                            |                       |                      |                          |                         |                              | 2048                      |                            |                           |                          |                           |                          |                        | 512                                |                                 |                           |                              |                             | 1536                        |                           |                            |                              |                                |                             |                            |                             | 1024                      |                        |                             |                           |                              |                             |      |   |   |      |   |      |  |
|              |               |                |               |               |               | OS10           |                          |                                 |                            |                       |                      |                          |                         |                              |                           |                            |                           |                          |                           |                          |                        |                                    |                                 |                           |                              |                             |                             |                           |                            |                              |                                |                             |                            |                             |                           |                        |                             |                           |                              |                             |      |   |   |      |   |      |  |
|              |               |                |               |               |               | Sim ST-02      |                          |                                 |                            |                       |                      |                          |                         |                              |                           |                            |                           |                          |                           | 6                        |                        |                                    |                                 |                           |                              |                             |                             |                           |                            |                              |                                |                             |                            |                             |                           |                        | 2                           |                           |                              |                             |      |   |   |      |   |      |  |
| Sim ST-08    |               |                |               |               |               |                |                          |                                 |                            |                       |                      |                          |                         |                              |                           |                            |                           |                          |                           |                          |                        |                                    |                                 |                           |                              |                             |                             |                           |                            |                              |                                |                             |                            |                             |                           |                        |                             |                           |                              |                             |      |   |   |      |   |      |  |
| Sum ST-08    |               |                |               |               |               |                |                          |                                 |                            |                       |                      |                          |                         |                              |                           |                            |                           |                          |                           |                          |                        |                                    |                                 |                           | 5                            |                             |                             |                           |                            |                              |                                |                             |                            |                             |                           |                        |                             |                           |                              |                             |      |   |   |      |   |      |  |
| OS7          |               |                |               |               |               |                |                          |                                 |                            |                       |                      |                          |                         |                              |                           |                            |                           |                          |                           |                          |                        |                                    |                                 |                           |                              |                             |                             |                           |                            |                              |                                |                             |                            |                             |                           |                        |                             |                           |                              |                             |      |   |   |      |   |      |  |
|              |               |                |               |               |               |                | 1033                     | 4559                            | 485                        | 520                   | 9                    | 20                       | 13                      | 5782                         | 2                         | 2556                       | 2                         | 1                        | 2201                      | 1                        | 4156                   | 1                                  | 1                               | 1                         | 1                            | 2056                        | 1                           | 1                         | 240                        | 1672                         | 6814                           | 9138                        | 3                          | 1029                        | 16                        | 3                      | 3                           | 7                         | 3080                         | 4                           | 2636 |   |   |      |   |      |  |

Distribution Chart of Benthic Foraminifera (Species)

| Transitional | Inner Neritic | Middle Neritic | Outer Neritic | Upper Bathyal | Lower Bathyal | Sample Code    | <i>Nodosaria catesbyi</i> | <i>Virgulina pauciloculata</i> | <i>Heterolepa subhaldingeri</i> | <i>Trifarina bradyi</i> | <i>Hoeglundina elegans</i> | <i>Planularia</i> sp. | <i>Neovigierina</i> sp. | <i>Dentalina communis</i> | <i>Amphicoryna separans</i> | <i>Eponides procera</i> | <i>Lenticulina peregrina</i> | <i>Nonion suburgidum</i> | <i>Vaginulina</i> sp. | <i>Cassidulina laevigata</i> | <i>Nodosaria radicola</i> | <i>Uvigerina peregrina</i> | <i>Siphogenerina</i> sp. | <i>Uvigerina schwageri</i> | <i>Pullenia subcarinata</i> | <i>Lingulina galapagoensis</i> | <i>Eponides</i> sp. | <i>Dentalina</i> sp. | <i>Rectobolivina bifrons</i> | <i>Uvigerina asperula</i> | <i>Discorbina orbicularis</i> | <i>Globocassidulina</i> sp. | <i>Planularia gemmata</i> | <i>Hemirobulina galapagoensis</i> | <i>Siphogenerina dimorpha</i> | <i>Siphogenerina collumellaris</i> | <i>Siphonina</i> sp. |      |      |     |     |      |      |      |     |
|--------------|---------------|----------------|---------------|---------------|---------------|----------------|---------------------------|--------------------------------|---------------------------------|-------------------------|----------------------------|-----------------------|-------------------------|---------------------------|-----------------------------|-------------------------|------------------------------|--------------------------|-----------------------|------------------------------|---------------------------|----------------------------|--------------------------|----------------------------|-----------------------------|--------------------------------|---------------------|----------------------|------------------------------|---------------------------|-------------------------------|-----------------------------|---------------------------|-----------------------------------|-------------------------------|------------------------------------|----------------------|------|------|-----|-----|------|------|------|-----|
|              |               |                |               |               |               | P. Bembang     |                           |                                |                                 |                         |                            |                       |                         |                           |                             |                         |                              |                          |                       |                              |                           |                            |                          |                            |                             |                                |                     |                      |                              |                           |                               |                             |                           |                                   |                               |                                    |                      |      |      |     |     |      |      |      |     |
|              |               |                |               |               |               | P. Parangireng |                           |                                |                                 |                         |                            |                       |                         |                           |                             |                         |                              |                          |                       |                              |                           |                            |                          |                            |                             |                                |                     |                      |                              |                           |                               |                             |                           |                                   |                               |                                    |                      |      |      |     |     |      |      |      |     |
|              |               |                |               |               |               | SSTH1          |                           |                                |                                 |                         |                            |                       |                         |                           |                             |                         |                              |                          |                       |                              |                           |                            |                          |                            |                             |                                |                     |                      |                              |                           |                               |                             |                           |                                   |                               |                                    |                      |      |      |     |     |      |      |      |     |
|              |               |                |               |               |               | SSTH2          |                           |                                |                                 |                         |                            |                       |                         |                           |                             |                         |                              |                          |                       |                              |                           |                            |                          |                            |                             |                                |                     |                      |                              |                           |                               |                             |                           |                                   |                               |                                    |                      |      |      |     |     |      |      |      |     |
|              |               |                |               |               |               | sem-A9         |                           |                                |                                 |                         |                            |                       |                         |                           |                             |                         |                              |                          |                       |                              |                           |                            |                          |                            |                             |                                |                     |                      |                              |                           |                               |                             |                           |                                   |                               |                                    |                      |      |      |     |     |      |      |      |     |
|              |               |                |               |               |               | sem-A21        |                           |                                |                                 |                         |                            |                       |                         |                           |                             |                         |                              |                          |                       |                              |                           |                            |                          |                            |                             |                                |                     |                      |                              |                           |                               |                             |                           |                                   |                               |                                    |                      |      |      |     |     |      |      |      |     |
|              |               |                |               |               |               | sem-A11        |                           |                                |                                 |                         |                            |                       |                         |                           |                             |                         |                              |                          |                       |                              |                           |                            |                          |                            |                             |                                |                     |                      |                              |                           |                               |                             |                           |                                   |                               |                                    |                      |      |      |     |     |      |      |      |     |
|              |               |                |               |               |               | sem-A6         |                           |                                |                                 |                         |                            |                       |                         |                           |                             |                         |                              |                          |                       |                              |                           |                            |                          |                            |                             |                                |                     |                      |                              |                           |                               |                             |                           |                                   |                               |                                    |                      |      |      |     |     |      |      |      |     |
|              |               |                |               |               |               | sem-A5         |                           |                                |                                 |                         |                            |                       |                         |                           |                             |                         |                              |                          |                       |                              |                           |                            |                          |                            |                             |                                |                     |                      |                              |                           |                               |                             |                           |                                   |                               |                                    |                      |      |      |     |     |      |      |      |     |
|              |               |                |               |               |               | SSTH8          |                           |                                |                                 |                         |                            |                       |                         |                           |                             |                         |                              |                          |                       |                              |                           |                            |                          |                            |                             |                                |                     |                      |                              |                           |                               |                             |                           |                                   |                               |                                    |                      |      |      |     |     |      |      |      |     |
|              |               |                |               |               |               | IKN 01         |                           |                                |                                 |                         |                            |                       |                         |                           |                             |                         |                              |                          |                       |                              |                           |                            |                          |                            |                             |                                |                     |                      |                              |                           |                               |                             |                           |                                   |                               |                                    |                      |      |      |     |     |      |      |      |     |
|              |               |                |               |               |               | SS10           |                           |                                |                                 |                         |                            |                       |                         |                           |                             |                         |                              |                          |                       |                              |                           |                            |                          |                            |                             |                                |                     |                      |                              |                           |                               |                             |                           |                                   |                               |                                    |                      |      |      |     |     |      |      |      |     |
|              |               |                |               |               |               | SS09           |                           |                                |                                 |                         |                            |                       |                         |                           |                             |                         |                              |                          |                       |                              |                           |                            |                          |                            |                             |                                |                     |                      |                              |                           |                               |                             |                           |                                   |                               |                                    |                      |      |      |     |     |      |      |      |     |
|              |               |                |               |               |               | IKN 03         |                           |                                |                                 |                         |                            |                       |                         |                           |                             |                         |                              |                          |                       |                              |                           |                            |                          |                            |                             |                                |                     |                      |                              |                           |                               |                             |                           |                                   |                               |                                    |                      |      |      |     |     |      |      |      |     |
|              |               |                |               |               |               | CLP 03         |                           |                                |                                 |                         | 8                          |                       |                         |                           |                             |                         |                              |                          |                       |                              |                           |                            |                          |                            |                             |                                |                     |                      |                              |                           |                               |                             |                           |                                   |                               |                                    |                      |      |      |     |     |      |      |      |     |
|              |               |                |               |               |               | GC05           |                           |                                |                                 |                         |                            | 38                    |                         |                           |                             |                         |                              |                          |                       |                              |                           |                            |                          |                            |                             |                                |                     |                      |                              |                           |                               |                             |                           |                                   |                               |                                    |                      |      |      |     |     |      |      |      |     |
|              |               |                |               |               |               | CLP 05         |                           |                                |                                 |                         |                            |                       | 11                      | 11                        |                             | 33                      |                              | 11                       | 22                    |                              | 11                        |                            | 11                       |                            |                             |                                |                     |                      |                              |                           |                               |                             |                           |                                   |                               |                                    |                      |      |      |     |     |      |      |      |     |
|              |               |                |               |               |               | CLP 06         |                           |                                |                                 |                         |                            | 1                     |                         |                           |                             |                         |                              |                          | 1                     |                              |                           |                            | 1                        |                            | 2                           |                                |                     |                      |                              |                           |                               |                             |                           |                                   |                               |                                    |                      |      |      |     |     |      |      |      |     |
|              |               |                |               |               |               | CLP 07         |                           |                                |                                 |                         |                            |                       |                         |                           |                             |                         |                              |                          |                       |                              |                           |                            |                          |                            | 1                           |                                | 1                   |                      | 1                            |                           |                               |                             |                           |                                   |                               |                                    |                      |      |      |     |     |      |      |      |     |
|              |               |                |               |               |               | IKN 04         |                           |                                |                                 |                         |                            |                       |                         |                           |                             |                         |                              |                          |                       |                              |                           |                            |                          |                            |                             | 478                            |                     |                      |                              | 478                       |                               |                             |                           |                                   |                               |                                    |                      |      |      |     |     |      |      |      |     |
|              |               |                |               |               |               | IKN 05         |                           |                                |                                 |                         |                            |                       |                         | 1                         |                             |                         |                              |                          | 1                     |                              | 1                         |                            |                          |                            |                             | 1                              |                     | 1                    |                              | 1                         | 1                             | 1                           | 1                         | 1                                 | 1                             | 1                                  |                      |      |      |     |     |      |      |      |     |
|              |               |                |               |               |               | Sim ST-14      |                           |                                |                                 |                         |                            |                       |                         |                           |                             |                         | 3585                         |                          |                       |                              |                           |                            | 1024                     |                            |                             |                                |                     | 3585                 |                              |                           |                               |                             |                           | 1537                              | 2049                          |                                    |                      | 6659 | 512  | 512 | 512 | 512  | 1024 | 1537 | 512 |
|              |               |                |               |               |               | Sum ST-09      |                           |                                |                                 |                         |                            |                       |                         |                           |                             |                         |                              | 513                      |                       |                              | 513                       |                            |                          |                            |                             |                                |                     |                      |                              |                           |                               |                             |                           |                                   |                               | 1538                               | 9738                 |      | 1025 |     |     | 513  |      |      |     |
|              |               |                |               |               |               | Sum ST-01      |                           |                                |                                 |                         |                            |                       |                         |                           |                             |                         | 1536                         |                          |                       | 1024                         |                           |                            |                          |                            |                             | 512                            |                     | 1536                 |                              |                           |                               | 1024                        |                           | 512                               |                               | 512                                | 4097                 |      |      |     |     |      |      |      |     |
|              |               |                |               |               |               | Sum ST-12      |                           |                                |                                 |                         |                            |                       |                         |                           |                             |                         |                              |                          |                       |                              |                           |                            |                          |                            |                             |                                |                     |                      |                              |                           |                               |                             |                           |                                   |                               |                                    |                      |      |      |     |     |      |      |      |     |
|              |               |                |               |               |               | Sum ST-06      |                           |                                |                                 |                         |                            |                       |                         |                           |                             |                         |                              |                          | 256                   | 512                          |                           |                            |                          |                            |                             |                                |                     | 512                  |                              |                           |                               |                             |                           |                                   | 256                           | 512                                | 1024                 |      |      |     |     |      |      |      |     |
|              |               |                |               |               |               | OS1            |                           |                                |                                 |                         |                            |                       |                         |                           |                             |                         | 513                          |                          |                       |                              | 513                       |                            | 513                      |                            |                             |                                | 8721                |                      |                              |                           |                               |                             |                           |                                   | 1026                          | 513                                | 1026                 |      | 1026 |     |     | 1026 |      |      |     |
|              |               |                |               |               |               | Sum ST-13      |                           |                                |                                 |                         |                            |                       |                         |                           |                             |                         | 1024                         |                          |                       | 256                          |                           |                            |                          |                            |                             |                                | 256                 |                      |                              |                           |                               |                             |                           |                                   |                               |                                    |                      |      |      |     |     |      |      |      |     |
|              |               |                |               |               |               | Sum ST-03      |                           |                                |                                 |                         |                            |                       |                         |                           |                             |                         | 24                           |                          | 8                     |                              |                           |                            |                          |                            |                             |                                |                     |                      |                              |                           |                               |                             |                           |                                   |                               |                                    |                      |      |      |     |     |      |      |      |     |
|              |               |                |               |               |               | Sum ST-11      |                           |                                |                                 |                         |                            |                       |                         |                           |                             |                         | 1536                         | 512                      |                       | 3073                         |                           |                            |                          |                            |                             |                                | 1024                | 512                  | 1024                         |                           |                               |                             |                           |                                   |                               | 2048                               |                      | 512  |      |     |     |      |      |      |     |
|              |               |                |               |               |               | OS10           |                           |                                |                                 |                         |                            |                       |                         |                           |                             |                         |                              |                          |                       |                              |                           |                            |                          |                            | 512                         |                                |                     | 512                  |                              |                           |                               |                             |                           |                                   |                               |                                    |                      |      |      |     |     |      |      |      |     |
|              |               |                |               |               |               | Sim ST-02      |                           |                                |                                 |                         |                            |                       |                         |                           |                             |                         |                              |                          |                       | 2                            |                           |                            |                          |                            |                             |                                |                     |                      |                              |                           |                               | 8                           |                           |                                   |                               |                                    |                      |      |      |     |     |      |      |      |     |
| Sim ST-08    |               |                |               |               |               |                |                           |                                |                                 |                         |                            |                       |                         |                           |                             |                         |                              |                          |                       |                              |                           | 224                        |                          |                            |                             | 16                             |                     |                      |                              |                           |                               |                             |                           |                                   |                               |                                    |                      |      |      |     |     |      |      |      |     |
| Sum ST-08    |               |                |               |               |               |                |                           |                                |                                 |                         | 18                         |                       |                         | 1                         |                             |                         |                              |                          |                       |                              |                           |                            |                          |                            |                             |                                |                     |                      |                              |                           |                               |                             |                           | 1                                 |                               |                                    |                      |      |      |     |     |      |      |      |     |
| OS7          |               |                |               |               |               |                |                           | 4                              |                                 |                         |                            |                       |                         |                           |                             | 17                      |                              |                          |                       |                              |                           | 12                         |                          |                            |                             | 4                              |                     |                      |                              |                           |                               |                             |                           |                                   |                               |                                    |                      |      |      |     |     |      |      |      |     |
|              |               |                |               |               |               |                | 8                         | 42                             | 11                              | 12                      | 8270                       | 1035                  | 288                     | 5392                      | 525                         | 18                      | 1538                         | 2                        | 514                   | 992                          | 1025                      | 15874                      | 1                        | 1504                       | 1053                        | 1                              | 2050                | 3332                 | 3076                         | 24593                     | 512                           | 3077                        | 512                       | 512                               | 2563                          | 1537                               | 512                  |      |      |     |     |      |      |      |     |

Distribution Chart of Benthic Foraminifera (Species)

| Transitional | Inner Neritic | Middle Neritic | Outer Neritic | Upper Bathyal | Lower Bathyal | Sample Code    | <i>Sigmoilopsis schlumbergeri</i> | <i>Bolivinita subangularis</i> | <i>Astacolus insolitus</i> | <i>Bolivina hanikeniana</i> | <i>Bigenierina nodosaria</i> | <i>Oridorsalis umbonatus</i> | <i>Ammonia supera</i> | <i>Globobulimina notovata</i> | <i>Planulina ariminensis</i> | <i>Pyrgo lucermula</i> | <i>Globobulimina pacifica</i> | <i>Ceratobulimina contraria</i> | <i>Amphicoryna</i> sp. | <i>Lagena hispidula</i> | <i>Marginalina obesa</i> | <i>Planulina</i> sp. | <i>Ceratocancri clifdenensis</i> | <i>Astacolus</i> sp. | <i>Lenticulina iota</i> | <i>Amphicoryna hirsuta</i> | <i>Laticarinina pauperata</i> | <i>Nodosaria flintii</i> | <i>Planulina wuellerstorfi</i> | <i>Lagena</i> sp. | <i>Bulimina aculeata</i> | <i>Fissurina unguiculata</i> | <i>Quinqueloculina</i> sp. | <i>Quinqueloculina granulocostata</i> | <i>Quinqueloculina lamarkiana</i> | <i>Quinqueloculina crassiscarinata</i> | <i>Quinqueloculina angulariformis</i> |      |     |      |     |  |  |
|--------------|---------------|----------------|---------------|---------------|---------------|----------------|-----------------------------------|--------------------------------|----------------------------|-----------------------------|------------------------------|------------------------------|-----------------------|-------------------------------|------------------------------|------------------------|-------------------------------|---------------------------------|------------------------|-------------------------|--------------------------|----------------------|----------------------------------|----------------------|-------------------------|----------------------------|-------------------------------|--------------------------|--------------------------------|-------------------|--------------------------|------------------------------|----------------------------|---------------------------------------|-----------------------------------|----------------------------------------|---------------------------------------|------|-----|------|-----|--|--|
|              |               |                |               |               |               | P. Bambang     |                                   |                                |                            |                             |                              |                              |                       |                               |                              |                        |                               |                                 |                        |                         |                          |                      |                                  |                      |                         |                            |                               |                          |                                |                   |                          |                              | 16                         |                                       |                                   |                                        |                                       |      |     |      |     |  |  |
|              |               |                |               |               |               | P. Parangireng |                                   |                                |                            |                             |                              |                              |                       |                               |                              |                        |                               |                                 |                        |                         |                          |                      |                                  |                      |                         |                            |                               |                          |                                |                   |                          |                              |                            |                                       |                                   |                                        | 256                                   | 288  |     |      |     |  |  |
|              |               |                |               |               |               | SSTH1          |                                   |                                |                            |                             |                              |                              |                       |                               |                              |                        |                               |                                 |                        |                         |                          |                      |                                  |                      |                         |                            |                               |                          |                                |                   |                          |                              |                            |                                       |                                   |                                        | 321                                   | 107  | 855 | 214  | 107 |  |  |
|              |               |                |               |               |               | SSTH2          |                                   |                                |                            |                             |                              |                              |                       |                               |                              |                        |                               |                                 |                        |                         |                          |                      |                                  |                      |                         |                            |                               |                          |                                |                   |                          |                              |                            |                                       |                                   |                                        | 584                                   | 1987 |     |      |     |  |  |
|              |               |                |               |               |               | sem-A9         |                                   |                                |                            |                             |                              |                              |                       |                               |                              |                        |                               |                                 |                        |                         |                          |                      |                                  |                      |                         |                            |                               |                          |                                |                   |                          |                              |                            |                                       |                                   |                                        | 4                                     | 151  | 4   |      |     |  |  |
|              |               |                |               |               |               | sem-A21        |                                   |                                |                            |                             |                              |                              |                       |                               |                              |                        |                               |                                 |                        |                         |                          |                      |                                  |                      |                         |                            |                               |                          |                                |                   |                          |                              |                            |                                       |                                   |                                        | 8                                     | 39   |     |      |     |  |  |
|              |               |                |               |               |               | sem-A11        |                                   |                                |                            |                             |                              |                              |                       |                               |                              |                        |                               |                                 |                        |                         |                          |                      |                                  |                      |                         |                            |                               |                          |                                |                   |                          |                              |                            |                                       |                                   |                                        | 15                                    |      |     |      |     |  |  |
|              |               |                |               |               |               | sem-A6         |                                   |                                |                            |                             |                              |                              |                       |                               |                              |                        |                               |                                 |                        |                         |                          |                      |                                  |                      |                         |                            |                               |                          |                                |                   |                          |                              |                            |                                       |                                   |                                        | 287                                   | 123  | 41  |      |     |  |  |
|              |               |                |               |               |               | sem-A5         |                                   |                                |                            |                             |                              |                              |                       |                               |                              |                        |                               |                                 |                        |                         |                          |                      |                                  |                      |                         |                            |                               |                          |                                |                   |                          |                              |                            |                                       |                                   |                                        | 145                                   | 21   |     |      |     |  |  |
|              |               |                |               |               |               | SSTH8          |                                   |                                |                            |                             |                              |                              |                       |                               |                              |                        |                               |                                 |                        |                         |                          |                      |                                  |                      |                         |                            |                               |                          |                                |                   |                          |                              |                            |                                       |                                   |                                        | 32                                    | 427  |     |      |     |  |  |
|              |               |                |               |               |               | IKN 01         |                                   |                                |                            |                             |                              |                              |                       |                               |                              |                        |                               |                                 |                        |                         |                          |                      |                                  |                      |                         |                            |                               |                          |                                |                   |                          |                              |                            |                                       |                                   |                                        | 1                                     | 8    |     |      |     |  |  |
|              |               |                |               |               |               | SS10           |                                   |                                |                            |                             |                              |                              |                       |                               |                              |                        |                               |                                 |                        |                         |                          |                      |                                  |                      |                         |                            |                               |                          |                                |                   |                          |                              |                            |                                       |                                   |                                        | 2                                     | 24   |     |      |     |  |  |
|              |               |                |               |               |               | SS09           |                                   |                                |                            |                             |                              |                              |                       |                               |                              |                        |                               |                                 |                        |                         |                          |                      |                                  |                      |                         |                            |                               |                          |                                |                   |                          |                              |                            |                                       |                                   |                                        | 2                                     | 9    |     |      |     |  |  |
|              |               |                |               |               |               | IKN 03         |                                   |                                |                            |                             |                              |                              |                       |                               |                              |                        |                               |                                 |                        |                         |                          |                      |                                  |                      |                         |                            |                               |                          |                                |                   |                          |                              |                            |                                       |                                   |                                        |                                       | 3    |     |      |     |  |  |
|              |               |                |               |               |               | CLP 03         |                                   |                                |                            |                             |                              |                              |                       |                               |                              |                        |                               |                                 |                        |                         |                          |                      |                                  |                      |                         |                            |                               |                          |                                |                   |                          |                              |                            |                                       |                                   |                                        |                                       |      | 47  |      |     |  |  |
|              |               |                |               |               |               | GC05           |                                   |                                |                            |                             |                              |                              |                       |                               |                              |                        |                               |                                 |                        |                         |                          |                      |                                  |                      |                         |                            |                               |                          |                                |                   |                          |                              |                            |                                       |                                   |                                        |                                       | 25   |     |      |     |  |  |
|              |               |                |               |               |               | CLP 05         |                                   |                                |                            |                             |                              |                              |                       |                               |                              |                        |                               |                                 |                        |                         |                          |                      |                                  |                      |                         |                            |                               |                          |                                |                   |                          |                              |                            |                                       |                                   |                                        |                                       |      | 130 |      |     |  |  |
|              |               |                |               |               |               | CLP 06         |                                   |                                |                            |                             |                              |                              |                       |                               |                              |                        |                               |                                 |                        |                         |                          |                      |                                  |                      |                         |                            |                               |                          |                                |                   |                          |                              |                            |                                       |                                   |                                        |                                       |      | 3   |      | 1   |  |  |
|              |               |                |               |               |               | CLP 07         |                                   |                                |                            |                             |                              |                              |                       |                               |                              |                        |                               |                                 |                        |                         |                          |                      |                                  |                      |                         |                            |                               |                          |                                |                   |                          |                              |                            |                                       |                                   |                                        |                                       |      | 1   |      | 1   |  |  |
|              |               |                |               |               |               | IKN 04         |                                   |                                |                            |                             |                              |                              |                       |                               |                              |                        |                               |                                 |                        |                         |                          |                      |                                  |                      |                         |                            |                               |                          |                                |                   |                          |                              |                            |                                       |                                   |                                        |                                       | 239  |     |      | 239 |  |  |
|              |               |                |               |               |               | IKN 05         |                                   |                                |                            |                             |                              |                              |                       |                               |                              |                        |                               |                                 |                        |                         |                          |                      |                                  |                      |                         |                            |                               |                          |                                |                   |                          |                              |                            |                                       |                                   |                                        |                                       |      |     |      | 1   |  |  |
|              |               |                |               |               |               | Sim ST-14      |                                   |                                |                            |                             |                              | 1024                         |                       |                               |                              |                        |                               |                                 |                        |                         |                          |                      |                                  |                      |                         |                            |                               |                          |                                |                   |                          |                              |                            |                                       |                                   |                                        |                                       |      |     | 3585 |     |  |  |
|              |               |                |               |               |               | Sum ST-09      |                                   |                                |                            |                             |                              | 513                          | 2563                  | 513                           | 513                          | 513                    |                               |                                 |                        |                         |                          |                      |                                  |                      |                         |                            |                               |                          |                                |                   |                          |                              |                            |                                       |                                   |                                        |                                       |      |     | 513  |     |  |  |
|              |               |                |               |               |               | Sum ST-01      |                                   |                                |                            |                             |                              |                              |                       |                               |                              |                        |                               | 1536                            | 2048                   | 1024                    | 512                      | 512                  |                                  |                      |                         |                            |                               |                          |                                |                   |                          |                              |                            |                                       |                                   |                                        |                                       |      |     | 512  |     |  |  |
|              |               |                |               |               |               | Sum ST-12      |                                   |                                |                            |                             |                              |                              |                       |                               |                              |                        |                               |                                 | 64                     |                         | 64                       |                      |                                  |                      |                         |                            |                               |                          |                                |                   |                          |                              |                            |                                       |                                   |                                        |                                       |      |     |      |     |  |  |
|              |               |                |               |               |               | Sum ST-06      |                                   |                                |                            |                             |                              |                              |                       |                               |                              |                        |                               |                                 |                        |                         |                          | 512                  | 1281                             |                      |                         |                            |                               |                          |                                |                   |                          |                              |                            |                                       |                                   |                                        |                                       |      |     |      |     |  |  |
|              |               |                |               |               |               | OS1            |                                   |                                |                            |                             |                              |                              |                       |                               |                              |                        |                               | 1026                            |                        |                         | 2052                     | 1539                 |                                  | 513                  | 513                     | 513                        |                               |                          |                                |                   |                          |                              |                            |                                       |                                   |                                        |                                       |      |     |      |     |  |  |
|              |               |                |               |               |               | Sum ST-13      |                                   |                                |                            |                             |                              |                              |                       |                               |                              |                        |                               |                                 |                        | 768                     |                          |                      |                                  | 768                  |                         |                            |                               | 256                      |                                |                   |                          |                              |                            |                                       |                                   |                                        |                                       |      |     |      |     |  |  |
|              |               |                |               |               |               | Sum ST-03      |                                   |                                |                            |                             |                              |                              |                       |                               |                              |                        |                               |                                 |                        |                         |                          | 24                   |                                  |                      |                         |                            |                               |                          | 8                              |                   |                          |                              |                            |                                       |                                   |                                        |                                       |      |     |      |     |  |  |
|              |               |                |               |               |               | Sum ST-11      |                                   |                                |                            |                             |                              |                              |                       |                               |                              |                        |                               |                                 |                        |                         |                          |                      |                                  |                      |                         |                            |                               |                          |                                | 512               | 1536                     | 1024                         |                            |                                       |                                   |                                        |                                       |      |     |      |     |  |  |
|              |               |                |               |               |               | OS10           |                                   |                                |                            |                             |                              |                              |                       |                               |                              |                        |                               | 512                             |                        |                         |                          |                      |                                  |                      |                         |                            |                               |                          |                                |                   |                          |                              | 1024                       | 512                                   |                                   |                                        |                                       |      |     |      |     |  |  |
|              |               |                |               |               |               | Sim ST-02      |                                   |                                |                            |                             |                              |                              |                       |                               |                              |                        |                               | 6                               |                        |                         |                          |                      |                                  |                      |                         | 2                          |                               | 6                        |                                |                   |                          |                              |                            |                                       | 6                                 |                                        |                                       |      |     |      |     |  |  |
| Sim ST-08    |               |                |               |               |               |                |                                   |                                |                            |                             |                              |                              |                       |                               |                              |                        |                               |                                 |                        |                         |                          | 32                   |                                  |                      |                         |                            |                               |                          |                                |                   |                          |                              |                            |                                       |                                   |                                        |                                       |      |     |      |     |  |  |
| Sum ST-08    |               |                |               |               |               |                |                                   |                                |                            |                             |                              |                              |                       | 5                             |                              | 6                      |                               |                                 |                        |                         |                          |                      |                                  |                      |                         |                            |                               |                          |                                | 2                 | 7                        |                              |                            |                                       |                                   |                                        |                                       |      |     |      |     |  |  |
| OS7          |               |                |               |               |               |                |                                   |                                |                            |                             |                              | 4                            |                       |                               |                              | 4                      |                               |                                 |                        | 4                       |                          | 8                    |                                  |                      |                         |                            |                               |                          |                                |                   | 4                        | 1                            | 4                          | 8                                     | 901                               | 454                                    | 107                                   |      |     |      |     |  |  |
|              |               |                |               |               |               |                | 1537                              | 2563                           | 513                        | 513                         | 513                          | 3085                         | 2113                  | 1797                          | 2884                         | 512                    | 2085                          | 2049                            | 513                    | 519                     | 513                      | 302                  | 8                                | 512                  | 1536                    | 1024                       | 1024                          | 512                      | 6                              | 7                 | 7                        | 1                            | 1941                       | 7986                                  |                                   |                                        |                                       |      |     |      |     |  |  |

Distribution Chart of Benthic Foraminifera (Species)

| Transitional | Inner Neritic | Middle Neritic | Outer Neritic | Upper Bathyal | Lower Bathyal | Sample Code    | <i>Quinqueloculina parkeri</i> | <i>Quinqueloculina strigillata</i> | <i>Quinqueloculina philipinensis</i> | <i>Spiroloculina scrobiculata</i> | <i>Spiroloculina depressa</i> | <i>Triloculina trigonula</i> | <i>Miliolinella subrotunda</i> | <i>Edentostomina cultrata</i> | <i>Quinqueloculina tropicalis</i> | <i>Quinqueloculina bicornis</i> | <i>Triloculina tricarinata</i> | <i>Spiroloculina</i> sp. | <i>Quinqueloculina seminulum</i> | <i>Quinqueloculina pulchella</i> | <i>Quinqueloculina incisa</i> | <i>Pyrgo depressa</i> | <i>Pyrgo</i> sp. | <i>Massilina</i> sp. | <i>Pyrgo laevis</i> | <i>Pyrgo denticulata</i> | <i>Spiroloculina rotundata</i> | <i>Ammobaculites agglutinans</i> | <i>Haplophragmoides</i> sp. | <i>Textularia</i> sp. | <i>Textularia tubulosa</i> | <i>Textularia agglutinans</i> | <i>Eggerella propinqua</i> | <i>Martinotiella communis</i> |     |
|--------------|---------------|----------------|---------------|---------------|---------------|----------------|--------------------------------|------------------------------------|--------------------------------------|-----------------------------------|-------------------------------|------------------------------|--------------------------------|-------------------------------|-----------------------------------|---------------------------------|--------------------------------|--------------------------|----------------------------------|----------------------------------|-------------------------------|-----------------------|------------------|----------------------|---------------------|--------------------------|--------------------------------|----------------------------------|-----------------------------|-----------------------|----------------------------|-------------------------------|----------------------------|-------------------------------|-----|
|              |               |                |               |               |               | P. Bembang     |                                |                                    |                                      |                                   |                               |                              |                                |                               |                                   |                                 |                                |                          |                                  |                                  |                               |                       |                  |                      |                     |                          |                                |                                  |                             |                       |                            |                               |                            |                               |     |
|              |               |                |               |               |               | P. Parangireng |                                |                                    |                                      |                                   |                               |                              |                                |                               |                                   |                                 |                                |                          |                                  |                                  |                               |                       |                  |                      |                     |                          |                                |                                  |                             |                       |                            |                               |                            |                               |     |
|              |               |                |               |               |               | SSTH1          | 107                            | 107                                | 107                                  | 107                               | 107                           | 214                          |                                |                               |                                   |                                 |                                |                          |                                  |                                  |                               |                       |                  |                      |                     |                          |                                |                                  |                             |                       |                            |                               |                            |                               |     |
|              |               |                |               |               |               | SSTH2          |                                |                                    |                                      | 117                               | 58                            | 58                           | 409                            | 117                           | 117                               |                                 |                                |                          |                                  |                                  |                               |                       |                  |                      |                     |                          | 994                            | 526                              |                             |                       |                            |                               |                            |                               |     |
|              |               |                |               |               |               | sem-A9         |                                |                                    |                                      |                                   | 38                            | 11                           |                                | 4                             |                                   | 4                               |                                |                          |                                  |                                  |                               |                       |                  |                      |                     |                          |                                |                                  |                             |                       |                            |                               |                            |                               |     |
|              |               |                |               |               |               | sem-A21        |                                |                                    |                                      |                                   |                               |                              |                                |                               |                                   |                                 |                                |                          |                                  |                                  |                               |                       |                  |                      |                     |                          |                                |                                  |                             | 39                    | 15                         | 8                             |                            |                               |     |
|              |               |                |               |               |               | sem-A11        |                                |                                    |                                      |                                   |                               |                              |                                |                               |                                   |                                 |                                |                          |                                  |                                  |                               |                       |                  |                      |                     |                          | 69                             | 15                               | 5                           |                       | 5                          |                               |                            |                               |     |
|              |               |                |               |               |               | sem-A6         |                                |                                    | 41                                   |                                   |                               |                              |                                |                               |                                   |                                 | 41                             |                          |                                  |                                  |                               |                       |                  |                      |                     |                          | 41                             | 82                               |                             |                       |                            | 123                           |                            |                               |     |
|              |               |                |               |               |               | sem-A5         |                                |                                    |                                      |                                   |                               |                              |                                |                               |                                   |                                 |                                |                          |                                  |                                  |                               |                       |                  |                      |                     |                          | 41                             | 124                              |                             |                       |                            |                               |                            |                               |     |
|              |               |                |               |               |               | SSTH8          |                                |                                    | 19                                   |                                   | 58                            |                              |                                |                               | 39                                |                                 | 78                             | 19                       | 84                               |                                  |                               |                       |                  |                      |                     |                          |                                | 32                               |                             |                       | 26                         |                               |                            |                               |     |
|              |               |                |               |               |               | IKN 01         |                                |                                    |                                      |                                   | 1                             | 1                            |                                |                               |                                   |                                 | 3                              | 1                        | 1                                | 1                                |                               |                       |                  |                      |                     |                          |                                |                                  |                             |                       |                            |                               | 3                          |                               |     |
|              |               |                |               |               |               | SS10           |                                |                                    |                                      |                                   |                               |                              |                                |                               | 6                                 |                                 | 2                              | 2                        |                                  |                                  |                               |                       |                  |                      |                     |                          |                                |                                  |                             |                       |                            |                               | 1                          |                               |     |
|              |               |                |               |               |               | SS09           |                                |                                    |                                      |                                   |                               |                              |                                |                               | 15                                |                                 | 4                              |                          | 1                                |                                  |                               |                       |                  |                      |                     |                          |                                |                                  |                             |                       |                            |                               |                            |                               |     |
|              |               |                |               |               |               | IKN 03         | 1                              |                                    |                                      |                                   | 1                             | 1                            |                                |                               | 2                                 |                                 |                                | 1                        |                                  |                                  | 1                             | 1                     |                  |                      |                     |                          | 1                              |                                  |                             |                       |                            |                               | 1                          |                               |     |
|              |               |                |               |               |               | CLP 03         |                                |                                    |                                      |                                   | 10                            |                              |                                |                               | 29                                |                                 |                                |                          |                                  |                                  |                               |                       | 3                |                      |                     |                          |                                |                                  |                             |                       |                            |                               |                            | 8                             |     |
|              |               |                |               |               |               | GC05           |                                |                                    |                                      |                                   |                               |                              |                                |                               |                                   |                                 |                                |                          |                                  |                                  |                               |                       |                  |                      |                     |                          |                                |                                  |                             |                       |                            |                               |                            |                               |     |
|              |               |                |               |               |               | CLP 05         |                                |                                    |                                      |                                   | 33                            |                              |                                |                               | 22                                |                                 | 33                             |                          |                                  |                                  |                               |                       |                  |                      |                     |                          |                                |                                  |                             |                       |                            |                               |                            | 33                            |     |
|              |               |                |               |               |               | CLP 06         |                                |                                    |                                      |                                   | 1                             |                              |                                |                               |                                   |                                 | 3                              |                          |                                  |                                  |                               |                       |                  |                      |                     |                          |                                |                                  |                             |                       |                            |                               |                            |                               |     |
|              |               |                |               |               |               | CLP 07         |                                | 1                                  |                                      |                                   | 1                             |                              |                                |                               |                                   |                                 | 1                              |                          |                                  |                                  |                               |                       |                  |                      |                     |                          |                                |                                  |                             |                       |                            |                               |                            | 1                             |     |
|              |               |                |               |               |               | IKN 04         |                                |                                    |                                      |                                   | 239                           | 239                          |                                |                               |                                   |                                 | 239                            |                          |                                  |                                  | 239                           |                       |                  | 239                  |                     |                          |                                |                                  |                             |                       |                            |                               | 957                        |                               |     |
|              |               |                |               |               |               | IKN 05         |                                |                                    |                                      |                                   |                               |                              |                                |                               |                                   |                                 |                                |                          |                                  |                                  |                               | 1                     |                  |                      |                     |                          |                                |                                  |                             |                       |                            |                               |                            | 1                             |     |
|              |               |                |               |               |               | Sim ST-14      |                                |                                    |                                      |                                   |                               |                              |                                |                               | 1024                              |                                 | 1024                           | 512                      |                                  |                                  |                               |                       | 512              |                      | 512                 | 512                      |                                | 1537                             |                             |                       | 512                        |                               |                            |                               |     |
|              |               |                |               |               |               | Sum ST-09      |                                |                                    |                                      |                                   |                               |                              |                                |                               | 1025                              |                                 |                                |                          |                                  |                                  |                               |                       |                  |                      |                     |                          |                                |                                  |                             |                       | 513                        |                               | 513                        |                               |     |
|              |               |                |               |               |               | Sum ST-01      |                                |                                    |                                      |                                   | 512                           | 1536                         |                                |                               |                                   |                                 |                                |                          |                                  | 1536                             | 512                           | 1024                  |                  |                      |                     |                          | 512                            |                                  |                             |                       |                            |                               |                            |                               |     |
|              |               |                |               |               |               | Sum ST-12      |                                |                                    |                                      |                                   |                               |                              |                                |                               |                                   |                                 |                                |                          |                                  |                                  |                               |                       |                  |                      |                     |                          |                                |                                  |                             |                       |                            |                               |                            |                               |     |
|              |               |                |               |               |               | Sum ST-06      |                                |                                    |                                      |                                   |                               |                              |                                |                               |                                   |                                 |                                |                          |                                  |                                  |                               | 256                   |                  |                      |                     |                          |                                |                                  |                             |                       | 256                        |                               | 256                        |                               |     |
|              |               |                |               |               |               | OS1            |                                |                                    |                                      |                                   |                               |                              |                                |                               |                                   |                                 |                                |                          |                                  |                                  |                               |                       |                  |                      |                     |                          | 1026                           |                                  |                             |                       |                            |                               |                            |                               | 513 |
|              |               |                |               |               |               | Sum ST-13      |                                |                                    |                                      |                                   |                               |                              |                                |                               |                                   |                                 |                                |                          |                                  |                                  |                               | 256                   |                  |                      |                     |                          | 512                            |                                  |                             |                       |                            |                               |                            |                               |     |
|              |               |                |               |               |               | Sum ST-03      |                                |                                    |                                      |                                   |                               |                              |                                |                               |                                   |                                 |                                |                          |                                  |                                  |                               |                       |                  |                      |                     |                          |                                |                                  |                             |                       |                            |                               |                            |                               | 8   |
|              |               |                |               |               |               | Sum ST-11      |                                |                                    |                                      |                                   |                               |                              |                                |                               |                                   |                                 | 512                            |                          |                                  |                                  |                               |                       |                  |                      |                     |                          |                                |                                  |                             |                       |                            |                               |                            |                               | 512 |
|              |               |                |               |               |               | OS10           |                                |                                    |                                      |                                   |                               |                              |                                |                               |                                   |                                 |                                |                          |                                  |                                  |                               |                       |                  |                      |                     |                          |                                |                                  |                             |                       |                            |                               |                            |                               |     |
|              |               |                |               |               |               | Sim ST-02      |                                |                                    |                                      |                                   |                               |                              |                                |                               |                                   |                                 |                                |                          |                                  |                                  |                               |                       |                  |                      |                     |                          |                                |                                  |                             |                       |                            |                               |                            |                               |     |
|              |               |                |               |               |               | Sim ST-08      |                                |                                    |                                      |                                   |                               |                              |                                |                               |                                   |                                 |                                |                          |                                  |                                  |                               |                       | 16               |                      |                     |                          |                                |                                  |                             |                       |                            |                               |                            |                               |     |
|              |               |                |               |               |               | Sum ST-08      |                                |                                    |                                      |                                   |                               |                              |                                |                               |                                   |                                 |                                |                          |                                  |                                  |                               | 1                     |                  |                      |                     |                          |                                |                                  |                             |                       |                            |                               |                            |                               |     |
|              |               |                |               |               |               | OS7            |                                |                                    |                                      |                                   |                               |                              |                                |                               |                                   |                                 |                                |                          |                                  |                                  |                               |                       | 4                |                      |                     |                          |                                |                                  |                             |                       |                            |                               |                            |                               |     |
|              |               |                |               |               |               |                | 108                            | 108                                | 167                                  | 224                               | 1060                          | 2060                         | 409                            | 121                           | 2279                              | 4                               | 1426                           | 1047                     | 86                               | 1                                | 1777                          | 514                   | 2072             | 239                  | 512                 | 512                      | 1538                           | 3227                             | 747                         | 1324                  | 42                         | 1908                          | 513                        | 520                           |     |

## IndVal Calculation

$N_{ij}$ =average number of individuals of species/genus  $i$  in all samples in environment  $j$

$N_i$ = total average number of individuals of species/genus  $I$  in the whole environment

$M_{ij}$ = number of samples in environment  $j$  containing genus  $i$  species

$M_i$ = total sampel on environment  $j$

1 *Amphistegina sp.*

| Environment           | $N_{ij}$ | $N_i$ | $A_{ij}$ | $M_{ij}$ | $M_i$ | $B_{ij}$ | $IV_{ij}$ |
|-----------------------|----------|-------|----------|----------|-------|----------|-----------|
| Transitional          | 596      | 598   | 0.998040 | 2        | 2     | 1.000000 | 99.803996 |
| Inner Neritic (Fine S | 0        | 598   | 0.000000 | 0        | 1     | 0.000000 | 0.000000  |
| Inner Neritic (Silt)  | 0        | 598   | 0.000000 | 0        | 6     | 0.000000 | 0.000000  |
| Middle Neritic        | 1        | 598   | 0.001960 | 2        | 6     | 0.333333 | 0.065335  |
| Outer Neritic         | 0        | 598   | 0.000000 | 0        | 5     | 0.000000 | 0.000000  |
| Upper Bathyal         | 0        | 598   | 0.000000 | 0        | 6     | 0.000000 | 0.000000  |
| Lower Bathyal         | 0        | 598   | 0.000000 | 0        | 9     | 0.000000 | 0.000000  |

598

2 *Amphistegina lessonii*

| Environment           | $N_{ij}$  | $N_i$    | $A_{ij}$ | $M_{ij}$ | $M_i$ | $B_{ij}$ | $IV_{ij}$ |
|-----------------------|-----------|----------|----------|----------|-------|----------|-----------|
| Transitional          | 103.0674  | 131.8786 | 0.781532 | 2        | 2     | 1.000000 | 78.153241 |
| Inner Neritic (Fine S | 17.809067 | 131.8786 | 0.135041 | 1        | 1     | 1.000000 | 13.504137 |
| Inner Neritic (Silt)  | 9.7408    | 131.8786 | 0.073862 | 1        | 6     | 0.166667 | 1.231031  |
| Middle Neritic        | 1.2613333 | 131.8786 | 0.009564 | 1        | 6     | 0.166667 | 0.159406  |
| Outer Neritic         | 0         | 131.8786 | 0.000000 | 0        | 5     | 0.000000 | 0.000000  |
| Upper Bathyal         | 0         | 131.8786 | 0.000000 | 0        | 6     | 0.000000 | 0.000000  |
| Lower Bathyal         | 0         | 131.8786 | 0.000000 | 0        | 9     | 0.000000 | 0.000000  |

131.8786

3 *Sphaerogypsina sp.*

| Environment           | $N_{ij}$  | $N_i$     | $A_{ij}$ | $M_{ij}$ | $M_i$ | $B_{ij}$ | $IV_{ij}$ |
|-----------------------|-----------|-----------|----------|----------|-------|----------|-----------|
| Transitional          | 8212.9248 | 8212.9248 | 1.000000 | 1        | 2     | 0.500000 | 50.000000 |
| Inner Neritic (Fine S | 0         | 8212.9248 | 0.000000 | 0        | 1     | 0.000000 | 0.000000  |
| Inner Neritic (Silt)  | 0         | 8212.9248 | 0.000000 | 0        | 6     | 0.000000 | 0.000000  |
| Middle Neritic        | 0         | 8212.9248 | 0.000000 | 0        | 6     | 0.000000 | 0.000000  |
| Outer Neritic         | 0         | 8212.9248 | 0.000000 | 0        | 5     | 0.000000 | 0.000000  |
| Upper Bathyal         | 0         | 8212.9248 | 0.000000 | 0        | 6     | 0.000000 | 0.000000  |
| Lower Bathyal         | 0         | 8212.9248 | 0.000000 | 0        | 9     | 0.000000 | 0.000000  |

8212.9248

4 *Amphistegina radiata*

| Environment           | $N_{ij}$  | $N_i$     | $A_{ij}$ | $M_{ij}$ | $M_i$ | $B_{ij}$ | $IV_{ij}$ |
|-----------------------|-----------|-----------|----------|----------|-------|----------|-----------|
| Transitional          | 1336.8016 | 1530.4126 | 0.873491 | 1        | 2     | 0.500000 | 43.674549 |
| Inner Neritic (Fine S | 0         | 1530.4126 | 0.000000 | 0        | 1     | 0.000000 | 0.000000  |
| Inner Neritic (Silt)  | 0         | 1530.4126 | 0.000000 | 0        | 6     | 0.000000 | 0.000000  |
| Middle Neritic        | 0         | 1530.4126 | 0.000000 | 0        | 6     | 0.000000 | 0.000000  |
| Outer Neritic         | 193.611   | 1530.4126 | 0.126509 | 3        | 5     | 0.600000 | 7.590541  |
| Upper Bathyal         | 0         | 1530.4126 | 0.000000 | 0        | 6     | 0.000000 | 0.000000  |
| Lower Bathyal         | 0         | 1530.4126 | 0.000000 | 0        | 9     | 0.000000 | 0.000000  |

1530.4126

5 *Amphistegina papillosa*

| Environment           | $N_{ij}$  | $N_i$      | $A_{ij}$ | $M_{ij}$ | $M_i$ | $B_{ij}$ | $IV_{ij}$ |
|-----------------------|-----------|------------|----------|----------|-------|----------|-----------|
| Transitional          | 472.2832  | 1282.94501 | 0.368124 | 1        | 2     | 0.500000 | 18.406214 |
| Inner Neritic (Fine S | 106.8544  | 1282.94501 | 0.083288 | 1        | 1     | 1.000000 | 8.328837  |
| Inner Neritic (Silt)  | 27.549867 | 1282.94501 | 0.021474 | 1        | 6     | 0.166667 | 0.357899  |
| Middle Neritic        | 5.984     | 1282.94501 | 0.004664 | 2        | 6     | 0.333333 | 0.155476  |
| Outer Neritic         | 670.10688 | 1282.94501 | 0.522319 | 2        | 5     | 0.400000 | 20.892770 |
| Upper Bathyal         | 0.1666667 | 1282.94501 | 0.000130 | 1        | 6     | 0.166667 | 0.002165  |
| Lower Bathyal         | 0         | 1282.94501 | 0.000000 | 0        | 9     | 0.000000 | 0.000000  |

1282.945

#### 6 *Operculina sp.*

| Environment           | Nij       | Ni         | Aij      | Mij | Mi | Bij      | IV ij     |
|-----------------------|-----------|------------|----------|-----|----|----------|-----------|
| Transitional          | 0         | 664.387427 | 0.000000 | 0   | 2  | 0.000000 | 0.000000  |
| Inner Neritic (Fine S | 213.7088  | 664.387427 | 0.321663 | 1   | 1  | 1.000000 | 32.166292 |
| Inner Neritic (Silt)  | 1.8896    | 664.387427 | 0.002844 | 1   | 6  | 0.166667 | 0.047402  |
| Middle Neritic        | 18.185067 | 664.387427 | 0.027371 | 3   | 6  | 0.500000 | 1.368559  |
| Outer Neritic         | 430.47936 | 664.387427 | 0.647934 | 1   | 5  | 0.200000 | 12.958685 |
| Upper Bathyal         | 0.1246    | 664.387427 | 0.000188 | 1   | 6  | 0.166667 | 0.003126  |
| Lower Bathyal         | 0         | 664.387427 | 0.000000 | 0   | 9  | 0.000000 | 0.000000  |

664.38743

#### 7 *Operculina philippinensis*

| Environment           | Nij      | Ni       | Aij      | Mij | Mi | Bij      | IV ij     |
|-----------------------|----------|----------|----------|-----|----|----------|-----------|
| Transitional          | 0        | 249.2608 | 0.000000 | 0   | 2  | 0.000000 | 0.000000  |
| Inner Neritic (Fine S | 213.7088 | 249.2608 | 0.857370 | 1   | 1  | 1.000000 | 85.737027 |
| Inner Neritic (Silt)  | 0        | 249.2608 | 0.000000 | 0   | 6  | 0.000000 | 0.000000  |
| Middle Neritic        | 35.552   | 249.2608 | 0.142630 | 1   | 6  | 0.166667 | 2.377162  |
| Outer Neritic         | 0        | 249.2608 | 0.000000 | 0   | 5  | 0.000000 | 0.000000  |
| Upper Bathyal         | 0        | 249.2608 | 0.000000 | 0   | 6  | 0.000000 | 0.000000  |
| Lower Bathyal         | 0        | 249.2608 | 0.000000 | 0   | 9  | 0.000000 | 0.000000  |

249.2608

#### 8 *Operculina ammonoides*

| Environment           | Nij       | Ni         | Aij      | Mij | Mi | Bij      | IV ij     |
|-----------------------|-----------|------------|----------|-----|----|----------|-----------|
| Transitional          | 0         | 798.638813 | 0.000000 | 0   | 2  | 0.000000 | 0.000000  |
| Inner Neritic (Fine S | 106.8544  | 798.638813 | 0.133796 | 1   | 1  | 1.000000 | 13.379565 |
| Inner Neritic (Silt)  | 9.7408    | 798.638813 | 0.012197 | 1   | 6  | 0.166667 | 0.203279  |
| Middle Neritic        | 12.082333 | 798.638813 | 0.015129 | 3   | 6  | 0.500000 | 0.756433  |
| Outer Neritic         | 669.96128 | 798.638813 | 0.838879 | 3   | 5  | 0.600000 | 50.332736 |
| Upper Bathyal         | 0         | 798.638813 | 0.000000 | 0   | 6  | 0.000000 | 0.000000  |
| Lower Bathyal         | 0         | 798.638813 | 0.000000 | 0   | 9  | 0.000000 | 0.000000  |

798.63881

#### 9 *Operculina subgranulosa*

| Environment           | Nij    | Ni     | Aij      | Mij | Mi | Bij      | IV ij     |
|-----------------------|--------|--------|----------|-----|----|----------|-----------|
| Transitional          | 0      | 10.245 | 0.000000 | 0   | 2  | 0.000000 | 0.000000  |
| Inner Neritic (Fine S | 0      | 10.245 | 0.000000 | 0   | 1  | 0.000000 | 0.000000  |
| Inner Neritic (Silt)  | 9.7408 | 10.245 | 0.950786 | 1   | 6  | 0.166667 | 15.846429 |
| Middle Neritic        | 0.344  | 10.245 | 0.033577 | 1   | 6  | 0.166667 | 0.559623  |
| Outer Neritic         | 0      | 10.245 | 0.000000 | 0   | 5  | 0.000000 | 0.000000  |
| Upper Bathyal         | 0.1602 | 10.245 | 0.015637 | 1   | 6  | 0.166667 | 0.260615  |
| Lower Bathyal         | 0      | 10.245 | 0.000000 | 0   | 9  | 0.000000 | 0.000000  |

10.245

#### 10 *Operculina complanata*

| Environment           | Nij       | Ni         | Aij      | Mij | Mi | Bij      | IV ij     |
|-----------------------|-----------|------------|----------|-----|----|----------|-----------|
| Transitional          | 0         | 1.26133333 | 0.000000 | 0   | 2  | 0.000000 | 0.000000  |
| Inner Neritic (Fine S | 0         | 1.26133333 | 0.000000 | 0   | 1  | 0.000000 | 0.000000  |
| Inner Neritic (Silt)  | 0         | 1.26133333 | 0.000000 | 0   | 6  | 0.000000 | 0.000000  |
| Middle Neritic        | 1.2613333 | 1.26133333 | 1.000000 | 1   | 6  | 0.166667 | 16.666667 |
| Outer Neritic         | 0         | 1.26133333 | 0.000000 | 0   | 5  | 0.000000 | 0.000000  |
| Upper Bathyal         | 0         | 1.26133333 | 0.000000 | 0   | 6  | 0.000000 | 0.000000  |
| Lower Bathyal         | 0         | 1.26133333 | 0.000000 | 0   | 9  | 0.000000 | 0.000000  |

1.2613333



#### 11 *Amphistegina quoyii*

| Environment           | Nij        | Ni         | Aij      | Mij | Mi | Bij      | IV ij     |
|-----------------------|------------|------------|----------|-----|----|----------|-----------|
| Transitional          | 0          | 0.57333333 | 0.000000 | 0   | 2  | 0.000000 | 0.000000  |
| Inner Neritic (Fine S | 0          | 0.57333333 | 0.000000 | 0   | 1  | 0.000000 | 0.000000  |
| Inner Neritic (Silt)  | 0          | 0.57333333 | 0.000000 | 0   | 6  | 0.000000 | 0.000000  |
| Middle Neritic        | 0.57333333 | 0.57333333 | 1.000000 | 1   | 6  | 0.166667 | 16.666667 |
| Outer Neritic         | 0          | 0.57333333 | 0.000000 | 0   | 5  | 0.000000 | 0.000000  |
| Upper Bathyal         | 0          | 0.57333333 | 0.000000 | 0   | 6  | 0.000000 | 0.000000  |
| Lower Bathyal         | 0          | 0.57333333 | 0.000000 | 0   | 9  | 0.000000 | 0.000000  |

0.5733333

#### 12 *Alveolinella quoyii*

| Environment           | Nij        | Ni         | Aij      | Mij | Mi | Bij      | IV ij     |
|-----------------------|------------|------------|----------|-----|----|----------|-----------|
| Transitional          | 0          | 0.11466667 | 0.000000 | 0   | 2  | 0.000000 | 0.000000  |
| Inner Neritic (Fine S | 0          | 0.11466667 | 0.000000 | 0   | 1  | 0.000000 | 0.000000  |
| Inner Neritic (Silt)  | 0          | 0.11466667 | 0.000000 | 0   | 6  | 0.000000 | 0.000000  |
| Middle Neritic        | 0.11466667 | 0.11466667 | 1.000000 | 1   | 6  | 0.166667 | 16.666667 |
| Outer Neritic         | 0          | 0.11466667 | 0.000000 | 0   | 5  | 0.000000 | 0.000000  |
| Upper Bathyal         | 0          | 0.11466667 | 0.000000 | 0   | 6  | 0.000000 | 0.000000  |
| Lower Bathyal         | 0          | 0.11466667 | 0.000000 | 0   | 9  | 0.000000 | 0.000000  |

0.1146667

#### 13 *Calcarina calcarinoides*

| Environment           | Nij      | Ni       | Aij      | Mij | Mi | Bij      | IV ij     |
|-----------------------|----------|----------|----------|-----|----|----------|-----------|
| Transitional          | 159.1138 | 159.1138 | 1.000000 | 1   | 2  | 0.500000 | 50.000000 |
| Inner Neritic (Fine S | 0        | 159.1138 | 0.000000 | 0   | 1  | 0.000000 | 0.000000  |
| Inner Neritic (Silt)  | 0        | 159.1138 | 0.000000 | 0   | 6  | 0.000000 | 0.000000  |
| Middle Neritic        | 0        | 159.1138 | 0.000000 | 0   | 6  | 0.000000 | 0.000000  |
| Outer Neritic         | 0        | 159.1138 | 0.000000 | 0   | 5  | 0.000000 | 0.000000  |
| Upper Bathyal         | 0        | 159.1138 | 0.000000 | 0   | 6  | 0.000000 | 0.000000  |
| Lower Bathyal         | 0        | 159.1138 | 0.000000 | 0   | 9  | 0.000000 | 0.000000  |

159.1138

#### 14 *Ammonia sp.*

| Environment           | Nij       | Ni         | Aij      | Mij | Mi | Bij      | IV ij     |
|-----------------------|-----------|------------|----------|-----|----|----------|-----------|
| Transitional          | 258       | 20400.5433 | 0.012647 | 2   | 2  | 1.000000 | 1.264672  |
| Inner Neritic (Fine S | 19874.918 | 20400.5433 | 0.974235 | 1   | 1  | 1.000000 | 97.423476 |
| Inner Neritic (Silt)  | 40.941333 | 20400.5433 | 0.002007 | 4   | 6  | 0.666667 | 0.133792  |
| Middle Neritic        | 8.0152    | 20400.5433 | 0.000393 | 2   | 6  | 0.333333 | 0.013096  |
| Outer Neritic         | 47.83104  | 20400.5433 | 0.002345 | 1   | 5  | 0.200000 | 0.046892  |
| Upper Bathyal         | 170.83733 | 20400.5433 | 0.008374 | 1   | 6  | 0.166667 | 0.139569  |
| Lower Bathyal         | 0         | 20400.5433 | 0.000000 | 0   | 9  | 0.000000 | 0.000000  |

20400.543

#### 15 *Ammonia beccarii*

| Environment           | Nij       | Ni         | Aij      | Mij | Mi | Bij      | IV ij     |
|-----------------------|-----------|------------|----------|-----|----|----------|-----------|
| Transitional          | 67.0938   | 2819.12811 | 0.023799 | 1   | 2  | 0.500000 | 1.189974  |
| Inner Neritic (Fine S | 1602.816  | 2819.12811 | 0.568550 | 1   | 1  | 1.000000 | 56.855025 |
| Inner Neritic (Silt)  | 1007.6805 | 2819.12811 | 0.357444 | 5   | 6  | 0.833333 | 29.787003 |
| Middle Neritic        | 33.604333 | 2819.12811 | 0.011920 | 2   | 6  | 0.333333 | 0.397337  |
| Outer Neritic         | 107.93344 | 2819.12811 | 0.038286 | 1   | 5  | 0.200000 | 0.765722  |
| Upper Bathyal         | 0         | 2819.12811 | 0.000000 | 0   | 6  | 0.000000 | 0.000000  |
| Lower Bathyal         | 0         | 2819.12811 | 0.000000 | 0   | 9  | 0.000000 | 0.000000  |

2819.1281

#### 16 *Asterorotalia trispinosa*

| Environment           | Nij       | Ni         | Aij      | Mij | Mi | Bij      | IV ij     |
|-----------------------|-----------|------------|----------|-----|----|----------|-----------|
| Transitional          | 4.0056    | 9174.00213 | 0.000437 | 1   | 2  | 0.500000 | 0.021831  |
| Inner Neritic (Fine S | 8896      | 9174.00213 | 0.969697 | 1   | 1  | 1.000000 | 96.969674 |
| Inner Neritic (Silt)  | 266.66133 | 9174.00213 | 0.029067 | 4   | 6  | 0.666667 | 1.937804  |
| Middle Neritic        | 7.3352    | 9174.00213 | 0.000800 | 3   | 6  | 0.500000 | 0.039978  |
| Outer Neritic         | 0         | 9174.00213 | 0.000000 | 0   | 5  | 0.000000 | 0.000000  |
| Upper Bathyal         | 0         | 9174.00213 | 0.000000 | 0   | 6  | 0.000000 | 0.000000  |
| Lower Bathyal         | 0         | 9174.00213 | 0.000000 | 0   | 9  | 0.000000 | 0.000000  |

9174.0021

#### 17 *Elphidium sp.*

| Environment           | Nij       | Ni         | Aij      | Mij | Mi | Bij      | IV ij     |
|-----------------------|-----------|------------|----------|-----|----|----------|-----------|
| Transitional          | 29.0406   | 581.137867 | 0.049972 | 1   | 2  | 0.500000 | 2.498598  |
| Inner Neritic (Fine S | 213.7088  | 581.137867 | 0.367742 | 1   | 1  | 1.000000 | 36.774200 |
| Inner Neritic (Silt)  | 337.58453 | 581.137867 | 0.580903 | 4   | 6  | 0.666667 | 38.726844 |
| Middle Neritic        | 0.8039333 | 581.137867 | 0.001383 | 4   | 6  | 0.666667 | 0.092225  |
| Outer Neritic         | 0         | 581.137867 | 0.000000 | 0   | 5  | 0.000000 | 0.000000  |
| Upper Bathyal         | 0         | 581.137867 | 0.000000 | 0   | 6  | 0.000000 | 0.000000  |
| Lower Bathyal         | 0         | 581.137867 | 0.000000 | 0   | 9  | 0.000000 | 0.000000  |

581.13787

#### 18 *Elphidium crispum*

| Environment           | Nij       | Ni        | Aij      | Mij | Mi | Bij      | IV ij     |
|-----------------------|-----------|-----------|----------|-----|----|----------|-----------|
| Transitional          | 37.0518   | 304.06588 | 0.121855 | 1   | 2  | 0.500000 | 6.092726  |
| Inner Neritic (Fine S | 106.8544  | 304.06588 | 0.351419 | 1   | 1  | 1.000000 | 35.141858 |
| Inner Neritic (Silt)  | 151.15947 | 304.06588 | 0.497127 | 3   | 6  | 0.500000 | 24.856368 |
| Middle Neritic        | 4.6533333 | 304.06588 | 0.015304 | 2   | 6  | 0.333333 | 0.510123  |
| Outer Neritic         | 4.34688   | 304.06588 | 0.014296 | 1   | 5  | 0.200000 | 0.285917  |
| Upper Bathyal         | 0         | 304.06588 | 0.000000 | 0   | 6  | 0.000000 | 0.000000  |
| Lower Bathyal         | 0         | 304.06588 | 0.000000 | 0   | 9  | 0.000000 | 0.000000  |

304.06588

#### 19 *Elphidium hispidulum*

| Environment           | Nij       | Ni        | Aij      | Mij | Mi | Bij      | IV ij     |
|-----------------------|-----------|-----------|----------|-----|----|----------|-----------|
| Transitional          | 3.0042    | 4043.3306 | 0.000743 | 1   | 2  | 0.500000 | 0.037150  |
| Inner Neritic (Fine S | 3846.7584 | 4043.3306 | 0.951384 | 1   | 1  | 1.000000 | 95.138359 |
| Inner Neritic (Silt)  | 189.02933 | 4043.3306 | 0.046751 | 4   | 6  | 0.666667 | 3.116726  |
| Middle Neritic        | 4.5386667 | 4043.3306 | 0.001123 | 2   | 6  | 0.333333 | 0.037417  |
| Outer Neritic         | 0         | 4043.3306 | 0.000000 | 0   | 5  | 0.000000 | 0.000000  |
| Upper Bathyal         | 0         | 4043.3306 | 0.000000 | 0   | 6  | 0.000000 | 0.000000  |
| Lower Bathyal         | 0         | 4043.3306 | 0.000000 | 0   | 9  | 0.000000 | 0.000000  |

4043.3306

#### 20 *Reussella simplex*

| Environment           | Nij       | Ni        | Aij      | Mij | Mi | Bij      | IV ij     |
|-----------------------|-----------|-----------|----------|-----|----|----------|-----------|
| Transitional          | 2.0028    | 500.44124 | 0.004002 | 1   | 2  | 0.500000 | 0.200103  |
| Inner Neritic (Fine S | 0         | 500.44124 | 0.000000 | 0   | 1  | 0.000000 | 0.000000  |
| Inner Neritic (Silt)  | 40.523733 | 500.44124 | 0.080976 | 3   | 6  | 0.500000 | 4.048800  |
| Middle Neritic        | 0.1423333 | 500.44124 | 0.000284 | 1   | 6  | 0.166667 | 0.004740  |
| Outer Neritic         | 286.98624 | 500.44124 | 0.573466 | 1   | 5  | 0.200000 | 11.469328 |
| Upper Bathyal         | 170.78613 | 500.44124 | 0.341271 | 2   | 6  | 0.333333 | 11.375703 |
| Lower Bathyal         | 0         | 500.44124 | 0.000000 | 0   | 9  | 0.000000 | 0.000000  |

500.44124

### 21 *Cellanthus craticulatus*

| Environment           | Nij       | Ni         | Aij      | Mij | Mi | Bij      | IV ij     |
|-----------------------|-----------|------------|----------|-----|----|----------|-----------|
| Transitional          | 33.027    | 236.620813 | 0.139578 | 2   | 2  | 1.000000 | 13.957775 |
| Inner Neritic (Fine S | 106.8544  | 236.620813 | 0.451585 | 1   | 1  | 1.000000 | 45.158496 |
| Inner Neritic (Silt)  | 0         | 236.620813 | 0.000000 | 0   | 6  | 0.000000 | 0.000000  |
| Middle Neritic        | 1.0773333 | 236.620813 | 0.004553 | 1   | 6  | 0.166667 | 0.075883  |
| Outer Neritic         | 95.66208  | 236.620813 | 0.404284 | 1   | 5  | 0.200000 | 8.085686  |
| Upper Bathyal         | 0         | 236.620813 | 0.000000 | 0   | 6  | 0.000000 | 0.000000  |
| Lower Bathyal         | 0         | 236.620813 | 0.000000 | 0   | 9  | 0.000000 | 0.000000  |

236.62081

### 22 *Peneroplis carinatus*

| Environment           | Nij      | Ni       | Aij      | Mij | Mi | Bij      | IV ij     |
|-----------------------|----------|----------|----------|-----|----|----------|-----------|
| Transitional          | 3.0042   | 333.3082 | 0.009013 | 1   | 2  | 0.500000 | 0.450664  |
| Inner Neritic (Fine S | 320.5632 | 333.3082 | 0.961762 | 1   | 1  | 1.000000 | 96.176212 |
| Inner Neritic (Silt)  | 9.7408   | 333.3082 | 0.029225 | 1   | 6  | 0.166667 | 0.487077  |
| Middle Neritic        | 0        | 333.3082 | 0.000000 | 0   | 6  | 0.000000 | 0.000000  |
| Outer Neritic         | 0        | 333.3082 | 0.000000 | 0   | 5  | 0.000000 | 0.000000  |
| Upper Bathyal         | 0        | 333.3082 | 0.000000 | 0   | 6  | 0.000000 | 0.000000  |
| Lower Bathyal         | 0        | 333.3082 | 0.000000 | 0   | 9  | 0.000000 | 0.000000  |

333.3082

### 23 *Peneroplis planatus*

| Environment           | Nij      | Ni      | Aij      | Mij | Mi | Bij      | IV ij     |
|-----------------------|----------|---------|----------|-----|----|----------|-----------|
| Transitional          | 2.0028   | 118.598 | 0.016887 | 1   | 2  | 0.500000 | 0.844365  |
| Inner Neritic (Fine S | 106.8544 | 118.598 | 0.900980 | 1   | 1  | 1.000000 | 90.097978 |
| Inner Neritic (Silt)  | 9.7408   | 118.598 | 0.082133 | 1   | 6  | 0.166667 | 1.368882  |
| Middle Neritic        | 0        | 118.598 | 0.000000 | 0   | 6  | 0.000000 | 0.000000  |
| Outer Neritic         | 0        | 118.598 | 0.000000 | 0   | 5  | 0.000000 | 0.000000  |
| Upper Bathyal         | 0        | 118.598 | 0.000000 | 0   | 6  | 0.000000 | 0.000000  |
| Lower Bathyal         | 0        | 118.598 | 0.000000 | 0   | 9  | 0.000000 | 0.000000  |

118.598

### 24 *Peneroplis pertusus*

| Environment           | Nij      | Ni       | Aij      | Mij | Mi | Bij      | IV ij     |
|-----------------------|----------|----------|----------|-----|----|----------|-----------|
| Transitional          | 2.0028   | 108.8572 | 0.018398 | 1   | 2  | 0.500000 | 0.919921  |
| Inner Neritic (Fine S | 106.8544 | 108.8572 | 0.981602 | 1   | 1  | 1.000000 | 98.160158 |
| Inner Neritic (Silt)  | 0        | 108.8572 | 0.000000 | 0   | 6  | 0.000000 | 0.000000  |
| Middle Neritic        | 0        | 108.8572 | 0.000000 | 0   | 6  | 0.000000 | 0.000000  |
| Outer Neritic         | 0        | 108.8572 | 0.000000 | 0   | 5  | 0.000000 | 0.000000  |
| Upper Bathyal         | 0        | 108.8572 | 0.000000 | 0   | 6  | 0.000000 | 0.000000  |
| Lower Bathyal         | 0        | 108.8572 | 0.000000 | 0   | 9  | 0.000000 | 0.000000  |

108.8572

### 25 *Pseudorotalia sp.*

| Environment           | Nij       | Ni         | Aij      | Mij | Mi | Bij      | IV ij     |
|-----------------------|-----------|------------|----------|-----|----|----------|-----------|
| Transitional          | 1.0014    | 1129.11821 | 0.000887 | 1   | 2  | 0.500000 | 0.044344  |
| Inner Neritic (Fine S | 641.1264  | 1129.11821 | 0.567812 | 1   | 1  | 1.000000 | 56.781159 |
| Inner Neritic (Silt)  | 87.474133 | 1129.11821 | 0.077471 | 3   | 6  | 0.500000 | 3.873560  |
| Middle Neritic        | 29.137767 | 1129.11821 | 0.025806 | 4   | 6  | 0.666667 | 1.720385  |
| Outer Neritic         | 370.21184 | 1129.11821 | 0.327877 | 3   | 5  | 0.600000 | 19.672617 |
| Upper Bathyal         | 0.1666667 | 1129.11821 | 0.000148 | 1   | 6  | 0.166667 | 0.002460  |
| Lower Bathyal         | 0         | 1129.11821 | 0.000000 | 0   | 9  | 0.000000 | 0.000000  |

1129.1182

# 26 *Ammonia tepida*

| Environment           | Nij       | Ni         | Aij      | Mij | Mi | Bij      | IV ij     |
|-----------------------|-----------|------------|----------|-----|----|----------|-----------|
| Transitional          | 0         | 4379.31689 | 0.000000 | 0   | 2  | 0.000000 | 0.000000  |
| Inner Neritic (Fine S | 1495.9616 | 4379.31689 | 0.341597 | 1   | 1  | 1.000000 | 34.159702 |
| Inner Neritic (Silt)  | 2861.84   | 4379.31689 | 0.653490 | 6   | 6  | 1.000000 | 65.349005 |
| Middle Neritic        | 12.454867 | 4379.31689 | 0.002844 | 5   | 6  | 0.833333 | 0.237002  |
| Outer Neritic         | 8.89376   | 4379.31689 | 0.002031 | 2   | 5  | 0.400000 | 0.081234  |
| Upper Bathyal         | 0.166667  | 4379.31689 | 0.000038 | 1   | 6  | 0.166667 | 0.000634  |
| Lower Bathyal         | 0         | 4379.31689 | 0.000000 | 0   | 9  | 0.000000 | 0.000000  |

4379.3169

# 27 *Elphidium neosimplex*

| Environment           | Nij       | Ni       | Aij      | Mij | Mi | Bij      | IV ij     |
|-----------------------|-----------|----------|----------|-----|----|----------|-----------|
| Transitional          | 0         | 1242.204 | 0.000000 | 0   | 2  | 0.000000 | 0.000000  |
| Inner Neritic (Fine S | 1068.544  | 1242.204 | 0.860200 | 1   | 1  | 1.000000 | 86.020010 |
| Inner Neritic (Silt)  | 79.456    | 1242.204 | 0.063964 | 4   | 6  | 0.666667 | 4.264249  |
| Middle Neritic        | 8.7853333 | 1242.204 | 0.007072 | 2   | 6  | 0.333333 | 0.235746  |
| Outer Neritic         | 0         | 1242.204 | 0.000000 | 0   | 5  | 0.000000 | 0.000000  |
| Upper Bathyal         | 85.418667 | 1242.204 | 0.068764 | 1   | 6  | 0.166667 | 1.146063  |
| Lower Bathyal         | 0         | 1242.204 | 0.000000 | 0   | 9  | 0.000000 | 0.000000  |

1242.204

# 28 *Cibicides sp.*

| Environment           | Nij       | Ni         | Aij      | Mij | Mi | Bij      | IV ij     |
|-----------------------|-----------|------------|----------|-----|----|----------|-----------|
| Transitional          | 0         | 4805.70621 | 0.000000 | 0   | 2  | 0.000000 | 0.000000  |
| Inner Neritic (Fine S | 854.8352  | 4805.70621 | 0.177879 | 1   | 1  | 1.000000 | 17.787920 |
| Inner Neritic (Silt)  | 193.1304  | 4805.70621 | 0.040188 | 4   | 6  | 0.666667 | 2.679182  |
| Middle Neritic        | 97.212833 | 4805.70621 | 0.020229 | 6   | 6  | 1.000000 | 2.022863  |
| Outer Neritic         | 1765.392  | 4805.70621 | 0.367353 | 5   | 5  | 1.000000 | 36.735329 |
| Upper Bathyal         | 1068.7087 | 4805.70621 | 0.222383 | 5   | 6  | 0.833333 | 18.531939 |
| Lower Bathyal         | 826.42711 | 4805.70621 | 0.171968 | 6   | 9  | 0.666667 | 11.464525 |

4805.7062

# 29 *Ammonia gaimardii*

| Environment           | Nij       | Ni         | Aij      | Mij | Mi | Bij      | IV ij     |
|-----------------------|-----------|------------|----------|-----|----|----------|-----------|
| Transitional          | 0         | 675.742413 | 0.000000 | 0   | 2  | 0.000000 | 0.000000  |
| Inner Neritic (Fine S | 641.1264  | 675.742413 | 0.948773 | 1   | 1  | 1.000000 | 94.877336 |
| Inner Neritic (Silt)  | 0         | 675.742413 | 0.000000 | 0   | 6  | 0.000000 | 0.000000  |
| Middle Neritic        | 3.8611333 | 675.742413 | 0.005714 | 3   | 6  | 0.500000 | 0.285696  |
| Outer Neritic         | 30.75488  | 675.742413 | 0.045513 | 3   | 5  | 0.600000 | 2.730764  |
| Upper Bathyal         | 0         | 675.742413 | 0.000000 | 0   | 6  | 0.000000 | 0.000000  |
| Lower Bathyal         | 0         | 675.742413 | 0.000000 | 0   | 9  | 0.000000 | 0.000000  |

675.74241

# 30 *Adelosina laevigata*

| Environment           | Nij      | Ni       | Aij      | Mij | Mi | Bij      | IV ij     |
|-----------------------|----------|----------|----------|-----|----|----------|-----------|
| Transitional          | 0        | 216.0144 | 0.000000 | 0   | 2  | 0.000000 | 0.000000  |
| Inner Neritic (Fine S | 213.7088 | 216.0144 | 0.989327 | 1   | 1  | 1.000000 | 98.932664 |
| Inner Neritic (Silt)  | 0        | 216.0144 | 0.000000 | 0   | 6  | 0.000000 | 0.000000  |
| Middle Neritic        | 2.3056   | 216.0144 | 0.010673 | 2   | 6  | 0.333333 | 0.355779  |
| Outer Neritic         | 0        | 216.0144 | 0.000000 | 0   | 5  | 0.000000 | 0.000000  |
| Upper Bathyal         | 0        | 216.0144 | 0.000000 | 0   | 6  | 0.000000 | 0.000000  |
| Lower Bathyal         | 0        | 216.0144 | 0.000000 | 0   | 9  | 0.000000 | 0.000000  |

216.0144

31 *Baggina indica*

| Environment           | Nij       | Ni       | Aij      | Mij | Mi | Bij      | IV ij     |
|-----------------------|-----------|----------|----------|-----|----|----------|-----------|
| Transitional          | 0         | 235.1904 | 0.000000 | 0   | 2  | 0.000000 | 0.000000  |
| Inner Neritic (Fine S | 106.8544  | 235.1904 | 0.454331 | 1   | 1  | 1.000000 | 45.433147 |
| Inner Neritic (Silt)  | 0         | 235.1904 | 0.000000 | 0   | 6  | 0.000000 | 0.000000  |
| Middle Neritic        | 0.3018667 | 235.1904 | 0.001283 | 1   | 6  | 0.166667 | 0.021392  |
| Outer Neritic         | 0         | 235.1904 | 0.000000 | 0   | 5  | 0.000000 | 0.000000  |
| Upper Bathyal         | 128.03413 | 235.1904 | 0.544385 | 2   | 6  | 0.333333 | 18.146168 |
| Lower Bathyal         | 0         | 235.1904 | 0.000000 | 0   | 9  | 0.000000 | 0.000000  |

235.1904

32 *Brizalina sp.*

| Environment           | Nij       | Ni         | Aij      | Mij | Mi | Bij      | IV ij     |
|-----------------------|-----------|------------|----------|-----|----|----------|-----------|
| Transitional          | 0         | 999.302778 | 0.000000 | 0   | 2  | 0.000000 | 0.000000  |
| Inner Neritic (Fine S | 0         | 999.302778 | 0.000000 | 0   | 1  | 0.000000 | 0.000000  |
| Inner Neritic (Silt)  | 84.8848   | 999.302778 | 0.084944 | 5   | 6  | 0.833333 | 7.078669  |
| Middle Neritic        | 2.9282667 | 999.302778 | 0.002930 | 5   | 6  | 0.833333 | 0.244192  |
| Outer Neritic         | 0.2       | 999.302778 | 0.000200 | 1   | 5  | 0.200000 | 0.004003  |
| Upper Bathyal         | 598.01967 | 999.302778 | 0.598437 | 2   | 6  | 0.333333 | 19.947897 |
| Lower Bathyal         | 313.27004 | 999.302778 | 0.313489 | 4   | 9  | 0.444444 | 13.932827 |

999.30278

33 *Anomalina globulosus*

| Environment           | Nij       | Ni        | Aij      | Mij | Mi | Bij      | IV ij     |
|-----------------------|-----------|-----------|----------|-----|----|----------|-----------|
| Transitional          | 0         | 157.34628 | 0.000000 | 0   | 2  | 0.000000 | 0.000000  |
| Inner Neritic (Fine S | 0         | 157.34628 | 0.000000 | 0   | 1  | 0.000000 | 0.000000  |
| Inner Neritic (Silt)  | 69.0096   | 157.34628 | 0.438584 | 2   | 6  | 0.333333 | 14.619475 |
| Middle Neritic        | 0.4079333 | 157.34628 | 0.002593 | 3   | 6  | 0.500000 | 0.129629  |
| Outer Neritic         | 2.51008   | 157.34628 | 0.015953 | 1   | 5  | 0.200000 | 0.319052  |
| Upper Bathyal         | 85.418667 | 157.34628 | 0.542871 | 1   | 6  | 0.166667 | 9.047843  |
| Lower Bathyal         | 0         | 157.34628 | 0.000000 | 0   | 9  | 0.000000 | 0.000000  |

157.34628

34 *Fissurina ampullacea*

| Environment           | Nij       | Ni         | Aij      | Mij | Mi | Bij      | IV ij     |
|-----------------------|-----------|------------|----------|-----|----|----------|-----------|
| Transitional          | 0         | 138.909856 | 0.000000 | 0   | 2  | 0.000000 | 0.000000  |
| Inner Neritic (Fine S | 0         | 138.909856 | 0.000000 | 0   | 1  | 0.000000 | 0.000000  |
| Inner Neritic (Silt)  | 49.3152   | 138.909856 | 0.355016 | 2   | 6  | 0.333333 | 11.833862 |
| Middle Neritic        | 3.8775    | 138.909856 | 0.027914 | 3   | 6  | 0.500000 | 1.395689  |
| Outer Neritic         | 0         | 138.909856 | 0.000000 | 0   | 5  | 0.000000 | 0.000000  |
| Upper Bathyal         | 85.585333 | 138.909856 | 0.616121 | 2   | 6  | 0.333333 | 20.537380 |
| Lower Bathyal         | 0.1318222 | 138.909856 | 0.000949 | 1   | 9  | 0.111111 | 0.010544  |

138.90986

35 *Oolina globosa*

| Environment           | Nij       | Ni         | Aij      | Mij | Mi | Bij      | IV ij     |
|-----------------------|-----------|------------|----------|-----|----|----------|-----------|
| Transitional          | 0         | 335.775378 | 0.000000 | 0   | 2  | 0.000000 | 0.000000  |
| Inner Neritic (Fine S | 0         | 335.775378 | 0.000000 | 0   | 1  | 0.000000 | 0.000000  |
| Inner Neritic (Silt)  | 20.024533 | 335.775378 | 0.059637 | 3   | 6  | 0.500000 | 2.981835  |
| Middle Neritic        | 1.244     | 335.775378 | 0.003705 | 2   | 6  | 0.333333 | 0.123495  |
| Outer Neritic         | 0         | 335.775378 | 0.000000 | 0   | 5  | 0.000000 | 0.000000  |
| Upper Bathyal         | 309.504   | 335.775378 | 0.921759 | 4   | 6  | 0.666667 | 61.450605 |
| Lower Bathyal         | 5.0028444 | 335.775378 | 0.014899 | 2   | 9  | 0.222222 | 0.331097  |

335.77538

### 36 *Bulimina marginata*

| Environment           | Nij       | Ni         | Aij      | Mij | Mi | Bij      | IV ij     |
|-----------------------|-----------|------------|----------|-----|----|----------|-----------|
| Transitional          | 0         | 2091.93562 | 0.000000 | 0   | 2  | 0.000000 | 0.000000  |
| Inner Neritic (Fine S | 0         | 2091.93562 | 0.000000 | 0   | 1  | 0.000000 | 0.000000  |
| Inner Neritic (Silt)  | 76.802133 | 2091.93562 | 0.036713 | 5   | 6  | 0.833333 | 3.059453  |
| Middle Neritic        | 1.8533333 | 2091.93562 | 0.000886 | 2   | 6  | 0.333333 | 0.029531  |
| Outer Neritic         | 16.67604  | 2091.93562 | 0.007972 | 3   | 5  | 0.600000 | 0.478295  |
| Upper Bathyal         | 1600.9594 | 2091.93562 | 0.765301 | 5   | 6  | 0.833333 | 63.775043 |
| Lower Bathyal         | 395.64471 | 2091.93562 | 0.189129 | 7   | 9  | 0.777778 | 14.709997 |

2091.9356

### 37 *Florilus boueanum*

| Environment           | Nij       | Ni       | Aij      | Mij | Mi | Bij      | IV ij     |
|-----------------------|-----------|----------|----------|-----|----|----------|-----------|
| Transitional          | 0         | 373.8032 | 0.000000 | 0   | 2  | 0.000000 | 0.000000  |
| Inner Neritic (Fine S | 0         | 373.8032 | 0.000000 | 0   | 1  | 0.000000 | 0.000000  |
| Inner Neritic (Silt)  | 369.49387 | 373.8032 | 0.988472 | 4   | 6  | 0.666667 | 65.898110 |
| Middle Neritic        | 4.3093333 | 373.8032 | 0.011528 | 1   | 6  | 0.166667 | 0.192139  |
| Outer Neritic         | 0         | 373.8032 | 0.000000 | 0   | 5  | 0.000000 | 0.000000  |
| Upper Bathyal         | 0         | 373.8032 | 0.000000 | 0   | 6  | 0.000000 | 0.000000  |
| Lower Bathyal         | 0         | 373.8032 | 0.000000 | 0   | 9  | 0.000000 | 0.000000  |

373.8032

### 38 *Bulimina gibba*

| Environment           | Nij       | Ni         | Aij      | Mij | Mi | Bij      | IV ij     |
|-----------------------|-----------|------------|----------|-----|----|----------|-----------|
| Transitional          | 0         | 9.87262222 | 0.000000 | 0   | 2  | 0.000000 | 0.000000  |
| Inner Neritic (Fine S | 0         | 9.87262222 | 0.000000 | 0   | 1  | 0.000000 | 0.000000  |
| Inner Neritic (Silt)  | 9.7408    | 9.87262222 | 0.986648 | 1   | 6  | 0.166667 | 16.444128 |
| Middle Neritic        | 0         | 9.87262222 | 0.000000 | 0   | 6  | 0.000000 | 0.000000  |
| Outer Neritic         | 0         | 9.87262222 | 0.000000 | 0   | 5  | 0.000000 | 0.000000  |
| Upper Bathyal         | 0         | 9.87262222 | 0.000000 | 0   | 6  | 0.000000 | 0.000000  |
| Lower Bathyal         | 0.1318222 | 9.87262222 | 0.013352 | 1   | 9  | 0.111111 | 0.148359  |

9.8726222

### 39 *Brizalina aenariensis*

| Environment           | Nij       | Ni       | Aij      | Mij | Mi | Bij      | IV ij     |
|-----------------------|-----------|----------|----------|-----|----|----------|-----------|
| Transitional          | 0         | 7178.838 | 0.000000 | 0   | 2  | 0.000000 | 0.000000  |
| Inner Neritic (Fine S | 0         | 7178.838 | 0.000000 | 0   | 1  | 0.000000 | 0.000000  |
| Inner Neritic (Silt)  | 115.6664  | 7178.838 | 0.016112 | 4   | 6  | 0.666667 | 1.074142  |
| Middle Neritic        | 18.704933 | 7178.838 | 0.002606 | 6   | 6  | 1.000000 | 0.260557  |
| Outer Neritic         | 5080.8    | 7178.838 | 0.707747 | 5   | 5  | 1.000000 | 70.774685 |
| Upper Bathyal         | 1963.6667 | 7178.838 | 0.273535 | 2   | 6  | 0.333333 | 9.117848  |
| Lower Bathyal         | 0         | 7178.838 | 0.000000 | 0   | 9  | 0.000000 | 0.000000  |

7178.838

### 40 *Nodosaria sp.*

| Environment           | Nij       | Ni         | Aij      | Mij | Mi | Bij      | IV ij     |
|-----------------------|-----------|------------|----------|-----|----|----------|-----------|
| Transitional          | 0         | 232.173671 | 0.000000 | 0   | 2  | 0.000000 | 0.000000  |
| Inner Neritic (Fine S | 0         | 232.173671 | 0.000000 | 0   | 1  | 0.000000 | 0.000000  |
| Inner Neritic (Silt)  | 3.1778667 | 232.173671 | 0.013687 | 2   | 6  | 0.333333 | 0.456248  |
| Middle Neritic        | 1.0986667 | 232.173671 | 0.004732 | 2   | 6  | 0.333333 | 0.157736  |
| Outer Neritic         | 13.36736  | 232.173671 | 0.057575 | 3   | 5  | 0.600000 | 3.454490  |
| Upper Bathyal         | 213.41867 | 232.173671 | 0.919220 | 2   | 6  | 0.333333 | 30.640664 |
| Lower Bathyal         | 1.1111111 | 232.173671 | 0.004786 | 1   | 9  | 0.111111 | 0.053174  |

232.17367

41 *Hyalinea bhaltica*

| Environment            | Nij       | Ni         | Aij      | Mij | Mi | Bij      | IV ij     |
|------------------------|-----------|------------|----------|-----|----|----------|-----------|
| Transitional           | 0         | 805.717333 | 0.000000 | 0   | 2  | 0.000000 | 0.000000  |
| Inner Neritic (Fine S) | 0         | 805.717333 | 0.000000 | 0   | 1  | 0.000000 | 0.000000  |
| Inner Neritic (Silt)   | 1.2597333 | 805.717333 | 0.001563 | 1   | 6  | 0.166667 | 0.026058  |
| Middle Neritic         | 0.5493333 | 805.717333 | 0.000682 | 2   | 6  | 0.333333 | 0.022726  |
| Outer Neritic          | 0         | 805.717333 | 0.000000 | 0   | 5  | 0.000000 | 0.000000  |
| Upper Bathyal          | 747.008   | 805.717333 | 0.927134 | 3   | 6  | 0.500000 | 46.356704 |
| Lower Bathyal          | 56.900267 | 805.717333 | 0.070621 | 1   | 9  | 0.111111 | 0.784674  |
|                        | 805.71733 |            |          |     |    |          |           |

42 *Siphonina bradyi*[illegible]

43 *Cassidulina* sp.

| Environment            | Nij       | Ni         | Aij      | Mij | Mi | Bij      | IV ij     |
|------------------------|-----------|------------|----------|-----|----|----------|-----------|
| Transitional           | 0         | 443.140373 | 0.000000 | 0   | 2  | 0.000000 | 0.000000  |
| Inner Neritic (Fine S) | 0         | 443.140373 | 0.000000 | 0   | 1  | 0.000000 | 0.000000  |
| Inner Neritic (Silt)   | 1.2597333 | 443.140373 | 0.002843 | 1   | 6  | 0.166667 | 0.047379  |
| Middle Neritic         | 0.1146667 | 443.140373 | 0.000259 | 1   | 6  | 0.166667 | 0.004313  |
| Outer Neritic          | 14.72384  | 443.140373 | 0.033226 | 2   | 5  | 0.400000 | 1.329045  |
| Upper Bathyal          | 427.04213 | 443.140373 | 0.963672 | 2   | 6  | 0.333333 | 32.122412 |
| Lower Bathyal          | 0         | 443.140373 | 0.000000 | 0   | 9  | 0.000000 | 0.000000  |

44 *Anomalina colligera*

| Environment            | Nij       | Ni         | Aij      | Mij | Mi | Bij      | IV ij     |
|------------------------|-----------|------------|----------|-----|----|----------|-----------|
| Transitional           | 0         | 937.799929 | 0.000000 | 0   | 2  | 0.000000 | 0.000000  |
| Inner Neritic (Fine S) | 0         | 937.799929 | 0.000000 | 0   | 1  | 0.000000 | 0.000000  |
| Inner Neritic (Silt)   | 0.6298667 | 937.799929 | 0.000672 | 1   | 6  | 0.166667 | 0.011194  |
| Middle Neritic         | 0.6013333 | 937.799929 | 0.000641 | 2   | 6  | 0.333333 | 0.021374  |
| Outer Neritic          | 2.17344   | 937.799929 | 0.002318 | 1   | 5  | 0.200000 | 0.046352  |
| Upper Bathyal          | 362.78613 | 937.799929 | 0.386848 | 3   | 6  | 0.500000 | 19.342406 |
| Lower Bathyal          | 571.60916 | 937.799929 | 0.609521 | 6   | 9  | 0.666667 | 40.634762 |

45 *Nodosaria lepidula*

| Environment            | Nij    | Ni    | Aij      | Mij | Mi | Bij      | IV ij     |
|------------------------|--------|-------|----------|-----|----|----------|-----------|
| Transitional           | 0      | 13.21 | 0.000000 | 0   | 2  | 0.000000 | 0.000000  |
| Inner Neritic (Fine S) | 0      | 13.21 | 0.000000 | 0   | 1  | 0.000000 | 0.000000  |
| Inner Neritic (Silt)   | 7.2368 | 13.21 | 0.547827 | 3   | 6  | 0.500000 | 27.391370 |
| Middle Neritic         | 5.9732 | 13.21 | 0.452173 | 3   | 6  | 0.500000 | 22.608630 |
| Outer Neritic          | 0      | 13.21 | 0.000000 | 0   | 5  | 0.000000 | 0.000000  |
| Upper Bathyal          | 0      | 13.21 | 0.000000 | 0   | 6  | 0.000000 | 0.000000  |
| Lower Bathyal          | 0      | 13.21 | 0.000000 | 0   | 9  | 0.000000 | 0.000000  |

46 *Oridorsalis tenera*

| Environment           | Nij       | Ni         | Aij      | Mij | Mi | Bij      | IV ij     |
|-----------------------|-----------|------------|----------|-----|----|----------|-----------|
| Transitional          | 0         | 1.25973333 | 0.000000 | 0   | 2  | 0.000000 | 0.000000  |
| Inner Neritic (Fine S | 0         | 1.25973333 | 0.000000 | 0   | 1  | 0.000000 | 0.000000  |
| Inner Neritic (Silt)  | 1.2597333 | 1.25973333 | 1.000000 | 1   | 6  | 0.166667 | 16.666667 |
| Middle Neritic        | 0         | 1.25973333 | 0.000000 | 0   | 6  | 0.000000 | 0.000000  |
| Outer Neritic         | 0         | 1.25973333 | 0.000000 | 0   | 5  | 0.000000 | 0.000000  |
| Upper Bathyal         | 0         | 1.25973333 | 0.000000 | 0   | 6  | 0.000000 | 0.000000  |
| Lower Bathyal         | 0         | 1.25973333 | 0.000000 | 0   | 9  | 0.000000 | 0.000000  |

1.2597333

47 *Sphaeroidina bulloides*

| Environment           | Nij       | Ni         | Aij      | Mij | Mi | Bij      | IV ij     |
|-----------------------|-----------|------------|----------|-----|----|----------|-----------|
| Transitional          | 0         | 229.863733 | 0.000000 | 0   | 2  | 0.000000 | 0.000000  |
| Inner Neritic (Fine S | 0         | 229.863733 | 0.000000 | 0   | 1  | 0.000000 | 0.000000  |
| Inner Neritic (Silt)  | 0.6298667 | 229.863733 | 0.002740 | 1   | 6  | 0.166667 | 0.045670  |
| Middle Neritic        | 1.036     | 229.863733 | 0.004507 | 2   | 6  | 0.333333 | 0.150234  |
| Outer Neritic         | 0         | 229.863733 | 0.000000 | 0   | 5  | 0.000000 | 0.000000  |
| Upper Bathyal         | 170.73493 | 229.863733 | 0.742766 | 1   | 6  | 0.166667 | 12.379431 |
| Lower Bathyal         | 57.462933 | 229.863733 | 0.249987 | 2   | 9  | 0.222222 | 5.555266  |

229.86373

48 *Brizalina robusta*

| Environment           | Nij       | Ni         | Aij      | Mij | Mi | Bij      | IV ij     |
|-----------------------|-----------|------------|----------|-----|----|----------|-----------|
| Transitional          | 0         | 2685.91543 | 0.000000 | 0   | 2  | 0.000000 | 0.000000  |
| Inner Neritic (Fine S | 0         | 2685.91543 | 0.000000 | 0   | 1  | 0.000000 | 0.000000  |
| Inner Neritic (Silt)  | 197.0336  | 2685.91543 | 0.073358 | 4   | 6  | 0.666667 | 4.890539  |
| Middle Neritic        | 5.7361667 | 2685.91543 | 0.002136 | 4   | 6  | 0.666667 | 0.142376  |
| Outer Neritic         | 672.36824 | 2685.91543 | 0.250331 | 4   | 5  | 0.800000 | 20.026490 |
| Upper Bathyal         | 1493.9568 | 2685.91543 | 0.556219 | 4   | 6  | 0.666667 | 37.081257 |
| Lower Bathyal         | 316.82062 | 2685.91543 | 0.117956 | 4   | 9  | 0.444444 | 5.242502  |

2685.9154

49 *Fissurina sp.*

| Environment           | Nij       | Ni         | Aij      | Mij | Mi | Bij      | IV ij     |
|-----------------------|-----------|------------|----------|-----|----|----------|-----------|
| Transitional          | 0         | 1.01902222 | 0.000000 | 0   | 2  | 0.000000 | 0.000000  |
| Inner Neritic (Fine S | 0         | 1.01902222 | 0.000000 | 0   | 1  | 0.000000 | 0.000000  |
| Inner Neritic (Silt)  | 0.6298667 | 1.01902222 | 0.618109 | 1   | 6  | 0.166667 | 10.301814 |
| Middle Neritic        | 0.1666667 | 1.01902222 | 0.163555 | 1   | 6  | 0.166667 | 2.725925  |
| Outer Neritic         | 0         | 1.01902222 | 0.000000 | 0   | 5  | 0.000000 | 0.000000  |
| Upper Bathyal         | 0         | 1.01902222 | 0.000000 | 0   | 6  | 0.000000 | 0.000000  |
| Lower Bathyal         | 0.2224889 | 1.01902222 | 0.218336 | 1   | 9  | 0.111111 | 2.425952  |

1.0190222

50 *Bolivinita quadrilatera*

| Environment           | Nij       | Ni         | Aij      | Mij | Mi | Bij      | IV ij     |
|-----------------------|-----------|------------|----------|-----|----|----------|-----------|
| Transitional          | 0         | 1089.47182 | 0.000000 | 0   | 2  | 0.000000 | 0.000000  |
| Inner Neritic (Fine S | 0         | 1089.47182 | 0.000000 | 0   | 1  | 0.000000 | 0.000000  |
| Inner Neritic (Silt)  | 0.6298667 | 1089.47182 | 0.000578 | 1   | 6  | 0.166667 | 0.009636  |
| Middle Neritic        | 0         | 1089.47182 | 0.000000 | 0   | 6  | 0.000000 | 0.000000  |
| Outer Neritic         | 0         | 1089.47182 | 0.000000 | 0   | 5  | 0.000000 | 0.000000  |
| Upper Bathyal         | 661.6064  | 1089.47182 | 0.607273 | 4   | 6  | 0.666667 | 40.484841 |
| Lower Bathyal         | 427.23556 | 1089.47182 | 0.392149 | 2   | 9  | 0.222222 | 8.714428  |

1089.4718



#### 51 *Siphogenerina striata*

| Environment           | Nij       | Ni         | Aij      | Mij | Mi | Bij      | IV ij     |
|-----------------------|-----------|------------|----------|-----|----|----------|-----------|
| Transitional          | 0         | 0.62986667 | 0.000000 | 0   | 2  | 0.000000 | 0.000000  |
| Inner Neritic (Fine S | 0         | 0.62986667 | 0.000000 | 0   | 1  | 0.000000 | 0.000000  |
| Inner Neritic (Silt)  | 0.6298667 | 0.62986667 | 1.000000 | 1   | 6  | 0.166667 | 16.666667 |
| Middle Neritic        | 0         | 0.62986667 | 0.000000 | 0   | 6  | 0.000000 | 0.000000  |
| Outer Neritic         | 0         | 0.62986667 | 0.000000 | 0   | 5  | 0.000000 | 0.000000  |
| Upper Bathyal         | 0         | 0.62986667 | 0.000000 | 0   | 6  | 0.000000 | 0.000000  |
| Lower Bathyal         | 0         | 0.62986667 | 0.000000 | 0   | 9  | 0.000000 | 0.000000  |

0.6298667

#### 52 *Lagena sulcata*

| Environment           | Nij       | Ni       | Aij      | Mij | Mi | Bij      | IV ij     |
|-----------------------|-----------|----------|----------|-----|----|----------|-----------|
| Transitional          | 0         | 14.90032 | 0.000000 | 0   | 2  | 0.000000 | 0.000000  |
| Inner Neritic (Fine S | 0         | 14.90032 | 0.000000 | 0   | 1  | 0.000000 | 0.000000  |
| Inner Neritic (Silt)  | 0.6298667 | 14.90032 | 0.042272 | 1   | 6  | 0.166667 | 0.704534  |
| Middle Neritic        | 3.0765333 | 14.90032 | 0.206474 | 4   | 6  | 0.666667 | 13.764954 |
| Outer Neritic         | 11.19392  | 14.90032 | 0.751254 | 3   | 5  | 0.600000 | 45.075220 |
| Upper Bathyal         | 0         | 14.90032 | 0.000000 | 0   | 6  | 0.000000 | 0.000000  |
| Lower Bathyal         | 0         | 14.90032 | 0.000000 | 0   | 9  | 0.000000 | 0.000000  |

14.90032

#### 53 *Cassidulina pacifica*

| Environment           | Nij       | Ni     | Aij      | Mij | Mi | Bij      | IV ij     |
|-----------------------|-----------|--------|----------|-----|----|----------|-----------|
| Transitional          | 0         | 87.944 | 0.000000 | 0   | 2  | 0.000000 | 0.000000  |
| Inner Neritic (Fine S | 0         | 87.944 | 0.000000 | 0   | 1  | 0.000000 | 0.000000  |
| Inner Neritic (Silt)  | 2.5765333 | 87.944 | 0.029297 | 1   | 6  | 0.166667 | 0.488291  |
| Middle Neritic        | 0         | 87.944 | 0.000000 | 0   | 6  | 0.000000 | 0.000000  |
| Outer Neritic         | 0         | 87.944 | 0.000000 | 0   | 5  | 0.000000 | 0.000000  |
| Upper Bathyal         | 85.367467 | 87.944 | 0.970703 | 1   | 6  | 0.166667 | 16.178376 |
| Lower Bathyal         | 0         | 87.944 | 0.000000 | 0   | 9  | 0.000000 | 0.000000  |

87.944

#### 54 *Bulimina sp.*

| Environment           | Nij       | Ni         | Aij      | Mij | Mi | Bij      | IV ij     |
|-----------------------|-----------|------------|----------|-----|----|----------|-----------|
| Transitional          | 0         | 454.605867 | 0.000000 | 0   | 2  | 0.000000 | 0.000000  |
| Inner Neritic (Fine S | 0         | 454.605867 | 0.000000 | 0   | 1  | 0.000000 | 0.000000  |
| Inner Neritic (Silt)  | 15.332267 | 454.605867 | 0.033727 | 4   | 6  | 0.666667 | 2.248434  |
| Middle Neritic        | 1.2282667 | 454.605867 | 0.002702 | 2   | 6  | 0.333333 | 0.090061  |
| Outer Neritic         | 0.2       | 454.605867 | 0.000440 | 1   | 5  | 0.200000 | 0.008799  |
| Upper Bathyal         | 266.83733 | 454.605867 | 0.586964 | 3   | 6  | 0.500000 | 29.348206 |
| Lower Bathyal         | 171.008   | 454.605867 | 0.376168 | 1   | 9  | 0.111111 | 4.179640  |

454.60587

#### 55 *Cibicides refulgens*

| Environment           | Nij       | Ni         | Aij      | Mij | Mi | Bij      | IV ij     |
|-----------------------|-----------|------------|----------|-----|----|----------|-----------|
| Transitional          | 0         | 3.20186667 | 0.000000 | 0   | 2  | 0.000000 | 0.000000  |
| Inner Neritic (Fine S | 0         | 3.20186667 | 0.000000 | 0   | 1  | 0.000000 | 0.000000  |
| Inner Neritic (Silt)  | 2.5765333 | 3.20186667 | 0.804697 | 1   | 6  | 0.166667 | 13.411621 |
| Middle Neritic        | 0.6253333 | 3.20186667 | 0.195303 | 2   | 6  | 0.333333 | 6.510091  |
| Outer Neritic         | 0         | 3.20186667 | 0.000000 | 0   | 5  | 0.000000 | 0.000000  |
| Upper Bathyal         | 0         | 3.20186667 | 0.000000 | 0   | 6  | 0.000000 | 0.000000  |
| Lower Bathyal         | 0         | 3.20186667 | 0.000000 | 0   | 9  | 0.000000 | 0.000000  |

3.2018667

56 *Anomalina sp.*

| Environment           | Nij       | Ni         | Aij      | Mij | Mi | Bij      | IV ij     |
|-----------------------|-----------|------------|----------|-----|----|----------|-----------|
| Transitional          | 0         | 93.5274667 | 0.000000 | 0   | 2  | 0.000000 | 0.000000  |
| Inner Neritic (Fine S | 0         | 93.5274667 | 0.000000 | 0   | 1  | 0.000000 | 0.000000  |
| Inner Neritic (Silt)  | 7.7253333 | 93.5274667 | 0.082600 | 2   | 6  | 0.333333 | 2.753321  |
| Middle Neritic        | 0.4346667 | 93.5274667 | 0.004647 | 1   | 6  | 0.166667 | 0.077458  |
| Outer Neritic         | 0         | 93.5274667 | 0.000000 | 0   | 5  | 0.000000 | 0.000000  |
| Upper Bathyal         | 85.367467 | 93.5274667 | 0.912753 | 1   | 6  | 0.166667 | 15.212548 |
| Lower Bathyal         | 0         | 93.5274667 | 0.000000 | 0   | 9  | 0.000000 | 0.000000  |

93.527467

57 *Uvigerina sp.*

| Environment           | Nij       | Ni       | Aij      | Mij | Mi | Bij      | IV ij     |
|-----------------------|-----------|----------|----------|-----|----|----------|-----------|
| Transitional          | 0         | 537.4896 | 0.000000 | 0   | 2  | 0.000000 | 0.000000  |
| Inner Neritic (Fine S | 0         | 537.4896 | 0.000000 | 0   | 1  | 0.000000 | 0.000000  |
| Inner Neritic (Silt)  | 0.824     | 537.4896 | 0.001533 | 1   | 6  | 0.166667 | 0.025551  |
| Middle Neritic        | 0         | 537.4896 | 0.000000 | 0   | 6  | 0.000000 | 0.000000  |
| Outer Neritic         | 0.2       | 537.4896 | 0.000372 | 1   | 5  | 0.200000 | 0.007442  |
| Upper Bathyal         | 192.08533 | 537.4896 | 0.357375 | 3   | 6  | 0.500000 | 17.868749 |
| Lower Bathyal         | 344.38027 | 537.4896 | 0.640720 | 4   | 9  | 0.444444 | 28.476439 |

537.4896

58 *Bolivina sp.*

| Environment           | Nij       | Ni         | Aij      | Mij | Mi | Bij      | IV ij     |
|-----------------------|-----------|------------|----------|-----|----|----------|-----------|
| Transitional          | 0         | 246.147733 | 0.000000 | 0   | 2  | 0.000000 | 0.000000  |
| Inner Neritic (Fine S | 0         | 246.147733 | 0.000000 | 0   | 1  | 0.000000 | 0.000000  |
| Inner Neritic (Silt)  | 6.8330667 | 246.147733 | 0.027760 | 1   | 6  | 0.166667 | 0.462667  |
| Middle Neritic        | 0.1146667 | 246.147733 | 0.000466 | 1   | 6  | 0.166667 | 0.007764  |
| Outer Neritic         | 239.2     | 246.147733 | 0.971774 | 1   | 5  | 0.200000 | 19.435483 |
| Upper Bathyal         | 0         | 246.147733 | 0.000000 | 0   | 6  | 0.000000 | 0.000000  |
| Lower Bathyal         | 0         | 246.147733 | 0.000000 | 0   | 9  | 0.000000 | 0.000000  |

246.14773

59 *Lagena semilineata*

| Environment           | Nij       | Ni         | Aij      | Mij | Mi | Bij      | IV ij     |
|-----------------------|-----------|------------|----------|-----|----|----------|-----------|
| Transitional          | 0         | 91.8928889 | 0.000000 | 0   | 2  | 0.000000 | 0.000000  |
| Inner Neritic (Fine S | 0         | 91.8928889 | 0.000000 | 0   | 1  | 0.000000 | 0.000000  |
| Inner Neritic (Silt)  | 3.4506667 | 91.8928889 | 0.037551 | 1   | 6  | 0.166667 | 0.625849  |
| Middle Neritic        | 1.244     | 91.8928889 | 0.013538 | 2   | 6  | 0.333333 | 0.451250  |
| Outer Neritic         | 0         | 91.8928889 | 0.000000 | 0   | 5  | 0.000000 | 0.000000  |
| Upper Bathyal         | 85.418667 | 91.8928889 | 0.929546 | 1   | 6  | 0.166667 | 15.492433 |
| Lower Bathyal         | 1.7795556 | 91.8928889 | 0.019366 | 1   | 9  | 0.111111 | 0.215173  |

91.892889

60 *Lagena laevis*

| Environment           | Nij       | Ni         | Aij      | Mij | Mi | Bij      | IV ij     |
|-----------------------|-----------|------------|----------|-----|----|----------|-----------|
| Transitional          | 0         | 178.913813 | 0.000000 | 0   | 2  | 0.000000 | 0.000000  |
| Inner Neritic (Fine S | 0         | 178.913813 | 0.000000 | 0   | 1  | 0.000000 | 0.000000  |
| Inner Neritic (Silt)  | 3.4506667 | 178.913813 | 0.019287 | 1   | 6  | 0.166667 | 0.321446  |
| Middle Neritic        | 2.1157333 | 178.913813 | 0.011825 | 3   | 6  | 0.500000 | 0.591272  |
| Outer Neritic         | 2.51008   | 178.913813 | 0.014030 | 1   | 5  | 0.200000 | 0.280591  |
| Upper Bathyal         | 170.83733 | 178.913813 | 0.954858 | 1   | 6  | 0.166667 | 15.914304 |
| Lower Bathyal         | 0         | 178.913813 | 0.000000 | 0   | 9  | 0.000000 | 0.000000  |

178.91381

61 *Nonion scaphum*

| Environment           | Nij       | Ni         | Aij      | Mij | Mi | Bij      | IV ij     |
|-----------------------|-----------|------------|----------|-----|----|----------|-----------|
| Transitional          | 0         | 76.6216133 | 0.000000 | 0   | 2  | 0.000000 | 0.000000  |
| Inner Neritic (Fine S | 0         | 76.6216133 | 0.000000 | 0   | 1  | 0.000000 | 0.000000  |
| Inner Neritic (Silt)  | 0         | 76.6216133 | 0.000000 | 0   | 6  | 0.000000 | 0.000000  |
| Middle Neritic        | 17.473333 | 76.6216133 | 0.228047 | 5   | 6  | 0.833333 | 19.003921 |
| Outer Neritic         | 59.14828  | 76.6216133 | 0.771953 | 4   | 5  | 0.800000 | 61.756236 |
| Upper Bathyal         | 0         | 76.6216133 | 0.000000 | 0   | 6  | 0.000000 | 0.000000  |
| Lower Bathyal         | 0         | 76.6216133 | 0.000000 | 0   | 9  | 0.000000 | 0.000000  |

76.621613

62 *Canceris auriculus*

| Environment           | Nij       | Ni       | Aij      | Mij | Mi | Bij      | IV ij     |
|-----------------------|-----------|----------|----------|-----|----|----------|-----------|
| Transitional          | 0         | 115.3292 | 0.000000 | 0   | 2  | 0.000000 | 0.000000  |
| Inner Neritic (Fine S | 0         | 115.3292 | 0.000000 | 0   | 1  | 0.000000 | 0.000000  |
| Inner Neritic (Silt)  | 0         | 115.3292 | 0.000000 | 0   | 6  | 0.000000 | 0.000000  |
| Middle Neritic        | 1.5286667 | 115.3292 | 0.013255 | 3   | 6  | 0.500000 | 0.662741  |
| Outer Neritic         | 0         | 115.3292 | 0.000000 | 0   | 5  | 0.000000 | 0.000000  |
| Upper Bathyal         | 0         | 115.3292 | 0.000000 | 0   | 6  | 0.000000 | 0.000000  |
| Lower Bathyal         | 113.80053 | 115.3292 | 0.986745 | 1   | 9  | 0.111111 | 10.963835 |

115.3292

63 *Neouvigerina ampullacea*

| Environment           | Nij       | Ni         | Aij      | Mij | Mi | Bij      | IV ij     |
|-----------------------|-----------|------------|----------|-----|----|----------|-----------|
| Transitional          | 0         | 808.261273 | 0.000000 | 0   | 2  | 0.000000 | 0.000000  |
| Inner Neritic (Fine S | 0         | 808.261273 | 0.000000 | 0   | 1  | 0.000000 | 0.000000  |
| Inner Neritic (Silt)  | 0         | 808.261273 | 0.000000 | 0   | 6  | 0.000000 | 0.000000  |
| Middle Neritic        | 5.4040333 | 808.261273 | 0.006686 | 5   | 6  | 0.833333 | 0.557167  |
| Outer Neritic         | 290.65244 | 808.261273 | 0.359602 | 3   | 5  | 0.600000 | 21.576125 |
| Upper Bathyal         | 512.2048  | 808.261273 | 0.633712 | 1   | 6  | 0.166667 | 10.561865 |
| Lower Bathyal         | 0         | 808.261273 | 0.000000 | 0   | 9  | 0.000000 | 0.000000  |

808.26127

64 *Calcarina splengeri*

| Environment           | Nij      | Ni       | Aij      | Mij | Mi | Bij      | IV ij     |
|-----------------------|----------|----------|----------|-----|----|----------|-----------|
| Transitional          | 0        | 96.85408 | 0.000000 | 0   | 2  | 0.000000 | 0.000000  |
| Inner Neritic (Fine S | 0        | 96.85408 | 0.000000 | 0   | 1  | 0.000000 | 0.000000  |
| Inner Neritic (Silt)  | 0        | 96.85408 | 0.000000 | 0   | 6  | 0.000000 | 0.000000  |
| Middle Neritic        | 1.192    | 96.85408 | 0.012307 | 2   | 6  | 0.333333 | 0.410239  |
| Outer Neritic         | 95.66208 | 96.85408 | 0.987693 | 1   | 5  | 0.200000 | 19.753857 |
| Upper Bathyal         | 0        | 96.85408 | 0.000000 | 0   | 6  | 0.000000 | 0.000000  |
| Lower Bathyal         | 0        | 96.85408 | 0.000000 | 0   | 9  | 0.000000 | 0.000000  |

96.85408

65 *Oolina striata*

| Environment           | Nij     | Ni      | Aij      | Mij | Mi | Bij      | IV ij     |
|-----------------------|---------|---------|----------|-----|----|----------|-----------|
| Transitional          | 0       | 86.7124 | 0.000000 | 0   | 2  | 0.000000 | 0.000000  |
| Inner Neritic (Fine S | 0       | 86.7124 | 0.000000 | 0   | 1  | 0.000000 | 0.000000  |
| Inner Neritic (Silt)  | 0       | 86.7124 | 0.000000 | 0   | 6  | 0.000000 | 0.000000  |
| Middle Neritic        | 1.362   | 86.7124 | 0.015707 | 2   | 6  | 0.333333 | 0.523570  |
| Outer Neritic         | 0       | 86.7124 | 0.000000 | 0   | 5  | 0.000000 | 0.000000  |
| Upper Bathyal         | 85.3504 | 86.7124 | 0.984293 | 1   | 6  | 0.166667 | 16.404882 |
| Lower Bathyal         | 0       | 86.7124 | 0.000000 | 0   | 9  | 0.000000 | 0.000000  |

86.7124

66 *Discorbis sp.*

| Environment           | Nij       | Ni         | Aij      | Mij | Mi | Bij      | IV ij     |
|-----------------------|-----------|------------|----------|-----|----|----------|-----------|
| Transitional          | 0         | 1.57733333 | 0.000000 | 0   | 2  | 0.000000 | 0.000000  |
| Inner Neritic (Fine S | 0         | 1.57733333 | 0.000000 | 0   | 1  | 0.000000 | 0.000000  |
| Inner Neritic (Silt)  | 0         | 1.57733333 | 0.000000 | 0   | 6  | 0.000000 | 0.000000  |
| Middle Neritic        | 1.5773333 | 1.57733333 | 1.000000 | 2   | 6  | 0.333333 | 33.333333 |
| Outer Neritic         | 0         | 1.57733333 | 0.000000 | 0   | 5  | 0.000000 | 0.000000  |
| Upper Bathyal         | 0         | 1.57733333 | 0.000000 | 0   | 6  | 0.000000 | 0.000000  |
| Lower Bathyal         | 0         | 1.57733333 | 0.000000 | 0   | 9  | 0.000000 | 0.000000  |

1.5773333

67 *Lagena substriata*

| Environment           | Nij     | Ni      | Aij      | Mij | Mi | Bij      | IV ij     |
|-----------------------|---------|---------|----------|-----|----|----------|-----------|
| Transitional          | 0       | 3.75408 | 0.000000 | 0   | 2  | 0.000000 | 0.000000  |
| Inner Neritic (Fine S | 0       | 3.75408 | 0.000000 | 0   | 1  | 0.000000 | 0.000000  |
| Inner Neritic (Silt)  | 0       | 3.75408 | 0.000000 | 0   | 6  | 0.000000 | 0.000000  |
| Middle Neritic        | 1.244   | 3.75408 | 0.331373 | 2   | 6  | 0.333333 | 11.045760 |
| Outer Neritic         | 2.51008 | 3.75408 | 0.668627 | 1   | 5  | 0.200000 | 13.372544 |
| Upper Bathyal         | 0       | 3.75408 | 0.000000 | 0   | 6  | 0.000000 | 0.000000  |
| Lower Bathyal         | 0       | 3.75408 | 0.000000 | 0   | 9  | 0.000000 | 0.000000  |

3.75408

68 *Siphonaperta sp.*

| Environment           | Nij       | Ni         | Aij      | Mij | Mi | Bij      | IV ij     |
|-----------------------|-----------|------------|----------|-----|----|----------|-----------|
| Transitional          | 0         | 2.15466667 | 0.000000 | 0   | 2  | 0.000000 | 0.000000  |
| Inner Neritic (Fine S | 0         | 2.15466667 | 0.000000 | 0   | 1  | 0.000000 | 0.000000  |
| Inner Neritic (Silt)  | 0         | 2.15466667 | 0.000000 | 0   | 6  | 0.000000 | 0.000000  |
| Middle Neritic        | 2.1546667 | 2.15466667 | 1.000000 | 1   | 6  | 0.166667 | 16.666667 |
| Outer Neritic         | 0         | 2.15466667 | 0.000000 | 0   | 5  | 0.000000 | 0.000000  |
| Upper Bathyal         | 0         | 2.15466667 | 0.000000 | 0   | 6  | 0.000000 | 0.000000  |
| Lower Bathyal         | 0         | 2.15466667 | 0.000000 | 0   | 9  | 0.000000 | 0.000000  |

2.1546667

69 *Heterolepa praecincta*

| Environment           | Nij       | Ni         | Aij      | Mij | Mi | Bij      | IV ij     |
|-----------------------|-----------|------------|----------|-----|----|----------|-----------|
| Transitional          | 0         | 837.420053 | 0.000000 | 0   | 2  | 0.000000 | 0.000000  |
| Inner Neritic (Fine S | 0         | 837.420053 | 0.000000 | 0   | 1  | 0.000000 | 0.000000  |
| Inner Neritic (Silt)  | 0         | 837.420053 | 0.000000 | 0   | 6  | 0.000000 | 0.000000  |
| Middle Neritic        | 5.8573333 | 837.420053 | 0.006994 | 2   | 6  | 0.333333 | 0.233150  |
| Outer Neritic         | 98.03552  | 837.420053 | 0.117069 | 3   | 5  | 0.600000 | 7.024111  |
| Upper Bathyal         | 448.256   | 837.420053 | 0.535282 | 3   | 6  | 0.500000 | 26.764107 |
| Lower Bathyal         | 285.2712  | 837.420053 | 0.340655 | 3   | 9  | 0.333333 | 11.355162 |

837.42005

70 *Bombulina echinata*

| Environment           | Nij       | Ni         | Aij      | Mij | Mi | Bij      | IV ij     |
|-----------------------|-----------|------------|----------|-----|----|----------|-----------|
| Transitional          | 0         | 0.33333333 | 0.000000 | 0   | 2  | 0.000000 | 0.000000  |
| Inner Neritic (Fine S | 0         | 0.33333333 | 0.000000 | 0   | 1  | 0.000000 | 0.000000  |
| Inner Neritic (Silt)  | 0         | 0.33333333 | 0.000000 | 0   | 6  | 0.000000 | 0.000000  |
| Middle Neritic        | 0.3333333 | 0.33333333 | 1.000000 | 2   | 6  | 0.333333 | 33.333333 |
| Outer Neritic         | 0         | 0.33333333 | 0.000000 | 0   | 5  | 0.000000 | 0.000000  |
| Upper Bathyal         | 0         | 0.33333333 | 0.000000 | 0   | 6  | 0.000000 | 0.000000  |
| Lower Bathyal         | 0         | 0.33333333 | 0.000000 | 0   | 9  | 0.000000 | 0.000000  |

0.3333333

71 *Brizalina striatula*

| Environment           | Nij       | Ni         | Aij      | Mij | Mi | Bij      | IV ij     |
|-----------------------|-----------|------------|----------|-----|----|----------|-----------|
| Transitional          | 0         | 459.473707 | 0.000000 | 0   | 2  | 0.000000 | 0.000000  |
| Inner Neritic (Fine S | 0         | 459.473707 | 0.000000 | 0   | 1  | 0.000000 | 0.000000  |
| Inner Neritic (Silt)  | 0         | 459.473707 | 0.000000 | 0   | 6  | 0.000000 | 0.000000  |
| Middle Neritic        | 2.7746667 | 459.473707 | 0.006039 | 2   | 6  | 0.333333 | 0.201293  |
| Outer Neritic         | 200.34464 | 459.473707 | 0.436031 | 4   | 5  | 0.800000 | 34.882456 |
| Upper Bathyal         | 256.3544  | 459.473707 | 0.557931 | 3   | 6  | 0.500000 | 27.896526 |
| Lower Bathyal         | 0         | 459.473707 | 0.000000 | 0   | 9  | 0.000000 | 0.000000  |

459.47371

72 *Nonionella simplex*

| Environment           | Nij       | Ni         | Aij      | Mij | Mi | Bij      | IV ij     |
|-----------------------|-----------|------------|----------|-----|----|----------|-----------|
| Transitional          | 0         | 0.33333333 | 0.000000 | 0   | 2  | 0.000000 | 0.000000  |
| Inner Neritic (Fine S | 0         | 0.33333333 | 0.000000 | 0   | 1  | 0.000000 | 0.000000  |
| Inner Neritic (Silt)  | 0         | 0.33333333 | 0.000000 | 0   | 6  | 0.000000 | 0.000000  |
| Middle Neritic        | 0.3333333 | 0.33333333 | 1.000000 | 2   | 6  | 0.333333 | 33.333333 |
| Outer Neritic         | 0         | 0.33333333 | 0.000000 | 0   | 5  | 0.000000 | 0.000000  |
| Upper Bathyal         | 0         | 0.33333333 | 0.000000 | 0   | 6  | 0.000000 | 0.000000  |
| Lower Bathyal         | 0         | 0.33333333 | 0.000000 | 0   | 9  | 0.000000 | 0.000000  |

0.3333333

73 *Elphidium advenum*

| Environment           | Nij       | Ni         | Aij      | Mij | Mi | Bij      | IV ij     |
|-----------------------|-----------|------------|----------|-----|----|----------|-----------|
| Transitional          | 0         | 0.14233333 | 0.000000 | 0   | 2  | 0.000000 | 0.000000  |
| Inner Neritic (Fine S | 0         | 0.14233333 | 0.000000 | 0   | 1  | 0.000000 | 0.000000  |
| Inner Neritic (Silt)  | 0         | 0.14233333 | 0.000000 | 0   | 6  | 0.000000 | 0.000000  |
| Middle Neritic        | 0.1423333 | 0.14233333 | 1.000000 | 1   | 6  | 0.166667 | 16.666667 |
| Outer Neritic         | 0         | 0.14233333 | 0.000000 | 0   | 5  | 0.000000 | 0.000000  |
| Upper Bathyal         | 0         | 0.14233333 | 0.000000 | 0   | 6  | 0.000000 | 0.000000  |
| Lower Bathyal         | 0         | 0.14233333 | 0.000000 | 0   | 9  | 0.000000 | 0.000000  |

0.1423333

74 *Brizalina earlandi*

| Environment           | Nij       | Ni         | Aij      | Mij | Mi | Bij      | IV ij     |
|-----------------------|-----------|------------|----------|-----|----|----------|-----------|
| Transitional          | 0         | 376.755487 | 0.000000 | 0   | 2  | 0.000000 | 0.000000  |
| Inner Neritic (Fine S | 0         | 376.755487 | 0.000000 | 0   | 1  | 0.000000 | 0.000000  |
| Inner Neritic (Silt)  | 0         | 376.755487 | 0.000000 | 0   | 6  | 0.000000 | 0.000000  |
| Middle Neritic        | 3.9610333 | 376.755487 | 0.010514 | 2   | 6  | 0.333333 | 0.350451  |
| Outer Neritic         | 230.47552 | 376.755487 | 0.611738 | 3   | 5  | 0.600000 | 36.704260 |
| Upper Bathyal         | 85.418667 | 376.755487 | 0.226722 | 1   | 6  | 0.166667 | 3.778696  |
| Lower Bathyal         | 56.900267 | 376.755487 | 0.151027 | 1   | 9  | 0.111111 | 1.678078  |

376.75549

75 *Asterorotalia sp.*

| Environment           | Nij       | Ni         | Aij      | Mij | Mi | Bij      | IV ij     |
|-----------------------|-----------|------------|----------|-----|----|----------|-----------|
| Transitional          | 0         | 0.15093333 | 0.000000 | 0   | 2  | 0.000000 | 0.000000  |
| Inner Neritic (Fine S | 0         | 0.15093333 | 0.000000 | 0   | 1  | 0.000000 | 0.000000  |
| Inner Neritic (Silt)  | 0         | 0.15093333 | 0.000000 | 0   | 6  | 0.000000 | 0.000000  |
| Middle Neritic        | 0.1509333 | 0.15093333 | 1.000000 | 1   | 6  | 0.166667 | 16.666667 |
| Outer Neritic         | 0         | 0.15093333 | 0.000000 | 0   | 5  | 0.000000 | 0.000000  |
| Upper Bathyal         | 0         | 0.15093333 | 0.000000 | 0   | 6  | 0.000000 | 0.000000  |
| Lower Bathyal         | 0         | 0.15093333 | 0.000000 | 0   | 9  | 0.000000 | 0.000000  |

0.1509333

76 *Lenticulina sp.*

| Environment           | Nij       | Ni        | Aij      | Mij | Mi | Bij      | IV ij     |
|-----------------------|-----------|-----------|----------|-----|----|----------|-----------|
| Transitional          | 0         | 580.67096 | 0.000000 | 0   | 2  | 0.000000 | 0.000000  |
| Inner Neritic (Fine S | 0         | 580.67096 | 0.000000 | 0   | 1  | 0.000000 | 0.000000  |
| Inner Neritic (Silt)  | 0         | 580.67096 | 0.000000 | 0   | 6  | 0.000000 | 0.000000  |
| Middle Neritic        | 0.2293333 | 580.67096 | 0.000395 | 1   | 6  | 0.166667 | 0.006582  |
| Outer Neritic         | 11.12736  | 580.67096 | 0.019163 | 3   | 5  | 0.600000 | 1.149776  |
| Upper Bathyal         | 341.6108  | 580.67096 | 0.588304 | 4   | 6  | 0.666667 | 39.220238 |
| Lower Bathyal         | 227.70347 | 580.67096 | 0.392139 | 2   | 9  | 0.222222 | 8.714190  |

580.67096

77 *Baculogypsinoidea spinosus*

| Environment           | Nij       | Ni         | Aij      | Mij | Mi | Bij      | IV ij     |
|-----------------------|-----------|------------|----------|-----|----|----------|-----------|
| Transitional          | 0         | 0.11466667 | 0.000000 | 0   | 2  | 0.000000 | 0.000000  |
| Inner Neritic (Fine S | 0         | 0.11466667 | 0.000000 | 0   | 1  | 0.000000 | 0.000000  |
| Inner Neritic (Silt)  | 0         | 0.11466667 | 0.000000 | 0   | 6  | 0.000000 | 0.000000  |
| Middle Neritic        | 0.1146667 | 0.11466667 | 1.000000 | 1   | 6  | 0.166667 | 16.666667 |
| Outer Neritic         | 0         | 0.11466667 | 0.000000 | 0   | 5  | 0.000000 | 0.000000  |
| Upper Bathyal         | 0         | 0.11466667 | 0.000000 | 0   | 6  | 0.000000 | 0.000000  |
| Lower Bathyal         | 0         | 0.11466667 | 0.000000 | 0   | 9  | 0.000000 | 0.000000  |

0.1146667

78 *Planorbulinella larvata*

| Environment           | Nij       | Ni         | Aij      | Mij | Mi | Bij      | IV ij     |
|-----------------------|-----------|------------|----------|-----|----|----------|-----------|
| Transitional          | 0         | 0.11466667 | 0.000000 | 0   | 2  | 0.000000 | 0.000000  |
| Inner Neritic (Fine S | 0         | 0.11466667 | 0.000000 | 0   | 1  | 0.000000 | 0.000000  |
| Inner Neritic (Silt)  | 0         | 0.11466667 | 0.000000 | 0   | 6  | 0.000000 | 0.000000  |
| Middle Neritic        | 0.1146667 | 0.11466667 | 1.000000 | 1   | 6  | 0.166667 | 16.666667 |
| Outer Neritic         | 0         | 0.11466667 | 0.000000 | 0   | 5  | 0.000000 | 0.000000  |
| Upper Bathyal         | 0         | 0.11466667 | 0.000000 | 0   | 6  | 0.000000 | 0.000000  |
| Lower Bathyal         | 0         | 0.11466667 | 0.000000 | 0   | 9  | 0.000000 | 0.000000  |

0.1146667

79 *Lenticulina vortex*

| Environment           | Nij       | Ni         | Aij      | Mij | Mi | Bij      | IV ij     |
|-----------------------|-----------|------------|----------|-----|----|----------|-----------|
| Transitional          | 0         | 0.11466667 | 0.000000 | 0   | 2  | 0.000000 | 0.000000  |
| Inner Neritic (Fine S | 0         | 0.11466667 | 0.000000 | 0   | 1  | 0.000000 | 0.000000  |
| Inner Neritic (Silt)  | 0         | 0.11466667 | 0.000000 | 0   | 6  | 0.000000 | 0.000000  |
| Middle Neritic        | 0.1146667 | 0.11466667 | 1.000000 | 1   | 6  | 0.166667 | 16.666667 |
| Outer Neritic         | 0         | 0.11466667 | 0.000000 | 0   | 5  | 0.000000 | 0.000000  |
| Upper Bathyal         | 0         | 0.11466667 | 0.000000 | 0   | 6  | 0.000000 | 0.000000  |
| Lower Bathyal         | 0         | 0.11466667 | 0.000000 | 0   | 9  | 0.000000 | 0.000000  |

0.1146667

80 *Gyroidina neosoldanii*

| Environment           | Nij       | Ni         | Aij      | Mij | Mi | Bij      | IV ij     |
|-----------------------|-----------|------------|----------|-----|----|----------|-----------|
| Transitional          | 0         | 342.499156 | 0.000000 | 0   | 2  | 0.000000 | 0.000000  |
| Inner Neritic (Fine S | 0         | 342.499156 | 0.000000 | 0   | 1  | 0.000000 | 0.000000  |
| Inner Neritic (Silt)  | 0         | 342.499156 | 0.000000 | 0   | 6  | 0.000000 | 0.000000  |
| Middle Neritic        | 0.2293333 | 342.499156 | 0.000670 | 1   | 6  | 0.166667 | 0.011160  |
| Outer Neritic         | 0.2       | 342.499156 | 0.000584 | 1   | 5  | 0.200000 | 0.011679  |
| Upper Bathyal         | 341.54253 | 342.499156 | 0.997207 | 3   | 6  | 0.500000 | 49.860347 |
| Lower Bathyal         | 0.5272889 | 342.499156 | 0.001540 | 1   | 9  | 0.111111 | 0.017106  |

342.49916

81 *Astacolus crepidulus*

| Environment           | Nij       | Ni        | Aij      | Mij | Mi | Bij      | IV ij     |
|-----------------------|-----------|-----------|----------|-----|----|----------|-----------|
| Transitional          | 0         | 0.1146667 | 0.000000 | 0   | 2  | 0.000000 | 0.000000  |
| Inner Neritic (Fine S | 0         | 0.1146667 | 0.000000 | 0   | 1  | 0.000000 | 0.000000  |
| Inner Neritic (Silt)  | 0         | 0.1146667 | 0.000000 | 0   | 6  | 0.000000 | 0.000000  |
| Middle Neritic        | 0.1146667 | 0.1146667 | 1.000000 | 1   | 6  | 0.166667 | 16.666667 |
| Outer Neritic         | 0         | 0.1146667 | 0.000000 | 0   | 5  | 0.000000 | 0.000000  |
| Upper Bathyal         | 0         | 0.1146667 | 0.000000 | 0   | 6  | 0.000000 | 0.000000  |
| Lower Bathyal         | 0         | 0.1146667 | 0.000000 | 0   | 9  | 0.000000 | 0.000000  |

0.1146667

82 *Glandulina laevigata*

| Environment           | Nij       | Ni        | Aij      | Mij | Mi | Bij      | IV ij     |
|-----------------------|-----------|-----------|----------|-----|----|----------|-----------|
| Transitional          | 0         | 0.1146667 | 0.000000 | 0   | 2  | 0.000000 | 0.000000  |
| Inner Neritic (Fine S | 0         | 0.1146667 | 0.000000 | 0   | 1  | 0.000000 | 0.000000  |
| Inner Neritic (Silt)  | 0         | 0.1146667 | 0.000000 | 0   | 6  | 0.000000 | 0.000000  |
| Middle Neritic        | 0.1146667 | 0.1146667 | 1.000000 | 1   | 6  | 0.166667 | 16.666667 |
| Outer Neritic         | 0         | 0.1146667 | 0.000000 | 0   | 5  | 0.000000 | 0.000000  |
| Upper Bathyal         | 0         | 0.1146667 | 0.000000 | 0   | 6  | 0.000000 | 0.000000  |
| Lower Bathyal         | 0         | 0.1146667 | 0.000000 | 0   | 9  | 0.000000 | 0.000000  |

0.1146667

83 *Siphonina tubulosa*

| Environment           | Nij       | Ni         | Aij      | Mij | Mi | Bij      | IV ij     |
|-----------------------|-----------|------------|----------|-----|----|----------|-----------|
| Transitional          | 0         | 47.9457067 | 0.000000 | 0   | 2  | 0.000000 | 0.000000  |
| Inner Neritic (Fine S | 0         | 47.9457067 | 0.000000 | 0   | 1  | 0.000000 | 0.000000  |
| Inner Neritic (Silt)  | 0         | 47.9457067 | 0.000000 | 0   | 6  | 0.000000 | 0.000000  |
| Middle Neritic        | 0.1146667 | 47.9457067 | 0.002392 | 1   | 6  | 0.166667 | 0.039860  |
| Outer Neritic         | 47.83104  | 47.9457067 | 0.997608 | 1   | 5  | 0.200000 | 19.952168 |
| Upper Bathyal         | 0         | 47.9457067 | 0.000000 | 0   | 6  | 0.000000 | 0.000000  |
| Lower Bathyal         | 0         | 47.9457067 | 0.000000 | 0   | 9  | 0.000000 | 0.000000  |

47.945707

84 *Vulvulina pennatula*

| Environment           | Nij       | Ni       | Aij      | Mij | Mi | Bij      | IV ij     |
|-----------------------|-----------|----------|----------|-----|----|----------|-----------|
| Transitional          | 0         | 221.8224 | 0.000000 | 0   | 2  | 0.000000 | 0.000000  |
| Inner Neritic (Fine S | 0         | 221.8224 | 0.000000 | 0   | 1  | 0.000000 | 0.000000  |
| Inner Neritic (Silt)  | 0         | 221.8224 | 0.000000 | 0   | 6  | 0.000000 | 0.000000  |
| Middle Neritic        | 1.304     | 221.8224 | 0.005879 | 1   | 6  | 0.166667 | 0.097976  |
| Outer Neritic         | 0         | 221.8224 | 0.000000 | 0   | 5  | 0.000000 | 0.000000  |
| Upper Bathyal         | 106.71787 | 221.8224 | 0.481096 | 2   | 6  | 0.333333 | 16.036533 |
| Lower Bathyal         | 113.80053 | 221.8224 | 0.513025 | 1   | 9  | 0.111111 | 5.700283  |

221.8224

85 *Gyroidina broeckhiana*

| Environment           | Nij       | Ni         | Aij      | Mij | Mi | Bij      | IV ij     |
|-----------------------|-----------|------------|----------|-----|----|----------|-----------|
| Transitional          | 0         | 1327.64382 | 0.000000 | 0   | 2  | 0.000000 | 0.000000  |
| Inner Neritic (Fine S | 0         | 1327.64382 | 0.000000 | 0   | 1  | 0.000000 | 0.000000  |
| Inner Neritic (Silt)  | 0         | 1327.64382 | 0.000000 | 0   | 6  | 0.000000 | 0.000000  |
| Middle Neritic        | 3.912     | 1327.64382 | 0.002947 | 1   | 6  | 0.166667 | 0.049110  |
| Outer Neritic         | 1152.672  | 1327.64382 | 0.868209 | 3   | 5  | 0.600000 | 52.092526 |
| Upper Bathyal         | 170.83733 | 1327.64382 | 0.128677 | 1   | 6  | 0.166667 | 2.144618  |
| Lower Bathyal         | 0.2224889 | 1327.64382 | 0.000168 | 1   | 9  | 0.111111 | 0.001862  |

1327.6438

86 *Lenticulina orbicularis*

| Environment           | Nij       | Ni         | Aij      | Mij | Mi | Bij      | IV ij     |
|-----------------------|-----------|------------|----------|-----|----|----------|-----------|
| Transitional          | 0         | 1311.63458 | 0.000000 | 0   | 2  | 0.000000 | 0.000000  |
| Inner Neritic (Fine S | 0         | 1311.63458 | 0.000000 | 0   | 1  | 0.000000 | 0.000000  |
| Inner Neritic (Silt)  | 0         | 1311.63458 | 0.000000 | 0   | 6  | 0.000000 | 0.000000  |
| Middle Neritic        | 1.7386667 | 1311.63458 | 0.001326 | 1   | 6  | 0.166667 | 0.022093  |
| Outer Neritic         | 104.936   | 1311.63458 | 0.080004 | 4   | 5  | 0.800000 | 6.400319  |
| Upper Bathyal         | 747.26    | 1311.63458 | 0.569717 | 5   | 6  | 0.833333 | 47.476384 |
| Lower Bathyal         | 457.69991 | 1311.63458 | 0.348954 | 3   | 9  | 0.333333 | 11.631794 |

1311.6346

87 *Planularia australis*

| Environment           | Nij       | Ni         | Aij      | Mij | Mi | Bij      | IV ij     |
|-----------------------|-----------|------------|----------|-----|----|----------|-----------|
| Transitional          | 0         | 0.56138667 | 0.000000 | 0   | 2  | 0.000000 | 0.000000  |
| Inner Neritic (Fine S | 0         | 0.56138667 | 0.000000 | 0   | 1  | 0.000000 | 0.000000  |
| Inner Neritic (Silt)  | 0         | 0.56138667 | 0.000000 | 0   | 6  | 0.000000 | 0.000000  |
| Middle Neritic        | 0.4346667 | 0.56138667 | 0.774273 | 1   | 6  | 0.166667 | 12.904554 |
| Outer Neritic         | 0.12672   | 0.56138667 | 0.225727 | 1   | 5  | 0.200000 | 4.514535  |
| Upper Bathyal         | 0         | 0.56138667 | 0.000000 | 0   | 6  | 0.000000 | 0.000000  |
| Lower Bathyal         | 0         | 0.56138667 | 0.000000 | 0   | 9  | 0.000000 | 0.000000  |

0.5613867

88 *Saracenaria italica*

| Environment           | Nij       | Ni         | Aij      | Mij | Mi | Bij      | IV ij     |
|-----------------------|-----------|------------|----------|-----|----|----------|-----------|
| Transitional          | 0         | 171.514187 | 0.000000 | 0   | 2  | 0.000000 | 0.000000  |
| Inner Neritic (Fine S | 0         | 171.514187 | 0.000000 | 0   | 1  | 0.000000 | 0.000000  |
| Inner Neritic (Silt)  | 0         | 171.514187 | 0.000000 | 0   | 6  | 0.000000 | 0.000000  |
| Middle Neritic        | 0.4346667 | 171.514187 | 0.002534 | 1   | 6  | 0.166667 | 0.042238  |
| Outer Neritic         | 0.12672   | 171.514187 | 0.000739 | 1   | 5  | 0.200000 | 0.014777  |
| Upper Bathyal         | 170.9528  | 171.514187 | 0.996727 | 3   | 6  | 0.500000 | 49.836344 |
| Lower Bathyal         | 0         | 171.514187 | 0.000000 | 0   | 9  | 0.000000 | 0.000000  |

171.51419

89 *Eponides schreibersi*

| Environment           | Nij       | Ni         | Aij      | Mij | Mi | Bij      | IV ij     |
|-----------------------|-----------|------------|----------|-----|----|----------|-----------|
| Transitional          | 0         | 3.04277333 | 0.000000 | 0   | 2  | 0.000000 | 0.000000  |
| Inner Neritic (Fine S | 0         | 3.04277333 | 0.000000 | 0   | 1  | 0.000000 | 0.000000  |
| Inner Neritic (Silt)  | 0         | 3.04277333 | 0.000000 | 0   | 6  | 0.000000 | 0.000000  |
| Middle Neritic        | 0.8693333 | 3.04277333 | 0.285704 | 1   | 6  | 0.166667 | 4.761738  |
| Outer Neritic         | 2.17344   | 3.04277333 | 0.714296 | 1   | 5  | 0.200000 | 14.285915 |
| Upper Bathyal         | 0         | 3.04277333 | 0.000000 | 0   | 6  | 0.000000 | 0.000000  |
| Lower Bathyal         | 0         | 3.04277333 | 0.000000 | 0   | 9  | 0.000000 | 0.000000  |

3.0427733

90 *Guttulina problema*

| Environment           | Nij       | Ni         | Aij      | Mij | Mi | Bij      | IV ij     |
|-----------------------|-----------|------------|----------|-----|----|----------|-----------|
| Transitional          | 0         | 0.43466667 | 0.000000 | 0   | 2  | 0.000000 | 0.000000  |
| Inner Neritic (Fine S | 0         | 0.43466667 | 0.000000 | 0   | 1  | 0.000000 | 0.000000  |
| Inner Neritic (Silt)  | 0         | 0.43466667 | 0.000000 | 0   | 6  | 0.000000 | 0.000000  |
| Middle Neritic        | 0.4346667 | 0.43466667 | 1.000000 | 1   | 6  | 0.166667 | 16.666667 |
| Outer Neritic         | 0         | 0.43466667 | 0.000000 | 0   | 5  | 0.000000 | 0.000000  |
| Upper Bathyal         | 0         | 0.43466667 | 0.000000 | 0   | 6  | 0.000000 | 0.000000  |
| Lower Bathyal         | 0         | 0.43466667 | 0.000000 | 0   | 9  | 0.000000 | 0.000000  |

0.4346667



91 *Brizalina alata*

| Environment           | Nij       | Ni         | Aij      | Mij | Mi | Bij      | IV ij     |
|-----------------------|-----------|------------|----------|-----|----|----------|-----------|
| Transitional          | 0         | 0.43466667 | 0.000000 | 0   | 2  | 0.000000 | 0.000000  |
| Inner Neritic (Fine S | 0         | 0.43466667 | 0.000000 | 0   | 1  | 0.000000 | 0.000000  |
| Inner Neritic (Silt)  | 0         | 0.43466667 | 0.000000 | 0   | 6  | 0.000000 | 0.000000  |
| Middle Neritic        | 0.4346667 | 0.43466667 | 1.000000 | 1   | 6  | 0.166667 | 16.666667 |
| Outer Neritic         | 0         | 0.43466667 | 0.000000 | 0   | 5  | 0.000000 | 0.000000  |
| Upper Bathyal         | 0         | 0.43466667 | 0.000000 | 0   | 6  | 0.000000 | 0.000000  |
| Lower Bathyal         | 0         | 0.43466667 | 0.000000 | 0   | 9  | 0.000000 | 0.000000  |

0.4346667

92 *Nodosaria albatrossi*

| Environment           | Nij       | Ni      | Aij      | Mij | Mi | Bij      | IV ij     |
|-----------------------|-----------|---------|----------|-----|----|----------|-----------|
| Transitional          | 0         | 1.28944 | 0.000000 | 0   | 2  | 0.000000 | 0.000000  |
| Inner Neritic (Fine S | 0         | 1.28944 | 0.000000 | 0   | 1  | 0.000000 | 0.000000  |
| Inner Neritic (Silt)  | 0         | 1.28944 | 0.000000 | 0   | 6  | 0.000000 | 0.000000  |
| Middle Neritic        | 0.8693333 | 1.28944 | 0.674194 | 1   | 6  | 0.166667 | 11.236575 |
| Outer Neritic         | 0.25344   | 1.28944 | 0.196550 | 1   | 5  | 0.200000 | 3.931009  |
| Upper Bathyal         | 0.1666667 | 1.28944 | 0.129255 | 1   | 6  | 0.166667 | 2.154251  |
| Lower Bathyal         | 0         | 1.28944 | 0.000000 | 0   | 9  | 0.000000 | 0.000000  |

1.28944

93 *Lenticulina calcar*

| Environment           | Nij       | Ni         | Aij      | Mij | Mi | Bij      | IV ij     |
|-----------------------|-----------|------------|----------|-----|----|----------|-----------|
| Transitional          | 0         | 513.325333 | 0.000000 | 0   | 2  | 0.000000 | 0.000000  |
| Inner Neritic (Fine S | 0         | 513.325333 | 0.000000 | 0   | 1  | 0.000000 | 0.000000  |
| Inner Neritic (Silt)  | 0         | 513.325333 | 0.000000 | 0   | 6  | 0.000000 | 0.000000  |
| Middle Neritic        | 0.8693333 | 513.325333 | 0.001694 | 1   | 6  | 0.166667 | 0.028226  |
| Outer Neritic         | 0.2       | 513.325333 | 0.000390 | 1   | 5  | 0.200000 | 0.007792  |
| Upper Bathyal         | 512.256   | 513.325333 | 0.997917 | 2   | 6  | 0.333333 | 33.263895 |
| Lower Bathyal         | 0         | 513.325333 | 0.000000 | 0   | 9  | 0.000000 | 0.000000  |

513.32533

94 *Siphogenerina tropica*

| Environment           | Nij       | Ni         | Aij      | Mij | Mi | Bij      | IV ij     |
|-----------------------|-----------|------------|----------|-----|----|----------|-----------|
| Transitional          | 0         | 0.60133333 | 0.000000 | 0   | 2  | 0.000000 | 0.000000  |
| Inner Neritic (Fine S | 0         | 0.60133333 | 0.000000 | 0   | 1  | 0.000000 | 0.000000  |
| Inner Neritic (Silt)  | 0         | 0.60133333 | 0.000000 | 0   | 6  | 0.000000 | 0.000000  |
| Middle Neritic        | 0.4346667 | 0.60133333 | 0.722838 | 1   | 6  | 0.166667 | 12.047302 |
| Outer Neritic         | 0         | 0.60133333 | 0.000000 | 0   | 5  | 0.000000 | 0.000000  |
| Upper Bathyal         | 0.1666667 | 0.60133333 | 0.277162 | 1   | 6  | 0.166667 | 4.619364  |
| Lower Bathyal         | 0         | 0.60133333 | 0.000000 | 0   | 9  | 0.000000 | 0.000000  |

0.6013333

95 *Amphicoryna scalaris*

| Environment           | Nij       | Ni      | Aij      | Mij | Mi | Bij      | IV ij     |
|-----------------------|-----------|---------|----------|-----|----|----------|-----------|
| Transitional          | 0         | 299.152 | 0.000000 | 0   | 2  | 0.000000 | 0.000000  |
| Inner Neritic (Fine S | 0         | 299.152 | 0.000000 | 0   | 1  | 0.000000 | 0.000000  |
| Inner Neritic (Silt)  | 0         | 299.152 | 0.000000 | 0   | 6  | 0.000000 | 0.000000  |
| Middle Neritic        | 0.4346667 | 299.152 | 0.001453 | 1   | 6  | 0.166667 | 0.024217  |
| Outer Neritic         | 13.704    | 299.152 | 0.045809 | 4   | 5  | 0.800000 | 3.664759  |
| Upper Bathyal         | 0         | 299.152 | 0.000000 | 0   | 6  | 0.000000 | 0.000000  |
| Lower Bathyal         | 285.01333 | 299.152 | 0.952738 | 1   | 9  | 0.111111 | 10.585972 |

299.152

96 *Nodosaria catesbyi*

| Environment           | Nij   | Ni    | Aij      | Mij | Mi | Bij      | IV ij     |
|-----------------------|-------|-------|----------|-----|----|----------|-----------|
| Transitional          | 0     | 1.304 | 0.000000 | 0   | 2  | 0.000000 | 0.000000  |
| Inner Neritic (Fine S | 0     | 1.304 | 0.000000 | 0   | 1  | 0.000000 | 0.000000  |
| Inner Neritic (Silt)  | 0     | 1.304 | 0.000000 | 0   | 6  | 0.000000 | 0.000000  |
| Middle Neritic        | 1.304 | 1.304 | 1.000000 | 1   | 6  | 0.166667 | 16.666667 |
| Outer Neritic         | 0     | 1.304 | 0.000000 | 0   | 5  | 0.000000 | 0.000000  |
| Upper Bathyal         | 0     | 1.304 | 0.000000 | 0   | 6  | 0.000000 | 0.000000  |
| Lower Bathyal         | 0     | 1.304 | 0.000000 | 0   | 9  | 0.000000 | 0.000000  |

1.304

97 *Virgulina pauciloculata*

| Environment           | Nij       | Ni         | Aij      | Mij | Mi | Bij      | IV ij     |
|-----------------------|-----------|------------|----------|-----|----|----------|-----------|
| Transitional          | 0         | 8.10140444 | 0.000000 | 0   | 2  | 0.000000 | 0.000000  |
| Inner Neritic (Fine S | 0         | 8.10140444 | 0.000000 | 0   | 1  | 0.000000 | 0.000000  |
| Inner Neritic (Silt)  | 0         | 8.10140444 | 0.000000 | 0   | 6  | 0.000000 | 0.000000  |
| Middle Neritic        | 0         | 8.10140444 | 0.000000 | 0   | 6  | 0.000000 | 0.000000  |
| Outer Neritic         | 7.65696   | 8.10140444 | 0.945140 | 2   | 5  | 0.400000 | 37.805593 |
| Upper Bathyal         | 0         | 8.10140444 | 0.000000 | 0   | 6  | 0.000000 | 0.000000  |
| Lower Bathyal         | 0.4444444 | 8.10140444 | 0.054860 | 1   | 9  | 0.111111 | 0.609557  |

8.1014044

98 *Heterolepa subhaidingeri*

| Environment           | Nij     | Ni      | Aij      | Mij | Mi | Bij      | IV ij     |
|-----------------------|---------|---------|----------|-----|----|----------|-----------|
| Transitional          | 0       | 2.17344 | 0.000000 | 0   | 2  | 0.000000 | 0.000000  |
| Inner Neritic (Fine S | 0       | 2.17344 | 0.000000 | 0   | 1  | 0.000000 | 0.000000  |
| Inner Neritic (Silt)  | 0       | 2.17344 | 0.000000 | 0   | 6  | 0.000000 | 0.000000  |
| Middle Neritic        | 0       | 2.17344 | 0.000000 | 0   | 6  | 0.000000 | 0.000000  |
| Outer Neritic         | 2.17344 | 2.17344 | 1.000000 | 1   | 5  | 0.200000 | 20.000000 |
| Upper Bathyal         | 0       | 2.17344 | 0.000000 | 0   | 6  | 0.000000 | 0.000000  |
| Lower Bathyal         | 0       | 2.17344 | 0.000000 | 0   | 9  | 0.000000 | 0.000000  |

2.17344

99 *Trifarina bradyi*

| Environment           | Nij       | Ni         | Aij      | Mij | Mi | Bij      | IV ij     |
|-----------------------|-----------|------------|----------|-----|----|----------|-----------|
| Transitional          | 0         | 2.34010667 | 0.000000 | 0   | 2  | 0.000000 | 0.000000  |
| Inner Neritic (Fine S | 0         | 2.34010667 | 0.000000 | 0   | 1  | 0.000000 | 0.000000  |
| Inner Neritic (Silt)  | 0         | 2.34010667 | 0.000000 | 0   | 6  | 0.000000 | 0.000000  |
| Middle Neritic        | 0         | 2.34010667 | 0.000000 | 0   | 6  | 0.000000 | 0.000000  |
| Outer Neritic         | 2.17344   | 2.34010667 | 0.928778 | 1   | 5  | 0.200000 | 18.575564 |
| Upper Bathyal         | 0.1666667 | 2.34010667 | 0.071222 | 1   | 6  | 0.166667 | 1.187030  |
| Lower Bathyal         | 0         | 2.34010667 | 0.000000 | 0   | 9  | 0.000000 | 0.000000  |

2.3401067

100 *Hoeglundina elegans*

| Environment           | Nij       | Ni         | Aij      | Mij | Mi | Bij      | IV ij     |
|-----------------------|-----------|------------|----------|-----|----|----------|-----------|
| Transitional          | 0         | 1206.29659 | 0.000000 | 0   | 2  | 0.000000 | 0.000000  |
| Inner Neritic (Fine S | 0         | 1206.29659 | 0.000000 | 0   | 1  | 0.000000 | 0.000000  |
| Inner Neritic (Silt)  | 0         | 1206.29659 | 0.000000 | 0   | 6  | 0.000000 | 0.000000  |
| Middle Neritic        | 0         | 1206.29659 | 0.000000 | 0   | 6  | 0.000000 | 0.000000  |
| Outer Neritic         | 6.52032   | 1206.29659 | 0.005405 | 1   | 5  | 0.200000 | 0.108105  |
| Upper Bathyal         | 853.62347 | 1206.29659 | 0.707640 | 2   | 6  | 0.333333 | 23.587993 |
| Lower Bathyal         | 346.1528  | 1206.29659 | 0.286955 | 5   | 9  | 0.555556 | 15.941943 |

1206.2966

101 *Planularia sp.*

| Environment           | Nij       | Ni         | Aij      | Mij | Mi | Bij      | IV ij    |
|-----------------------|-----------|------------|----------|-----|----|----------|----------|
| Transitional          | 0         | 144.492373 | 0.000000 | 0   | 2  | 0.000000 | 0.000000 |
| Inner Neritic (Fine S | 0         | 144.492373 | 0.000000 | 0   | 1  | 0.000000 | 0.000000 |
| Inner Neritic (Silt)  | 0         | 144.492373 | 0.000000 | 0   | 6  | 0.000000 | 0.000000 |
| Middle Neritic        | 0         | 144.492373 | 0.000000 | 0   | 6  | 0.000000 | 0.000000 |
| Outer Neritic         | 2.17344   | 144.492373 | 0.015042 | 1   | 5  | 0.200000 | 0.300838 |
| Upper Bathyal         | 85.418667 | 144.492373 | 0.591164 | 1   | 6  | 0.166667 | 9.852731 |
| Lower Bathyal         | 56.900267 | 144.492373 | 0.393794 | 1   | 9  | 0.111111 | 4.375492 |

144.49237

102 *Neouvigerina sp.*

| Environment           | Nij       | Ni         | Aij      | Mij | Mi | Bij      | IV ij     |
|-----------------------|-----------|------------|----------|-----|----|----------|-----------|
| Transitional          | 0         | 48.3412089 | 0.000000 | 0   | 2  | 0.000000 | 0.000000  |
| Inner Neritic (Fine S | 0         | 48.3412089 | 0.000000 | 0   | 1  | 0.000000 | 0.000000  |
| Inner Neritic (Silt)  | 0         | 48.3412089 | 0.000000 | 0   | 6  | 0.000000 | 0.000000  |
| Middle Neritic        | 0         | 48.3412089 | 0.000000 | 0   | 6  | 0.000000 | 0.000000  |
| Outer Neritic         | 4.60032   | 48.3412089 | 0.095164 | 2   | 5  | 0.400000 | 3.806541  |
| Upper Bathyal         | 42.8504   | 48.3412089 | 0.886416 | 2   | 6  | 0.333333 | 29.547186 |
| Lower Bathyal         | 0.8904889 | 48.3412089 | 0.018421 | 1   | 9  | 0.111111 | 0.204677  |

48.341209

103 *Dentalina communis*

| Environment           | Nij       | Ni         | Aij      | Mij | Mi | Bij      | IV ij     |
|-----------------------|-----------|------------|----------|-----|----|----------|-----------|
| Transitional          | 0         | 713.866418 | 0.000000 | 0   | 2  | 0.000000 | 0.000000  |
| Inner Neritic (Fine S | 0         | 713.866418 | 0.000000 | 0   | 1  | 0.000000 | 0.000000  |
| Inner Neritic (Silt)  | 0         | 713.866418 | 0.000000 | 0   | 6  | 0.000000 | 0.000000  |
| Middle Neritic        | 0         | 713.866418 | 0.000000 | 0   | 6  | 0.000000 | 0.000000  |
| Outer Neritic         | 2.17344   | 713.866418 | 0.003045 | 1   | 5  | 0.200000 | 0.060892  |
| Upper Bathyal         | 341.48693 | 713.866418 | 0.478363 | 3   | 6  | 0.500000 | 23.918126 |
| Lower Bathyal         | 370.20604 | 713.866418 | 0.518593 | 4   | 9  | 0.444444 | 23.048573 |

713.86642

104 *Amphicoryna separans*

| Environment           | Nij       | Ni         | Aij      | Mij | Mi | Bij      | IV ij     |
|-----------------------|-----------|------------|----------|-----|----|----------|-----------|
| Transitional          | 0         | 59.3427733 | 0.000000 | 0   | 2  | 0.000000 | 0.000000  |
| Inner Neritic (Fine S | 0         | 59.3427733 | 0.000000 | 0   | 1  | 0.000000 | 0.000000  |
| Inner Neritic (Silt)  | 0         | 59.3427733 | 0.000000 | 0   | 6  | 0.000000 | 0.000000  |
| Middle Neritic        | 0         | 59.3427733 | 0.000000 | 0   | 6  | 0.000000 | 0.000000  |
| Outer Neritic         | 2.17344   | 59.3427733 | 0.036625 | 1   | 5  | 0.200000 | 0.732504  |
| Upper Bathyal         | 0.1666667 | 59.3427733 | 0.002809 | 1   | 6  | 0.166667 | 0.046809  |
| Lower Bathyal         | 57.002667 | 59.3427733 | 0.960566 | 1   | 9  | 0.111111 | 10.672959 |

59.342773

105 *Eponides procera*

| Environment           | Nij       | Ni         | Aij      | Mij | Mi | Bij      | IV ij    |
|-----------------------|-----------|------------|----------|-----|----|----------|----------|
| Transitional          | 0         | 2.09450667 | 0.000000 | 0   | 2  | 0.000000 | 0.000000 |
| Inner Neritic (Fine S | 0         | 2.09450667 | 0.000000 | 0   | 1  | 0.000000 | 0.000000 |
| Inner Neritic (Silt)  | 0         | 2.09450667 | 0.000000 | 0   | 6  | 0.000000 | 0.000000 |
| Middle Neritic        | 0         | 2.09450667 | 0.000000 | 0   | 6  | 0.000000 | 0.000000 |
| Outer Neritic         | 0.25344   | 2.09450667 | 0.121002 | 1   | 5  | 0.200000 | 2.420045 |
| Upper Bathyal         | 0         | 2.09450667 | 0.000000 | 0   | 6  | 0.000000 | 0.000000 |
| Lower Bathyal         | 1.8410667 | 2.09450667 | 0.878998 | 1   | 9  | 0.111111 | 9.766642 |

2.0945067

106 *Lenticulina peregrina*

| Environment            | Nij       | Ni        | Aij      | Mij | Mi | Bij      | IV ij     |
|------------------------|-----------|-----------|----------|-----|----|----------|-----------|
| Transitional           | 0         | 227.86432 | 0.000000 | 0   | 2  | 0.000000 | 0.000000  |
| Inner Neritic (Fine S) | 0         | 227.86432 | 0.000000 | 0   | 1  | 0.000000 | 0.000000  |
| Inner Neritic (Silt)   | 0         | 227.86432 | 0.000000 | 0   | 6  | 0.000000 | 0.000000  |
| Middle Neritic         | 0         | 227.86432 | 0.000000 | 0   | 6  | 0.000000 | 0.000000  |
| Outer Neritic          | 0.12672   | 227.86432 | 0.000556 | 1   | 5  | 0.200000 | 0.011122  |
| Upper Bathyal          | 170.73493 | 227.86432 | 0.749283 | 1   | 6  | 0.166667 | 12.488055 |
| Lower Bathyal          | 57.002667 | 227.86432 | 0.250161 | 1   | 9  | 0.111111 | 2.779562  |
|                        | 227.86432 |           |          |     |    |          |           |

107 *Nonion subturgidum*

| Environment            | Nij     | Ni      | Aij      | Mij | Mi | Bij      | IV ij     |
|------------------------|---------|---------|----------|-----|----|----------|-----------|
| Transitional           | 0       | 0.38016 | 0.000000 | 0   | 2  | 0.000000 | 0.000000  |
| Inner Neritic (Fine S) | 0       | 0.38016 | 0.000000 | 0   | 1  | 0.000000 | 0.000000  |
| Inner Neritic (Silt)   | 0       | 0.38016 | 0.000000 | 0   | 6  | 0.000000 | 0.000000  |
| Middle Neritic         | 0       | 0.38016 | 0.000000 | 0   | 6  | 0.000000 | 0.000000  |
| Outer Neritic          | 0.38016 | 0.38016 | 1.000000 | 1   | 5  | 0.200000 | 20.000000 |
| Upper Bathyal          | 0       | 0.38016 | 0.000000 | 0   | 6  | 0.000000 | 0.000000  |
| Lower Bathyal          | 0       | 0.38016 | 0.000000 | 0   | 9  | 0.000000 | 0.000000  |
|                        | 0.38016 |         |          |     |    |          |           |

108 *Vaginulina* sp.[illegible]109 *Cassidulina laevigata*[illegible]110 *Nodosaria radicula*

| Environment            | Nij       | Ni         | Aij      | Mij | Mi | Bij      | IV ij     |
|------------------------|-----------|------------|----------|-----|----|----------|-----------|
| Transitional           | 0         | 114.000533 | 0.000000 | 0   | 2  | 0.000000 | 0.000000  |
| Inner Neritic (Fine S) | 0         | 114.000533 | 0.000000 | 0   | 1  | 0.000000 | 0.000000  |
| Inner Neritic (Silt)   | 0         | 114.000533 | 0.000000 | 0   | 6  | 0.000000 | 0.000000  |
| Middle Neritic         | 0         | 114.000533 | 0.000000 | 0   | 6  | 0.000000 | 0.000000  |
| Outer Neritic          | 0.2       | 114.000533 | 0.001754 | 1   | 5  | 0.200000 | 0.035088  |
| Upper Bathyal          | 0         | 114.000533 | 0.000000 | 0   | 6  | 0.000000 | 0.000000  |
| Lower Bathyal          | 113.80053 | 114.000533 | 0.998246 | 1   | 9  | 0.111111 | 11.091618 |
|                        | 114.00053 |            |          |     |    |          |           |

111 *Uvigerina peregrina*

| Environment            | Nij       | Ni         | Aij      | Mij | Mi | Bij      | IV ij     |
|------------------------|-----------|------------|----------|-----|----|----------|-----------|
| Transitional           | 0         | 2076.88933 | 0.000000 | 0   | 2  | 0.000000 | 0.000000  |
| Inner Neritic (Fine S) | 0         | 2076.88933 | 0.000000 | 0   | 1  | 0.000000 | 0.000000  |
| Inner Neritic (Silt)   | 0         | 2076.88933 | 0.000000 | 0   | 6  | 0.000000 | 0.000000  |
| Middle Neritic         | 0         | 2076.88933 | 0.000000 | 0   | 6  | 0.000000 | 0.000000  |
| Outer Neritic          | 0.2       | 2076.88933 | 0.000096 | 1   | 5  | 0.200000 | 0.001926  |
| Upper Bathyal          | 939.1576  | 2076.88933 | 0.452194 | 4   | 6  | 0.666667 | 30.146289 |
| Lower Bathyal          | 1137.5317 | 2076.88933 | 0.547709 | 6   | 9  | 0.666667 | 36.513958 |
|                        |           | 2076.8893  |          |     |    |          |           |

112 *Siphogenerina* sp.

| Environment            | N <sub>ij</sub> | N <sub>i</sub> | A <sub>ij</sub> | M <sub>ij</sub> | M <sub>i</sub> | B <sub>ij</sub> | IV <sub>ij</sub> |
|------------------------|-----------------|----------------|-----------------|-----------------|----------------|-----------------|------------------|
| Transitional           | 0               | 0.2            | 0.000000        | 0               | 2              | 0.000000        | 0.000000         |
| Inner Neritic (Fine S) | 0               | 0.2            | 0.000000        | 0               | 1              | 0.000000        | 0.000000         |
| Inner Neritic (Silt)   | 0               | 0.2            | 0.000000        | 0               | 6              | 0.000000        | 0.000000         |
| Middle Neritic         | 0               | 0.2            | 0.000000        | 0               | 6              | 0.000000        | 0.000000         |
| Outer Neritic          | 0.2             | 0.2            | 1.000000        | 1               | 5              | 0.200000        | 20.000000        |
| Upper Bathyal          | 0               | 0.2            | 0.000000        | 0               | 6              | 0.000000        | 0.000000         |
| Lower Bathyal          | 0               | 0.2            | 0.000000        | 0               | 9              | 0.000000        | 0.000000         |

113 *Uvigerina schwageri*

| Environment            | Nij       | Ni        | Aij      | Mij | Mi | Bij      | IV ij    |
|------------------------|-----------|-----------|----------|-----|----|----------|----------|
| Transitional           | 0         | 209.62928 | 0.000000 | 0   | 2  | 0.000000 | 0.000000 |
| Inner Neritic (Fine S) | 0         | 209.62928 | 0.000000 | 0   | 1  | 0.000000 | 0.000000 |
| Inner Neritic (Silt)   | 0         | 209.62928 | 0.000000 | 0   | 6  | 0.000000 | 0.000000 |
| Middle Neritic         | 0         | 209.62928 | 0.000000 | 0   | 6  | 0.000000 | 0.000000 |
| Outer Neritic          | 95.66208  | 209.62928 | 0.456339 | 1   | 5  | 0.200000 | 9.126786 |
| Upper Bathyal          | 0.1666667 | 209.62928 | 0.000795 | 1   | 6  | 0.166667 | 0.013251 |
| Lower Bathyal          | 113.80053 | 209.62928 | 0.542866 | 1   | 9  | 0.111111 | 6.031840 |
|                        | 209.62928 |           |          |     |    |          |          |

114 *Pullenia subcarinata*

| Environment            | Nij       | Ni         | Aij      | Mij | Mi | Bij      | IV ij     |
|------------------------|-----------|------------|----------|-----|----|----------|-----------|
| Transitional           | 0         | 173.997244 | 0.000000 | 0   | 2  | 0.000000 | 0.000000  |
| Inner Neritic (Fine S) | 0         | 173.997244 | 0.000000 | 0   | 1  | 0.000000 | 0.000000  |
| Inner Neritic (Silt)   | 0         | 173.997244 | 0.000000 | 0   | 6  | 0.000000 | 0.000000  |
| Middle Neritic         | 0         | 173.997244 | 0.000000 | 0   | 6  | 0.000000 | 0.000000  |
| Outer Neritic          | 0         | 173.997244 | 0.000000 | 0   | 5  | 0.000000 | 0.000000  |
| Upper Bathyal          | 170.86747 | 173.997244 | 0.982012 | 2   | 6  | 0.333333 | 32.733750 |
| Lower Bathyal          | 3.1297778 | 173.997244 | 0.017988 | 3   | 9  | 0.333333 | 0.599584  |

115 *Lingulina galapagoensis*

| Environment            | Nij       | Ni         | Aij      | Mij | Mi | Bij      | IV ij     |
|------------------------|-----------|------------|----------|-----|----|----------|-----------|
| Transitional           | 0         | 0.16666667 | 0.000000 | 0   | 2  | 0.000000 | 0.000000  |
| Inner Neritic (Fine S) | 0         | 0.16666667 | 0.000000 | 0   | 1  | 0.000000 | 0.000000  |
| Inner Neritic (Silt)   | 0         | 0.16666667 | 0.000000 | 0   | 6  | 0.000000 | 0.000000  |
| Middle Neritic         | 0         | 0.16666667 | 0.000000 | 0   | 6  | 0.000000 | 0.000000  |
| Outer Neritic          | 0         | 0.16666667 | 0.000000 | 0   | 5  | 0.000000 | 0.000000  |
| Upper Bathyal          | 0.1666667 | 0.16666667 | 1.000000 | 1   | 6  | 0.166667 | 16.666667 |
| Lower Bathyal          | 0         | 0.16666667 | 0.000000 | 0   | 9  | 0.000000 | 0.000000  |

116 *Eponides sp.*

| Environment           | Nij       | Ni         | Aij      | Mij | Mi | Bij      | IV ij     |
|-----------------------|-----------|------------|----------|-----|----|----------|-----------|
| Transitional          | 0         | 341.819467 | 0.000000 | 0   | 2  | 0.000000 | 0.000000  |
| Inner Neritic (Fine S | 0         | 341.819467 | 0.000000 | 0   | 1  | 0.000000 | 0.000000  |
| Inner Neritic (Silt)  | 0         | 341.819467 | 0.000000 | 0   | 6  | 0.000000 | 0.000000  |
| Middle Neritic        | 0         | 341.819467 | 0.000000 | 0   | 6  | 0.000000 | 0.000000  |
| Outer Neritic         | 0.2       | 341.819467 | 0.000585 | 1   | 5  | 0.200000 | 0.011702  |
| Upper Bathyal         | 341.61947 | 341.819467 | 0.999415 | 3   | 6  | 0.500000 | 49.970745 |
| Lower Bathyal         | 0         | 341.819467 | 0.000000 | 0   | 9  | 0.000000 | 0.000000  |

341.81947

117 *Dentalina sp.*

| Environment           | Nij       | Ni       | Aij      | Mij | Mi | Bij      | IV ij     |
|-----------------------|-----------|----------|----------|-----|----|----------|-----------|
| Transitional          | 0         | 498.3256 | 0.000000 | 0   | 2  | 0.000000 | 0.000000  |
| Inner Neritic (Fine S | 0         | 498.3256 | 0.000000 | 0   | 1  | 0.000000 | 0.000000  |
| Inner Neritic (Silt)  | 0         | 498.3256 | 0.000000 | 0   | 6  | 0.000000 | 0.000000  |
| Middle Neritic        | 0         | 498.3256 | 0.000000 | 0   | 6  | 0.000000 | 0.000000  |
| Outer Neritic         | 0         | 498.3256 | 0.000000 | 0   | 5  | 0.000000 | 0.000000  |
| Upper Bathyal         | 384.32027 | 498.3256 | 0.771223 | 3   | 6  | 0.500000 | 38.561160 |
| Lower Bathyal         | 114.00533 | 498.3256 | 0.228777 | 1   | 9  | 0.111111 | 2.541964  |

498.3256

118 *Rectobolivina bifrons*

| Environment           | Nij       | Ni       | Aij      | Mij | Mi | Bij      | IV ij     |
|-----------------------|-----------|----------|----------|-----|----|----------|-----------|
| Transitional          | 0         | 484.1432 | 0.000000 | 0   | 2  | 0.000000 | 0.000000  |
| Inner Neritic (Fine S | 0         | 484.1432 | 0.000000 | 0   | 1  | 0.000000 | 0.000000  |
| Inner Neritic (Silt)  | 0         | 484.1432 | 0.000000 | 0   | 6  | 0.000000 | 0.000000  |
| Middle Neritic        | 0         | 484.1432 | 0.000000 | 0   | 6  | 0.000000 | 0.000000  |
| Outer Neritic         | 0         | 484.1432 | 0.000000 | 0   | 5  | 0.000000 | 0.000000  |
| Upper Bathyal         | 427.14053 | 484.1432 | 0.882261 | 4   | 6  | 0.666667 | 58.817382 |
| Lower Bathyal         | 57.002667 | 484.1432 | 0.117739 | 1   | 9  | 0.111111 | 1.308214  |

484.1432

119 *Uvigerina asperula*

| Environment           | Nij       | Ni         | Aij      | Mij | Mi | Bij      | IV ij     |
|-----------------------|-----------|------------|----------|-----|----|----------|-----------|
| Transitional          | 0         | 3927.97787 | 0.000000 | 0   | 2  | 0.000000 | 0.000000  |
| Inner Neritic (Fine S | 0         | 3927.97787 | 0.000000 | 0   | 1  | 0.000000 | 0.000000  |
| Inner Neritic (Silt)  | 0         | 3927.97787 | 0.000000 | 0   | 6  | 0.000000 | 0.000000  |
| Middle Neritic        | 0         | 3927.97787 | 0.000000 | 0   | 6  | 0.000000 | 0.000000  |
| Outer Neritic         | 0         | 3927.97787 | 0.000000 | 0   | 5  | 0.000000 | 0.000000  |
| Upper Bathyal         | 3586.3715 | 3927.97787 | 0.913033 | 4   | 6  | 0.666667 | 60.868834 |
| Lower Bathyal         | 341.6064  | 3927.97787 | 0.086967 | 2   | 9  | 0.222222 | 1.932611  |

3927.9779

120 *Discorbina orbicularis*

| Environment           | Nij       | Ni         | Aij      | Mij | Mi | Bij      | IV ij     |
|-----------------------|-----------|------------|----------|-----|----|----------|-----------|
| Transitional          | 0         | 85.3674667 | 0.000000 | 0   | 2  | 0.000000 | 0.000000  |
| Inner Neritic (Fine S | 0         | 85.3674667 | 0.000000 | 0   | 1  | 0.000000 | 0.000000  |
| Inner Neritic (Silt)  | 0         | 85.3674667 | 0.000000 | 0   | 6  | 0.000000 | 0.000000  |
| Middle Neritic        | 0         | 85.3674667 | 0.000000 | 0   | 6  | 0.000000 | 0.000000  |
| Outer Neritic         | 0         | 85.3674667 | 0.000000 | 0   | 5  | 0.000000 | 0.000000  |
| Upper Bathyal         | 85.367467 | 85.3674667 | 1.000000 | 1   | 6  | 0.166667 | 16.666667 |
| Lower Bathyal         | 0         | 85.3674667 | 0.000000 | 0   | 9  | 0.000000 | 0.000000  |

85.367467

121 *Globocassidulina sp.*

| Environment           | Nij       | Ni         | Aij      | Mij | Mi | Bij      | IV ij     |
|-----------------------|-----------|------------|----------|-----|----|----------|-----------|
| Transitional          | 0         | 427.242222 | 0.000000 | 0   | 2  | 0.000000 | 0.000000  |
| Inner Neritic (Fine S | 0         | 427.242222 | 0.000000 | 0   | 1  | 0.000000 | 0.000000  |
| Inner Neritic (Silt)  | 0         | 427.242222 | 0.000000 | 0   | 6  | 0.000000 | 0.000000  |
| Middle Neritic        | 0         | 427.242222 | 0.000000 | 0   | 6  | 0.000000 | 0.000000  |
| Outer Neritic         | 0         | 427.242222 | 0.000000 | 0   | 5  | 0.000000 | 0.000000  |
| Upper Bathyal         | 256.2048  | 427.242222 | 0.599671 | 2   | 6  | 0.333333 | 19.989036 |
| Lower Bathyal         | 171.03742 | 427.242222 | 0.400329 | 3   | 9  | 0.333333 | 13.344298 |

427.24222

122 *Planularia gemmata*

| Environment           | Nij       | Ni         | Aij      | Mij | Mi | Bij      | IV ij     |
|-----------------------|-----------|------------|----------|-----|----|----------|-----------|
| Transitional          | 0         | 85.3674667 | 0.000000 | 0   | 2  | 0.000000 | 0.000000  |
| Inner Neritic (Fine S | 0         | 85.3674667 | 0.000000 | 0   | 1  | 0.000000 | 0.000000  |
| Inner Neritic (Silt)  | 0         | 85.3674667 | 0.000000 | 0   | 6  | 0.000000 | 0.000000  |
| Middle Neritic        | 0         | 85.3674667 | 0.000000 | 0   | 6  | 0.000000 | 0.000000  |
| Outer Neritic         | 0         | 85.3674667 | 0.000000 | 0   | 5  | 0.000000 | 0.000000  |
| Upper Bathyal         | 85.367467 | 85.3674667 | 1.000000 | 1   | 6  | 0.166667 | 16.666667 |
| Lower Bathyal         | 0         | 85.3674667 | 0.000000 | 0   | 9  | 0.000000 | 0.000000  |

85.367467

123 *Hemirobulina galapagoensis*

| Environment           | Nij       | Ni         | Aij      | Mij | Mi | Bij      | IV ij     |
|-----------------------|-----------|------------|----------|-----|----|----------|-----------|
| Transitional          | 0         | 85.3674667 | 0.000000 | 0   | 2  | 0.000000 | 0.000000  |
| Inner Neritic (Fine S | 0         | 85.3674667 | 0.000000 | 0   | 1  | 0.000000 | 0.000000  |
| Inner Neritic (Silt)  | 0         | 85.3674667 | 0.000000 | 0   | 6  | 0.000000 | 0.000000  |
| Middle Neritic        | 0         | 85.3674667 | 0.000000 | 0   | 6  | 0.000000 | 0.000000  |
| Outer Neritic         | 0         | 85.3674667 | 0.000000 | 0   | 5  | 0.000000 | 0.000000  |
| Upper Bathyal         | 85.367467 | 85.3674667 | 1.000000 | 1   | 6  | 0.166667 | 16.666667 |
| Lower Bathyal         | 0         | 85.3674667 | 0.000000 | 0   | 9  | 0.000000 | 0.000000  |

85.367467

124 *Siphogenerina dimorpha*

| Environment           | Nij       | Ni         | Aij      | Mij | Mi | Bij      | IV ij     |
|-----------------------|-----------|------------|----------|-----|----|----------|-----------|
| Transitional          | 0         | 370.158933 | 0.000000 | 0   | 2  | 0.000000 | 0.000000  |
| Inner Neritic (Fine S | 0         | 370.158933 | 0.000000 | 0   | 1  | 0.000000 | 0.000000  |
| Inner Neritic (Silt)  | 0         | 370.158933 | 0.000000 | 0   | 6  | 0.000000 | 0.000000  |
| Middle Neritic        | 0         | 370.158933 | 0.000000 | 0   | 6  | 0.000000 | 0.000000  |
| Outer Neritic         | 0         | 370.158933 | 0.000000 | 0   | 5  | 0.000000 | 0.000000  |
| Upper Bathyal         | 256.1536  | 370.158933 | 0.692010 | 2   | 6  | 0.333333 | 23.066992 |
| Lower Bathyal         | 114.00533 | 370.158933 | 0.307990 | 1   | 9  | 0.111111 | 3.422114  |

370.15893

125 *Siphogenerina collumelaris*

| Environment           | Nij      | Ni       | Aij      | Mij | Mi | Bij      | IV ij     |
|-----------------------|----------|----------|----------|-----|----|----------|-----------|
| Transitional          | 0        | 256.1024 | 0.000000 | 0   | 2  | 0.000000 | 0.000000  |
| Inner Neritic (Fine S | 0        | 256.1024 | 0.000000 | 0   | 1  | 0.000000 | 0.000000  |
| Inner Neritic (Silt)  | 0        | 256.1024 | 0.000000 | 0   | 6  | 0.000000 | 0.000000  |
| Middle Neritic        | 0        | 256.1024 | 0.000000 | 0   | 6  | 0.000000 | 0.000000  |
| Outer Neritic         | 0        | 256.1024 | 0.000000 | 0   | 5  | 0.000000 | 0.000000  |
| Upper Bathyal         | 256.1024 | 256.1024 | 1.000000 | 1   | 6  | 0.166667 | 16.666667 |
| Lower Bathyal         | 0        | 256.1024 | 0.000000 | 0   | 9  | 0.000000 | 0.000000  |

256.1024

126 *Siphonina sp.*

| Environment           | Nij       | Ni         | Aij      | Mij | Mi | Bij      | IV ij     |
|-----------------------|-----------|------------|----------|-----|----|----------|-----------|
| Transitional          | 0         | 85.3674667 | 0.000000 | 0   | 2  | 0.000000 | 0.000000  |
| Inner Neritic (Fine S | 0         | 85.3674667 | 0.000000 | 0   | 1  | 0.000000 | 0.000000  |
| Inner Neritic (Silt)  | 0         | 85.3674667 | 0.000000 | 0   | 6  | 0.000000 | 0.000000  |
| Middle Neritic        | 0         | 85.3674667 | 0.000000 | 0   | 6  | 0.000000 | 0.000000  |
| Outer Neritic         | 0         | 85.3674667 | 0.000000 | 0   | 5  | 0.000000 | 0.000000  |
| Upper Bathyal         | 85.367467 | 85.3674667 | 1.000000 | 1   | 6  | 0.166667 | 16.666667 |
| Lower Bathyal         | 0         | 85.3674667 | 0.000000 | 0   | 9  | 0.000000 | 0.000000  |

85.367467

127 *Sigmoilopsis schlumbergeri*

| Environment           | Nij      | Ni       | Aij      | Mij | Mi | Bij      | IV ij     |
|-----------------------|----------|----------|----------|-----|----|----------|-----------|
| Transitional          | 0        | 256.1536 | 0.000000 | 0   | 2  | 0.000000 | 0.000000  |
| Inner Neritic (Fine S | 0        | 256.1536 | 0.000000 | 0   | 1  | 0.000000 | 0.000000  |
| Inner Neritic (Silt)  | 0        | 256.1536 | 0.000000 | 0   | 6  | 0.000000 | 0.000000  |
| Middle Neritic        | 0        | 256.1536 | 0.000000 | 0   | 6  | 0.000000 | 0.000000  |
| Outer Neritic         | 0        | 256.1536 | 0.000000 | 0   | 5  | 0.000000 | 0.000000  |
| Upper Bathyal         | 256.1536 | 256.1536 | 1.000000 | 2   | 6  | 0.333333 | 33.333333 |
| Lower Bathyal         | 0        | 256.1536 | 0.000000 | 0   | 9  | 0.000000 | 0.000000  |

256.1536

128 *Bolivinita subangularis*

| Environment           | Nij       | Ni         | Aij      | Mij | Mi | Bij      | IV ij     |
|-----------------------|-----------|------------|----------|-----|----|----------|-----------|
| Transitional          | 0         | 427.093333 | 0.000000 | 0   | 2  | 0.000000 | 0.000000  |
| Inner Neritic (Fine S | 0         | 427.093333 | 0.000000 | 0   | 1  | 0.000000 | 0.000000  |
| Inner Neritic (Silt)  | 0         | 427.093333 | 0.000000 | 0   | 6  | 0.000000 | 0.000000  |
| Middle Neritic        | 0         | 427.093333 | 0.000000 | 0   | 6  | 0.000000 | 0.000000  |
| Outer Neritic         | 0         | 427.093333 | 0.000000 | 0   | 5  | 0.000000 | 0.000000  |
| Upper Bathyal         | 427.09333 | 427.093333 | 1.000000 | 1   | 6  | 0.166667 | 16.666667 |
| Lower Bathyal         | 0         | 427.093333 | 0.000000 | 0   | 9  | 0.000000 | 0.000000  |

427.09333

129 *Astacolus insolitus*

| Environment           | Nij       | Ni         | Aij      | Mij | Mi | Bij      | IV ij     |
|-----------------------|-----------|------------|----------|-----|----|----------|-----------|
| Transitional          | 0         | 85.4186667 | 0.000000 | 0   | 2  | 0.000000 | 0.000000  |
| Inner Neritic (Fine S | 0         | 85.4186667 | 0.000000 | 0   | 1  | 0.000000 | 0.000000  |
| Inner Neritic (Silt)  | 0         | 85.4186667 | 0.000000 | 0   | 6  | 0.000000 | 0.000000  |
| Middle Neritic        | 0         | 85.4186667 | 0.000000 | 0   | 6  | 0.000000 | 0.000000  |
| Outer Neritic         | 0         | 85.4186667 | 0.000000 | 0   | 5  | 0.000000 | 0.000000  |
| Upper Bathyal         | 85.418667 | 85.4186667 | 1.000000 | 1   | 6  | 0.166667 | 16.666667 |
| Lower Bathyal         | 0         | 85.4186667 | 0.000000 | 0   | 9  | 0.000000 | 0.000000  |

85.418667

130 *Bolivina hantkeniana*

| Environment           | Nij       | Ni         | Aij      | Mij | Mi | Bij      | IV ij     |
|-----------------------|-----------|------------|----------|-----|----|----------|-----------|
| Transitional          | 0         | 85.4186667 | 0.000000 | 0   | 2  | 0.000000 | 0.000000  |
| Inner Neritic (Fine S | 0         | 85.4186667 | 0.000000 | 0   | 1  | 0.000000 | 0.000000  |
| Inner Neritic (Silt)  | 0         | 85.4186667 | 0.000000 | 0   | 6  | 0.000000 | 0.000000  |
| Middle Neritic        | 0         | 85.4186667 | 0.000000 | 0   | 6  | 0.000000 | 0.000000  |
| Outer Neritic         | 0         | 85.4186667 | 0.000000 | 0   | 5  | 0.000000 | 0.000000  |
| Upper Bathyal         | 85.418667 | 85.4186667 | 1.000000 | 1   | 6  | 0.166667 | 16.666667 |
| Lower Bathyal         | 0         | 85.4186667 | 0.000000 | 0   | 9  | 0.000000 | 0.000000  |

85.418667



131 *Bigenerina nodosaria*

| Environment           | Nij       | Ni         | Aij      | Mij | Mi | Bij      | IV ij     |
|-----------------------|-----------|------------|----------|-----|----|----------|-----------|
| Transitional          | 0         | 85.4186667 | 0.000000 | 0   | 2  | 0.000000 | 0.000000  |
| Inner Neritic (Fine S | 0         | 85.4186667 | 0.000000 | 0   | 1  | 0.000000 | 0.000000  |
| Inner Neritic (Silt)  | 0         | 85.4186667 | 0.000000 | 0   | 6  | 0.000000 | 0.000000  |
| Middle Neritic        | 0         | 85.4186667 | 0.000000 | 0   | 6  | 0.000000 | 0.000000  |
| Outer Neritic         | 0         | 85.4186667 | 0.000000 | 0   | 5  | 0.000000 | 0.000000  |
| Upper Bathyal         | 85.418667 | 85.4186667 | 1.000000 | 1   | 6  | 0.166667 | 16.666667 |
| Lower Bathyal         | 0         | 85.4186667 | 0.000000 | 0   | 9  | 0.000000 | 0.000000  |

85.418667

132 *Oridorsalis umbonatus*

| Environment           | Nij       | Ni         | Aij      | Mij | Mi | Bij      | IV ij     |
|-----------------------|-----------|------------|----------|-----|----|----------|-----------|
| Transitional          | 0         | 428.095911 | 0.000000 | 0   | 2  | 0.000000 | 0.000000  |
| Inner Neritic (Fine S | 0         | 428.095911 | 0.000000 | 0   | 1  | 0.000000 | 0.000000  |
| Inner Neritic (Silt)  | 0         | 428.095911 | 0.000000 | 0   | 6  | 0.000000 | 0.000000  |
| Middle Neritic        | 0         | 428.095911 | 0.000000 | 0   | 6  | 0.000000 | 0.000000  |
| Outer Neritic         | 0         | 428.095911 | 0.000000 | 0   | 5  | 0.000000 | 0.000000  |
| Upper Bathyal         | 256.0512  | 428.095911 | 0.598116 | 1   | 6  | 0.166667 | 9.968607  |
| Lower Bathyal         | 172.04471 | 428.095911 | 0.401884 | 4   | 9  | 0.444444 | 17.861492 |

428.09591

133 *Ammonia supera*

| Environment           | Nij       | Ni         | Aij      | Mij | Mi | Bij      | IV ij     |
|-----------------------|-----------|------------|----------|-----|----|----------|-----------|
| Transitional          | 0         | 352.085333 | 0.000000 | 0   | 2  | 0.000000 | 0.000000  |
| Inner Neritic (Fine S | 0         | 352.085333 | 0.000000 | 0   | 1  | 0.000000 | 0.000000  |
| Inner Neritic (Silt)  | 0         | 352.085333 | 0.000000 | 0   | 6  | 0.000000 | 0.000000  |
| Middle Neritic        | 0         | 352.085333 | 0.000000 | 0   | 6  | 0.000000 | 0.000000  |
| Outer Neritic         | 0         | 352.085333 | 0.000000 | 0   | 5  | 0.000000 | 0.000000  |
| Upper Bathyal         | 352.08533 | 352.085333 | 1.000000 | 2   | 6  | 0.333333 | 33.333333 |
| Lower Bathyal         | 0         | 352.085333 | 0.000000 | 0   | 9  | 0.000000 | 0.000000  |

352.08533

134 *Globobulimina notovata*

| Environment           | Nij       | Ni         | Aij      | Mij | Mi | Bij      | IV ij     |
|-----------------------|-----------|------------|----------|-----|----|----------|-----------|
| Transitional          | 0         | 256.578489 | 0.000000 | 0   | 2  | 0.000000 | 0.000000  |
| Inner Neritic (Fine S | 0         | 256.578489 | 0.000000 | 0   | 1  | 0.000000 | 0.000000  |
| Inner Neritic (Silt)  | 0         | 256.578489 | 0.000000 | 0   | 6  | 0.000000 | 0.000000  |
| Middle Neritic        | 0         | 256.578489 | 0.000000 | 0   | 6  | 0.000000 | 0.000000  |
| Outer Neritic         | 0         | 256.578489 | 0.000000 | 0   | 5  | 0.000000 | 0.000000  |
| Upper Bathyal         | 170.7008  | 256.578489 | 0.665297 | 1   | 6  | 0.166667 | 11.088277 |
| Lower Bathyal         | 85.877689 | 256.578489 | 0.334703 | 2   | 9  | 0.222222 | 7.437853  |

256.57849

135 *Planulina ariminensis*

| Environment           | Nij       | Ni         | Aij      | Mij | Mi | Bij      | IV ij     |
|-----------------------|-----------|------------|----------|-----|----|----------|-----------|
| Transitional          | 0         | 366.728533 | 0.000000 | 0   | 2  | 0.000000 | 0.000000  |
| Inner Neritic (Fine S | 0         | 366.728533 | 0.000000 | 0   | 1  | 0.000000 | 0.000000  |
| Inner Neritic (Silt)  | 0         | 366.728533 | 0.000000 | 0   | 6  | 0.000000 | 0.000000  |
| Middle Neritic        | 0         | 366.728533 | 0.000000 | 0   | 6  | 0.000000 | 0.000000  |
| Outer Neritic         | 0         | 366.728533 | 0.000000 | 0   | 5  | 0.000000 | 0.000000  |
| Upper Bathyal         | 138.71787 | 366.728533 | 0.378258 | 3   | 6  | 0.500000 | 18.912882 |
| Lower Bathyal         | 228.01067 | 366.728533 | 0.621742 | 1   | 9  | 0.111111 | 6.908249  |

366.72853

136 *Pyrgo lucernula*

| Environment           | Nij     | Ni      | Aij      | Mij | Mi | Bij      | IV ij     |
|-----------------------|---------|---------|----------|-----|----|----------|-----------|
| Transitional          | 0       | 85.3504 | 0.000000 | 0   | 2  | 0.000000 | 0.000000  |
| Inner Neritic (Fine S | 0       | 85.3504 | 0.000000 | 0   | 1  | 0.000000 | 0.000000  |
| Inner Neritic (Silt)  | 0       | 85.3504 | 0.000000 | 0   | 6  | 0.000000 | 0.000000  |
| Middle Neritic        | 0       | 85.3504 | 0.000000 | 0   | 6  | 0.000000 | 0.000000  |
| Outer Neritic         | 0       | 85.3504 | 0.000000 | 0   | 5  | 0.000000 | 0.000000  |
| Upper Bathyal         | 85.3504 | 85.3504 | 1.000000 | 1   | 6  | 0.166667 | 16.666667 |
| Lower Bathyal         | 0       | 85.3504 | 0.000000 | 0   | 9  | 0.000000 | 0.000000  |

85.3504

137 *Globobulimina pacifica*

| Environment           | Nij       | Ni         | Aij      | Mij | Mi | Bij      | IV ij     |
|-----------------------|-----------|------------|----------|-----|----|----------|-----------|
| Transitional          | 0         | 260.166311 | 0.000000 | 0   | 2  | 0.000000 | 0.000000  |
| Inner Neritic (Fine S | 0         | 260.166311 | 0.000000 | 0   | 1  | 0.000000 | 0.000000  |
| Inner Neritic (Silt)  | 0         | 260.166311 | 0.000000 | 0   | 6  | 0.000000 | 0.000000  |
| Middle Neritic        | 0         | 260.166311 | 0.000000 | 0   | 6  | 0.000000 | 0.000000  |
| Outer Neritic         | 0         | 260.166311 | 0.000000 | 0   | 5  | 0.000000 | 0.000000  |
| Upper Bathyal         | 85.367467 | 260.166311 | 0.328127 | 1   | 6  | 0.166667 | 5.468775  |
| Lower Bathyal         | 174.79884 | 260.166311 | 0.671873 | 4   | 9  | 0.444444 | 29.861043 |

260.16631

138 *Ceratobulimina contraria*

| Environment           | Nij       | Ni         | Aij      | Mij | Mi | Bij      | IV ij     |
|-----------------------|-----------|------------|----------|-----|----|----------|-----------|
| Transitional          | 0         | 298.769067 | 0.000000 | 0   | 2  | 0.000000 | 0.000000  |
| Inner Neritic (Fine S | 0         | 298.769067 | 0.000000 | 0   | 1  | 0.000000 | 0.000000  |
| Inner Neritic (Silt)  | 0         | 298.769067 | 0.000000 | 0   | 6  | 0.000000 | 0.000000  |
| Middle Neritic        | 0         | 298.769067 | 0.000000 | 0   | 6  | 0.000000 | 0.000000  |
| Outer Neritic         | 0         | 298.769067 | 0.000000 | 0   | 5  | 0.000000 | 0.000000  |
| Upper Bathyal         | 213.41867 | 298.769067 | 0.714327 | 1   | 6  | 0.166667 | 11.905442 |
| Lower Bathyal         | 85.3504   | 298.769067 | 0.285673 | 1   | 9  | 0.111111 | 3.174150  |

298.76907

139 *Amphicoryna sp.*

| Environment           | Nij       | Ni        | Aij      | Mij | Mi | Bij      | IV ij     |
|-----------------------|-----------|-----------|----------|-----|----|----------|-----------|
| Transitional          | 0         | 57.002667 | 0.000000 | 0   | 2  | 0.000000 | 0.000000  |
| Inner Neritic (Fine S | 0         | 57.002667 | 0.000000 | 0   | 1  | 0.000000 | 0.000000  |
| Inner Neritic (Silt)  | 0         | 57.002667 | 0.000000 | 0   | 6  | 0.000000 | 0.000000  |
| Middle Neritic        | 0         | 57.002667 | 0.000000 | 0   | 6  | 0.000000 | 0.000000  |
| Outer Neritic         | 0         | 57.002667 | 0.000000 | 0   | 5  | 0.000000 | 0.000000  |
| Upper Bathyal         | 0         | 57.002667 | 0.000000 | 0   | 6  | 0.000000 | 0.000000  |
| Lower Bathyal         | 57.002667 | 57.002667 | 1.000000 | 1   | 9  | 0.111111 | 11.111111 |

57.002667

140 *Lagena hispidula*

| Environment           | Nij       | Ni         | Aij      | Mij | Mi | Bij      | IV ij     |
|-----------------------|-----------|------------|----------|-----|----|----------|-----------|
| Transitional          | 0         | 57.6854222 | 0.000000 | 0   | 2  | 0.000000 | 0.000000  |
| Inner Neritic (Fine S | 0         | 57.6854222 | 0.000000 | 0   | 1  | 0.000000 | 0.000000  |
| Inner Neritic (Silt)  | 0         | 57.6854222 | 0.000000 | 0   | 6  | 0.000000 | 0.000000  |
| Middle Neritic        | 0         | 57.6854222 | 0.000000 | 0   | 6  | 0.000000 | 0.000000  |
| Outer Neritic         | 0         | 57.6854222 | 0.000000 | 0   | 5  | 0.000000 | 0.000000  |
| Upper Bathyal         | 0         | 57.6854222 | 0.000000 | 0   | 6  | 0.000000 | 0.000000  |
| Lower Bathyal         | 57.685422 | 57.6854222 | 1.000000 | 3   | 9  | 0.333333 | 33.333333 |

57.685422

141 *Marginulina obesa*

| Environment           | Nij       | Ni         | Aij      | Mij | Mi | Bij      | IV ij     |
|-----------------------|-----------|------------|----------|-----|----|----------|-----------|
| Transitional          | 0         | 57.0026667 | 0.000000 | 0   | 2  | 0.000000 | 0.000000  |
| Inner Neritic (Fine S | 0         | 57.0026667 | 0.000000 | 0   | 1  | 0.000000 | 0.000000  |
| Inner Neritic (Silt)  | 0         | 57.0026667 | 0.000000 | 0   | 6  | 0.000000 | 0.000000  |
| Middle Neritic        | 0         | 57.0026667 | 0.000000 | 0   | 6  | 0.000000 | 0.000000  |
| Outer Neritic         | 0         | 57.0026667 | 0.000000 | 0   | 5  | 0.000000 | 0.000000  |
| Upper Bathyal         | 0         | 57.0026667 | 0.000000 | 0   | 6  | 0.000000 | 0.000000  |
| Lower Bathyal         | 57.002667 | 57.0026667 | 1.000000 | 1   | 9  | 0.111111 | 11.111111 |

57.002667

142 *Planulina sp.*

| Environment           | Nij       | Ni         | Aij      | Mij | Mi | Bij      | IV ij     |
|-----------------------|-----------|------------|----------|-----|----|----------|-----------|
| Transitional          | 0         | 33.5972444 | 0.000000 | 0   | 2  | 0.000000 | 0.000000  |
| Inner Neritic (Fine S | 0         | 33.5972444 | 0.000000 | 0   | 1  | 0.000000 | 0.000000  |
| Inner Neritic (Silt)  | 0         | 33.5972444 | 0.000000 | 0   | 6  | 0.000000 | 0.000000  |
| Middle Neritic        | 0         | 33.5972444 | 0.000000 | 0   | 6  | 0.000000 | 0.000000  |
| Outer Neritic         | 0         | 33.5972444 | 0.000000 | 0   | 5  | 0.000000 | 0.000000  |
| Upper Bathyal         | 0         | 33.5972444 | 0.000000 | 0   | 6  | 0.000000 | 0.000000  |
| Lower Bathyal         | 33.597244 | 33.5972444 | 1.000000 | 4   | 9  | 0.444444 | 44.444444 |

33.597244

143 *Ceratocancris clifdenensis*

| Environment           | Nij       | Ni         | Aij      | Mij | Mi | Bij      | IV ij     |
|-----------------------|-----------|------------|----------|-----|----|----------|-----------|
| Transitional          | 0         | 0.89048889 | 0.000000 | 0   | 2  | 0.000000 | 0.000000  |
| Inner Neritic (Fine S | 0         | 0.89048889 | 0.000000 | 0   | 1  | 0.000000 | 0.000000  |
| Inner Neritic (Silt)  | 0         | 0.89048889 | 0.000000 | 0   | 6  | 0.000000 | 0.000000  |
| Middle Neritic        | 0         | 0.89048889 | 0.000000 | 0   | 6  | 0.000000 | 0.000000  |
| Outer Neritic         | 0         | 0.89048889 | 0.000000 | 0   | 5  | 0.000000 | 0.000000  |
| Upper Bathyal         | 0         | 0.89048889 | 0.000000 | 0   | 6  | 0.000000 | 0.000000  |
| Lower Bathyal         | 0.8904889 | 0.89048889 | 1.000000 | 1   | 9  | 0.111111 | 11.111111 |

0.8904889

144 *Astacolus sp.*

| Environment           | Nij       | Ni         | Aij      | Mij | Mi | Bij      | IV ij     |
|-----------------------|-----------|------------|----------|-----|----|----------|-----------|
| Transitional          | 0         | 56.9002667 | 0.000000 | 0   | 2  | 0.000000 | 0.000000  |
| Inner Neritic (Fine S | 0         | 56.9002667 | 0.000000 | 0   | 1  | 0.000000 | 0.000000  |
| Inner Neritic (Silt)  | 0         | 56.9002667 | 0.000000 | 0   | 6  | 0.000000 | 0.000000  |
| Middle Neritic        | 0         | 56.9002667 | 0.000000 | 0   | 6  | 0.000000 | 0.000000  |
| Outer Neritic         | 0         | 56.9002667 | 0.000000 | 0   | 5  | 0.000000 | 0.000000  |
| Upper Bathyal         | 0         | 56.9002667 | 0.000000 | 0   | 6  | 0.000000 | 0.000000  |
| Lower Bathyal         | 56.900267 | 56.9002667 | 1.000000 | 1   | 9  | 0.111111 | 11.111111 |

56.900267

145 *Lenticulina iota*

| Environment           | Nij      | Ni       | Aij      | Mij | Mi | Bij      | IV ij     |
|-----------------------|----------|----------|----------|-----|----|----------|-----------|
| Transitional          | 0        | 170.7008 | 0.000000 | 0   | 2  | 0.000000 | 0.000000  |
| Inner Neritic (Fine S | 0        | 170.7008 | 0.000000 | 0   | 1  | 0.000000 | 0.000000  |
| Inner Neritic (Silt)  | 0        | 170.7008 | 0.000000 | 0   | 6  | 0.000000 | 0.000000  |
| Middle Neritic        | 0        | 170.7008 | 0.000000 | 0   | 6  | 0.000000 | 0.000000  |
| Outer Neritic         | 0        | 170.7008 | 0.000000 | 0   | 5  | 0.000000 | 0.000000  |
| Upper Bathyal         | 0        | 170.7008 | 0.000000 | 0   | 6  | 0.000000 | 0.000000  |
| Lower Bathyal         | 170.7008 | 170.7008 | 1.000000 | 1   | 9  | 0.111111 | 11.111111 |

170.7008

146 *Amphicoryna hirsuta*

| Environment            | Nij       | Ni         | Aij      | Mij | Mi | Bij      | IV ij     |
|------------------------|-----------|------------|----------|-----|----|----------|-----------|
| Transitional           | 0         | 113.800533 | 0.000000 | 0   | 2  | 0.000000 | 0.000000  |
| Inner Neritic (Fine S) | 0         | 113.800533 | 0.000000 | 0   | 1  | 0.000000 | 0.000000  |
| Inner Neritic (Silt)   | 0         | 113.800533 | 0.000000 | 0   | 6  | 0.000000 | 0.000000  |
| Middle Neritic         | 0         | 113.800533 | 0.000000 | 0   | 6  | 0.000000 | 0.000000  |
| Outer Neritic          | 0         | 113.800533 | 0.000000 | 0   | 5  | 0.000000 | 0.000000  |
| Upper Bathyal          | 0         | 113.800533 | 0.000000 | 0   | 6  | 0.000000 | 0.000000  |
| Lower Bathyal          | 113.80053 | 113.800533 | 1.000000 | 1   | 9  | 0.111111 | 11.111111 |

113.80053

147 *Laticarinina pauperata*

| Environment            | Nij       | Ni         | Aij      | Mij | Mi | Bij      | IV ij     |
|------------------------|-----------|------------|----------|-----|----|----------|-----------|
| Transitional           | 0         | 113.823289 | 0.000000 | 0   | 2  | 0.000000 | 0.000000  |
| Inner Neritic (Fine S) | 0         | 113.823289 | 0.000000 | 0   | 1  | 0.000000 | 0.000000  |
| Inner Neritic (Silt)   | 0         | 113.823289 | 0.000000 | 0   | 6  | 0.000000 | 0.000000  |
| Middle Neritic         | 0         | 113.823289 | 0.000000 | 0   | 6  | 0.000000 | 0.000000  |
| Outer Neritic          | 0         | 113.823289 | 0.000000 | 0   | 5  | 0.000000 | 0.000000  |
| Upper Bathyal          | 0         | 113.823289 | 0.000000 | 0   | 6  | 0.000000 | 0.000000  |
| Lower Bathyal          | 113.82329 | 113.823289 | 1.000000 | 1   | 9  | 0.111111 | 11.111111 |

113.82329

148 *Nodosaria flintii*

| Environment            | Nij       | Ni         | Aij      | Mij | Mi | Bij      | IV ij     |
|------------------------|-----------|------------|----------|-----|----|----------|-----------|
| Transitional           | 0         | 56.9116444 | 0.000000 | 0   | 2  | 0.000000 | 0.000000  |
| Inner Neritic (Fine S) | 0         | 56.9116444 | 0.000000 | 0   | 1  | 0.000000 | 0.000000  |
| Inner Neritic (Silt)   | 0         | 56.9116444 | 0.000000 | 0   | 6  | 0.000000 | 0.000000  |
| Middle Neritic         | 0         | 56.9116444 | 0.000000 | 0   | 6  | 0.000000 | 0.000000  |
| Outer Neritic          | 0         | 56.9116444 | 0.000000 | 0   | 5  | 0.000000 | 0.000000  |
| Upper Bathyal          | 0         | 56.9116444 | 0.000000 | 0   | 6  | 0.000000 | 0.000000  |
| Lower Bathyal          | 56.911644 | 56.9116444 | 1.000000 | 1   | 9  | 0.111111 | 11.111111 |

56.911644

149 *Planulina wuellerstorfi*

| Environment            | Nij        | Ni         | Aij      | Mij | Mi | Bij      | IV ij     |
|------------------------|------------|------------|----------|-----|----|----------|-----------|
| Transitional           | 0          | 0.66666667 | 0.000000 | 0   | 2  | 0.000000 | 0.000000  |
| Inner Neritic (Fine S) | 0          | 0.66666667 | 0.000000 | 0   | 1  | 0.000000 | 0.000000  |
| Inner Neritic (Silt)   | 0          | 0.66666667 | 0.000000 | 0   | 6  | 0.000000 | 0.000000  |
| Middle Neritic         | 0          | 0.66666667 | 0.000000 | 0   | 6  | 0.000000 | 0.000000  |
| Outer Neritic          | 0          | 0.66666667 | 0.000000 | 0   | 5  | 0.000000 | 0.000000  |
| Upper Bathyal          | 0          | 0.66666667 | 0.000000 | 0   | 6  | 0.000000 | 0.000000  |
| Lower Bathyal          | 0.66666667 | 0.66666667 | 1.000000 | 1   | 9  | 0.111111 | 11.111111 |

---

0.66666667

150 *Lagena* sp.

| Environment            | Nij       | Ni         | Aij      | Mij | Mi | Bij      | IV ij     |
|------------------------|-----------|------------|----------|-----|----|----------|-----------|
| Transitional           | 0         | 0.72391111 | 0.000000 | 0   | 2  | 0.000000 | 0.000000  |
| Inner Neritic (Fine S) | 0         | 0.72391111 | 0.000000 | 0   | 1  | 0.000000 | 0.000000  |
| Inner Neritic (Silt)   | 0         | 0.72391111 | 0.000000 | 0   | 6  | 0.000000 | 0.000000  |
| Middle Neritic         | 0         | 0.72391111 | 0.000000 | 0   | 6  | 0.000000 | 0.000000  |
| Outer Neritic          | 0         | 0.72391111 | 0.000000 | 0   | 5  | 0.000000 | 0.000000  |
| Upper Bathyal          | 0         | 0.72391111 | 0.000000 | 0   | 6  | 0.000000 | 0.000000  |
| Lower Bathyal          | 0.7239111 | 0.72391111 | 1.000000 | 2   | 9  | 0.222222 | 22.222222 |

---

0.7239111

151 *Bulimina aculeata*

| Environment           | Nij       | Ni         | Aij      | Mij | Mi | Bij      | IV ij     |
|-----------------------|-----------|------------|----------|-----|----|----------|-----------|
| Transitional          | 0         | 0.79093333 | 0.000000 | 0   | 2  | 0.000000 | 0.000000  |
| Inner Neritic (Fine S | 0         | 0.79093333 | 0.000000 | 0   | 1  | 0.000000 | 0.000000  |
| Inner Neritic (Silt)  | 0         | 0.79093333 | 0.000000 | 0   | 6  | 0.000000 | 0.000000  |
| Middle Neritic        | 0         | 0.79093333 | 0.000000 | 0   | 6  | 0.000000 | 0.000000  |
| Outer Neritic         | 0         | 0.79093333 | 0.000000 | 0   | 5  | 0.000000 | 0.000000  |
| Upper Bathyal         | 0         | 0.79093333 | 0.000000 | 0   | 6  | 0.000000 | 0.000000  |
| Lower Bathyal         | 0.7909333 | 0.79093333 | 1.000000 | 1   | 9  | 0.111111 | 11.111111 |

0.7909333

152 *Fissurina unguiculata*

| Environment           | Nij       | Ni         | Aij      | Mij | Mi | Bij      | IV ij     |
|-----------------------|-----------|------------|----------|-----|----|----------|-----------|
| Transitional          | 0         | 0.11111111 | 0.000000 | 0   | 2  | 0.000000 | 0.000000  |
| Inner Neritic (Fine S | 0         | 0.11111111 | 0.000000 | 0   | 1  | 0.000000 | 0.000000  |
| Inner Neritic (Silt)  | 0         | 0.11111111 | 0.000000 | 0   | 6  | 0.000000 | 0.000000  |
| Middle Neritic        | 0         | 0.11111111 | 0.000000 | 0   | 6  | 0.000000 | 0.000000  |
| Outer Neritic         | 0         | 0.11111111 | 0.000000 | 0   | 5  | 0.000000 | 0.000000  |
| Upper Bathyal         | 0         | 0.11111111 | 0.000000 | 0   | 6  | 0.000000 | 0.000000  |
| Lower Bathyal         | 0.1111111 | 0.11111111 | 1.000000 | 1   | 9  | 0.111111 | 11.111111 |

0.1111111

153 *Quinqueloculina sp.*

| Environment           | Nij       | Ni         | Aij      | Mij | Mi | Bij      | IV ij     |
|-----------------------|-----------|------------|----------|-----|----|----------|-----------|
| Transitional          | 136.088   | 689.957967 | 0.197241 | 2   | 2  | 1.000000 | 19.724100 |
| Inner Neritic (Fine S | 320.5632  | 689.957967 | 0.464613 | 1   | 1  | 1.000000 | 46.461265 |
| Inner Neritic (Silt)  | 173.78427 | 689.957967 | 0.251877 | 6   | 6  | 1.000000 | 25.187660 |
| Middle Neritic        | 6.2110333 | 689.957967 | 0.009002 | 4   | 6  | 0.666667 | 0.600136  |
| Outer Neritic         | 52.8512   | 689.957967 | 0.076601 | 2   | 5  | 0.400000 | 3.064024  |
| Upper Bathyal         | 0         | 689.957967 | 0.000000 | 0   | 6  | 0.000000 | 0.000000  |
| Lower Bathyal         | 0.4602667 | 689.957967 | 0.000667 | 1   | 9  | 0.111111 | 0.007412  |

689.95797

154 *Quinqueloculina granulocostata*

| Environment           | Nij       | Ni         | Aij      | Mij | Mi | Bij      | IV ij     |
|-----------------------|-----------|------------|----------|-----|----|----------|-----------|
| Transitional          | 144.0864  | 1520.21009 | 0.094781 | 1   | 2  | 0.500000 | 4.739029  |
| Inner Neritic (Fine S | 106.8544  | 1520.21009 | 0.070289 | 1   | 1  | 1.000000 | 7.028923  |
| Inner Neritic (Silt)  | 386.77307 | 1520.21009 | 0.254421 | 5   | 6  | 0.833333 | 21.201733 |
| Middle Neritic        | 86.3036   | 1520.21009 | 0.056771 | 6   | 6  | 1.000000 | 5.677084  |
| Outer Neritic         | 26.93076  | 1520.21009 | 0.017715 | 3   | 5  | 0.600000 | 1.062909  |
| Upper Bathyal         | 768.34133 | 1520.21009 | 0.505418 | 3   | 6  | 0.500000 | 25.270893 |
| Lower Bathyal         | 0.9205333 | 1520.21009 | 0.000606 | 1   | 9  | 0.111111 | 0.006728  |

1520.2101

155 *Quinqueloculina lamarckiana*

| Environment           | Nij       | Ni       | Aij      | Mij | Mi | Bij      | IV ij     |
|-----------------------|-----------|----------|----------|-----|----|----------|-----------|
| Transitional          | 0         | 862.4648 | 0.000000 | 0   | 2  | 0.000000 | 0.000000  |
| Inner Neritic (Fine S | 854.8352  | 862.4648 | 0.991154 | 1   | 1  | 1.000000 | 99.115373 |
| Inner Neritic (Silt)  | 7.4629333 | 862.4648 | 0.008653 | 2   | 6  | 0.333333 | 0.288434  |
| Middle Neritic        | 0         | 862.4648 | 0.000000 | 0   | 6  | 0.000000 | 0.000000  |
| Outer Neritic         | 0         | 862.4648 | 0.000000 | 0   | 5  | 0.000000 | 0.000000  |
| Upper Bathyal         | 0.1666667 | 862.4648 | 0.000193 | 1   | 6  | 0.166667 | 0.003221  |
| Lower Bathyal         | 0         | 862.4648 | 0.000000 | 0   | 9  | 0.000000 | 0.000000  |

862.4648

156 *Quinqueloculina crassicarinata*

| Environment           | Nij      | Ni        | Aij      | Mij | Mi | Bij      | IV ij     |
|-----------------------|----------|-----------|----------|-----|----|----------|-----------|
| Transitional          | 0        | 261.86656 | 0.000000 | 0   | 2  | 0.000000 | 0.000000  |
| Inner Neritic (Fine S | 213.7088 | 261.86656 | 0.816098 | 1   | 1  | 1.000000 | 81.609809 |
| Inner Neritic (Silt)  | 0        | 261.86656 | 0.000000 | 0   | 6  | 0.000000 | 0.000000  |
| Middle Neritic        | 0        | 261.86656 | 0.000000 | 0   | 6  | 0.000000 | 0.000000  |
| Outer Neritic         | 48.15776 | 261.86656 | 0.183902 | 3   | 5  | 0.600000 | 11.034114 |
| Upper Bathyal         | 0        | 261.86656 | 0.000000 | 0   | 6  | 0.000000 | 0.000000  |
| Lower Bathyal         | 0        | 261.86656 | 0.000000 | 0   | 9  | 0.000000 | 0.000000  |

261.86656

157 *Quinqueloculina angulariformis*

| Environment           | Nij       | Ni         | Aij      | Mij | Mi | Bij      | IV ij     |
|-----------------------|-----------|------------|----------|-----|----|----------|-----------|
| Transitional          | 0         | 35.6181333 | 0.000000 | 0   | 2  | 0.000000 | 0.000000  |
| Inner Neritic (Fine S | 35.618133 | 35.6181333 | 1.000000 | 1   | 3  | 0.333333 | 33.333333 |
| Inner Neritic (Silt)  | 0         | 35.6181333 | 0.000000 | 0   | 6  | 0.000000 | 0.000000  |
| Middle Neritic        | 0         | 35.6181333 | 0.000000 | 0   | 6  | 0.000000 | 0.000000  |
| Outer Neritic         | 0         | 35.6181333 | 0.000000 | 0   | 5  | 0.000000 | 0.000000  |
| Upper Bathyal         | 0         | 35.6181333 | 0.000000 | 0   | 6  | 0.000000 | 0.000000  |
| Lower Bathyal         | 0         | 35.6181333 | 0.000000 | 0   | 9  | 0.000000 | 0.000000  |

35.618133

158 *Quinqueloculina parkeri*

| Environment           | Nij       | Ni         | Aij      | Mij | Mi | Bij      | IV ij     |
|-----------------------|-----------|------------|----------|-----|----|----------|-----------|
| Transitional          | 0         | 106.969067 | 0.000000 | 0   | 2  | 0.000000 | 0.000000  |
| Inner Neritic (Fine S | 106.8544  | 106.969067 | 0.998928 | 1   | 1  | 1.000000 | 99.892804 |
| Inner Neritic (Silt)  | 0         | 106.969067 | 0.000000 | 0   | 6  | 0.000000 | 0.000000  |
| Middle Neritic        | 0.1146667 | 106.969067 | 0.001072 | 1   | 6  | 0.166667 | 0.017866  |
| Outer Neritic         | 0         | 106.969067 | 0.000000 | 0   | 5  | 0.000000 | 0.000000  |
| Upper Bathyal         | 0         | 106.969067 | 0.000000 | 0   | 6  | 0.000000 | 0.000000  |
| Lower Bathyal         | 0         | 106.969067 | 0.000000 | 0   | 9  | 0.000000 | 0.000000  |

106.96907

159 *Quinqueloculina strigillata*

| Environment           | Nij      | Ni       | Aij      | Mij | Mi | Bij      | IV ij     |
|-----------------------|----------|----------|----------|-----|----|----------|-----------|
| Transitional          | 0        | 107.0544 | 0.000000 | 0   | 2  | 0.000000 | 0.000000  |
| Inner Neritic (Fine S | 106.8544 | 107.0544 | 0.998132 | 1   | 1  | 1.000000 | 99.813179 |
| Inner Neritic (Silt)  | 0        | 107.0544 | 0.000000 | 0   | 6  | 0.000000 | 0.000000  |
| Middle Neritic        | 0        | 107.0544 | 0.000000 | 0   | 6  | 0.000000 | 0.000000  |
| Outer Neritic         | 0.2      | 107.0544 | 0.001868 | 1   | 5  | 0.200000 | 0.037364  |
| Upper Bathyal         | 0        | 107.0544 | 0.000000 | 0   | 6  | 0.000000 | 0.000000  |
| Lower Bathyal         | 0        | 107.0544 | 0.000000 | 0   | 9  | 0.000000 | 0.000000  |

107.0544

160 *Quinqueloculina philipinensis*

| Environment           | Nij       | Ni         | Aij      | Mij | Mi | Bij      | IV ij     |
|-----------------------|-----------|------------|----------|-----|----|----------|-----------|
| Transitional          | 0         | 116.919467 | 0.000000 | 0   | 2  | 0.000000 | 0.000000  |
| Inner Neritic (Fine S | 106.8544  | 116.919467 | 0.913915 | 1   | 1  | 1.000000 | 91.391453 |
| Inner Neritic (Silt)  | 6.8330667 | 116.919467 | 0.058443 | 1   | 6  | 0.166667 | 0.974042  |
| Middle Neritic        | 3.232     | 116.919467 | 0.027643 | 1   | 6  | 0.166667 | 0.460716  |
| Outer Neritic         | 0         | 116.919467 | 0.000000 | 0   | 5  | 0.000000 | 0.000000  |
| Upper Bathyal         | 0         | 116.919467 | 0.000000 | 0   | 6  | 0.000000 | 0.000000  |
| Lower Bathyal         | 0         | 116.919467 | 0.000000 | 0   | 9  | 0.000000 | 0.000000  |

116.91947

161 *Spiroloculina scrobiculata*

| Environment           | Nij      | Ni      | Aij      | Mij | Mi | Bij      | IV ij     |
|-----------------------|----------|---------|----------|-----|----|----------|-----------|
| Transitional          | 0        | 126.336 | 0.000000 | 0   | 2  | 0.000000 | 0.000000  |
| Inner Neritic (Fine S | 106.8544 | 126.336 | 0.845795 | 1   | 1  | 1.000000 | 84.579534 |
| Inner Neritic (Silt)  | 19.4816  | 126.336 | 0.154205 | 1   | 6  | 0.166667 | 2.570078  |
| Middle Neritic        | 0        | 126.336 | 0.000000 | 0   | 6  | 0.000000 | 0.000000  |
| Outer Neritic         | 0        | 126.336 | 0.000000 | 0   | 5  | 0.000000 | 0.000000  |
| Upper Bathyal         | 0        | 126.336 | 0.000000 | 0   | 6  | 0.000000 | 0.000000  |
| Lower Bathyal         | 0        | 126.336 | 0.000000 | 0   | 9  | 0.000000 | 0.000000  |

126.336

162 *Spiroloculina depressa*

| Environment           | Nij       | Ni         | Aij      | Mij | Mi | Bij      | IV ij     |
|-----------------------|-----------|------------|----------|-----|----|----------|-----------|
| Transitional          | 0         | 274.878667 | 0.000000 | 0   | 2  | 0.000000 | 0.000000  |
| Inner Neritic (Fine S | 106.8544  | 274.878667 | 0.388733 | 1   | 1  | 1.000000 | 38.873297 |
| Inner Neritic (Silt)  | 16.039467 | 274.878667 | 0.058351 | 2   | 6  | 0.333333 | 1.945036  |
| Middle Neritic        | 11.8296   | 274.878667 | 0.043036 | 4   | 6  | 0.666667 | 2.869048  |
| Outer Neritic         | 54.8048   | 274.878667 | 0.199378 | 4   | 5  | 0.800000 | 15.950252 |
| Upper Bathyal         | 85.3504   | 274.878667 | 0.310502 | 1   | 6  | 0.166667 | 5.175035  |
| Lower Bathyal         | 0         | 274.878667 | 0.000000 | 0   | 9  | 0.000000 | 0.000000  |

274.87867

163 *Triloculina trigonula*

| Environment           | Nij       | Ni         | Aij      | Mij | Mi | Bij      | IV ij     |
|-----------------------|-----------|------------|----------|-----|----|----------|-----------|
| Transitional          | 0         | 529.460307 | 0.000000 | 0   | 2  | 0.000000 | 0.000000  |
| Inner Neritic (Fine S | 213.7088  | 529.460307 | 0.403635 | 1   | 1  | 1.000000 | 40.363517 |
| Inner Neritic (Silt)  | 11.6304   | 529.460307 | 0.021967 | 2   | 6  | 0.333333 | 0.732217  |
| Middle Neritic        | 0.2388667 | 529.460307 | 0.000451 | 2   | 6  | 0.333333 | 0.015038  |
| Outer Neritic         | 47.83104  | 529.460307 | 0.090339 | 1   | 5  | 0.200000 | 1.806785  |
| Upper Bathyal         | 256.0512  | 529.460307 | 0.483608 | 1   | 6  | 0.166667 | 8.060132  |
| Lower Bathyal         | 0         | 529.460307 | 0.000000 | 0   | 9  | 0.000000 | 0.000000  |

529.46031

164 *Miliolinella subrotunda*

| Environment           | Nij     | Ni      | Aij      | Mij | Mi | Bij      | IV ij     |
|-----------------------|---------|---------|----------|-----|----|----------|-----------|
| Transitional          | 0       | 68.1856 | 0.000000 | 0   | 2  | 0.000000 | 0.000000  |
| Inner Neritic (Fine S | 0       | 68.1856 | 0.000000 | 0   | 1  | 0.000000 | 0.000000  |
| Inner Neritic (Silt)  | 68.1856 | 68.1856 | 1.000000 | 1   | 6  | 0.166667 | 16.666667 |
| Middle Neritic        | 0       | 68.1856 | 0.000000 | 0   | 6  | 0.000000 | 0.000000  |
| Outer Neritic         | 0       | 68.1856 | 0.000000 | 0   | 5  | 0.000000 | 0.000000  |
| Upper Bathyal         | 0       | 68.1856 | 0.000000 | 0   | 6  | 0.000000 | 0.000000  |
| Lower Bathyal         | 0       | 68.1856 | 0.000000 | 0   | 9  | 0.000000 | 0.000000  |

68.1856

165 *Edentostomina cultrata*

| Environment           | Nij       | Ni         | Aij      | Mij | Mi | Bij      | IV ij     |
|-----------------------|-----------|------------|----------|-----|----|----------|-----------|
| Transitional          | 0         | 20.1114667 | 0.000000 | 0   | 2  | 0.000000 | 0.000000  |
| Inner Neritic (Fine S | 0         | 20.1114667 | 0.000000 | 0   | 1  | 0.000000 | 0.000000  |
| Inner Neritic (Silt)  | 20.111467 | 20.1114667 | 1.000000 | 2   | 6  | 0.333333 | 33.333333 |
| Middle Neritic        | 0         | 20.1114667 | 0.000000 | 0   | 6  | 0.000000 | 0.000000  |
| Outer Neritic         | 0         | 20.1114667 | 0.000000 | 0   | 5  | 0.000000 | 0.000000  |
| Upper Bathyal         | 0         | 20.1114667 | 0.000000 | 0   | 6  | 0.000000 | 0.000000  |
| Lower Bathyal         | 0         | 20.1114667 | 0.000000 | 0   | 9  | 0.000000 | 0.000000  |

20.111467

166 *Quinqueloculina tropicalis*

| Environment           | Nij       | Ni         | Aij      | Mij | Mi | Bij      | IV ij     |
|-----------------------|-----------|------------|----------|-----|----|----------|-----------|
| Transitional          | 0         | 380.623447 | 0.000000 | 0   | 2  | 0.000000 | 0.000000  |
| Inner Neritic (Fine S | 0         | 380.623447 | 0.000000 | 0   | 1  | 0.000000 | 0.000000  |
| Inner Neritic (Silt)  | 19.4816   | 380.623447 | 0.051183 | 1   | 6  | 0.166667 | 0.853057  |
| Middle Neritic        | 15.2227   | 380.623447 | 0.039994 | 5   | 6  | 0.833333 | 3.332843  |
| Outer Neritic         | 4.34688   | 380.623447 | 0.011420 | 1   | 5  | 0.200000 | 0.228408  |
| Upper Bathyal         | 341.57227 | 380.623447 | 0.897402 | 2   | 6  | 0.333333 | 29.913402 |
| Lower Bathyal         | 0         | 380.623447 | 0.000000 | 0   | 9  | 0.000000 | 0.000000  |

380.62345

167 *Quinqueloculina bicornis*

| Environment           | Nij       | Ni         | Aij      | Mij | Mi | Bij      | IV ij     |
|-----------------------|-----------|------------|----------|-----|----|----------|-----------|
| Transitional          | 0         | 0.62986667 | 0.000000 | 0   | 2  | 0.000000 | 0.000000  |
| Inner Neritic (Fine S | 0         | 0.62986667 | 0.000000 | 0   | 1  | 0.000000 | 0.000000  |
| Inner Neritic (Silt)  | 0.6298667 | 0.62986667 | 1.000000 | 1   | 6  | 0.166667 | 16.666667 |
| Middle Neritic        | 0         | 0.62986667 | 0.000000 | 0   | 6  | 0.000000 | 0.000000  |
| Outer Neritic         | 0         | 0.62986667 | 0.000000 | 0   | 5  | 0.000000 | 0.000000  |
| Upper Bathyal         | 0         | 0.62986667 | 0.000000 | 0   | 6  | 0.000000 | 0.000000  |
| Lower Bathyal         | 0         | 0.62986667 | 0.000000 | 0   | 9  | 0.000000 | 0.000000  |

0.6298667

168 *Triloculina tricarinata*

| Environment           | Nij       | Ni        | Aij      | Mij | Mi | Bij      | IV ij     |
|-----------------------|-----------|-----------|----------|-----|----|----------|-----------|
| Transitional          | 0         | 246.89804 | 0.000000 | 0   | 2  | 0.000000 | 0.000000  |
| Inner Neritic (Fine S | 0         | 246.89804 | 0.000000 | 0   | 1  | 0.000000 | 0.000000  |
| Inner Neritic (Silt)  | 6.8330667 | 246.89804 | 0.027676 | 1   | 6  | 0.166667 | 0.461261  |
| Middle Neritic        | 14.2718   | 246.89804 | 0.057804 | 4   | 6  | 0.666667 | 3.853629  |
| Outer Neritic         | 55.05824  | 246.89804 | 0.223000 | 4   | 5  | 0.800000 | 17.839993 |
| Upper Bathyal         | 170.73493 | 246.89804 | 0.691520 | 1   | 6  | 0.166667 | 11.525333 |
| Lower Bathyal         | 0         | 246.89804 | 0.000000 | 0   | 9  | 0.000000 | 0.000000  |

246.89804

169 *Spiroloculina sp.*

| Environment           | Nij       | Ni         | Aij      | Mij | Mi | Bij      | IV ij    |
|-----------------------|-----------|------------|----------|-----|----|----------|----------|
| Transitional          | 0         | 146.064667 | 0.000000 | 0   | 2  | 0.000000 | 0.000000 |
| Inner Neritic (Fine S | 0         | 146.064667 | 0.000000 | 0   | 1  | 0.000000 | 0.000000 |
| Inner Neritic (Silt)  | 0         | 146.064667 | 0.000000 | 0   | 6  | 0.000000 | 0.000000 |
| Middle Neritic        | 3.7969333 | 146.064667 | 0.025995 | 4   | 6  | 0.666667 | 1.732992 |
| Outer Neritic         | 0         | 146.064667 | 0.000000 | 0   | 5  | 0.000000 | 0.000000 |
| Upper Bathyal         | 85.367467 | 146.064667 | 0.584450 | 1   | 6  | 0.166667 | 9.740830 |
| Lower Bathyal         | 56.900267 | 146.064667 | 0.389555 | 1   | 9  | 0.111111 | 4.328392 |

146.06467

170 *Quinqueloculina seminulum*

| Environment           | Nij       | Ni         | Aij      | Mij | Mi | Bij      | IV ij     |
|-----------------------|-----------|------------|----------|-----|----|----------|-----------|
| Transitional          | 0         | 14.2804667 | 0.000000 | 0   | 2  | 0.000000 | 0.000000  |
| Inner Neritic (Fine S | 0         | 14.2804667 | 0.000000 | 0   | 1  | 0.000000 | 0.000000  |
| Inner Neritic (Silt)  | 0         | 14.2804667 | 0.000000 | 0   | 6  | 0.000000 | 0.000000  |
| Middle Neritic        | 14.280467 | 14.2804667 | 1.000000 | 3   | 6  | 0.500000 | 50.000000 |
| Outer Neritic         | 0         | 14.2804667 | 0.000000 | 0   | 5  | 0.000000 | 0.000000  |
| Upper Bathyal         | 0         | 14.2804667 | 0.000000 | 0   | 6  | 0.000000 | 0.000000  |
| Lower Bathyal         | 0         | 14.2804667 | 0.000000 | 0   | 9  | 0.000000 | 0.000000  |

14.280467



171 *Quinqueloculina pulchella*

| Environment           | Nij       | Ni         | Aij      | Mij | Mi | Bij      | IV ij     |
|-----------------------|-----------|------------|----------|-----|----|----------|-----------|
| Transitional          | 0         | 0.16666667 | 0.000000 | 0   | 2  | 0.000000 | 0.000000  |
| Inner Neritic (Fine S | 0         | 0.16666667 | 0.000000 | 0   | 1  | 0.000000 | 0.000000  |
| Inner Neritic (Silt)  | 0         | 0.16666667 | 0.000000 | 0   | 6  | 0.000000 | 0.000000  |
| Middle Neritic        | 0.1666667 | 0.16666667 | 1.000000 | 1   | 6  | 0.166667 | 16.666667 |
| Outer Neritic         | 0         | 0.16666667 | 0.000000 | 0   | 5  | 0.000000 | 0.000000  |
| Upper Bathyal         | 0         | 0.16666667 | 0.000000 | 0   | 6  | 0.000000 | 0.000000  |
| Lower Bathyal         | 0         | 0.16666667 | 0.000000 | 0   | 9  | 0.000000 | 0.000000  |

0.1666667

172 *Quinqueloculina incisa*

| Environment           | Nij       | Ni         | Aij      | Mij | Mi | Bij      | IV ij     |
|-----------------------|-----------|------------|----------|-----|----|----------|-----------|
| Transitional          | 0         | 304.111573 | 0.000000 | 0   | 2  | 0.000000 | 0.000000  |
| Inner Neritic (Fine S | 0         | 304.111573 | 0.000000 | 0   | 1  | 0.000000 | 0.000000  |
| Inner Neritic (Silt)  | 0         | 304.111573 | 0.000000 | 0   | 6  | 0.000000 | 0.000000  |
| Middle Neritic        | 0.2293333 | 304.111573 | 0.000754 | 1   | 6  | 0.166667 | 0.012568  |
| Outer Neritic         | 47.83104  | 304.111573 | 0.157281 | 1   | 5  | 0.200000 | 3.145624  |
| Upper Bathyal         | 256.0512  | 304.111573 | 0.841965 | 1   | 6  | 0.166667 | 14.032744 |
| Lower Bathyal         | 0         | 304.111573 | 0.000000 | 0   | 9  | 0.000000 | 0.000000  |

304.11157

173 *Pyrgo depressa*

| Environment           | Nij       | Ni         | Aij      | Mij | Mi | Bij      | IV ij     |
|-----------------------|-----------|------------|----------|-----|----|----------|-----------|
| Transitional          | 0         | 85.5968889 | 0.000000 | 0   | 2  | 0.000000 | 0.000000  |
| Inner Neritic (Fine S | 0         | 85.5968889 | 0.000000 | 0   | 1  | 0.000000 | 0.000000  |
| Inner Neritic (Silt)  | 0         | 85.5968889 | 0.000000 | 0   | 6  | 0.000000 | 0.000000  |
| Middle Neritic        | 0.1146667 | 85.5968889 | 0.001340 | 1   | 6  | 0.166667 | 0.022327  |
| Outer Neritic         | 0         | 85.5968889 | 0.000000 | 0   | 5  | 0.000000 | 0.000000  |
| Upper Bathyal         | 85.3504   | 85.5968889 | 0.997120 | 1   | 6  | 0.166667 | 16.618673 |
| Lower Bathyal         | 0.1318222 | 85.5968889 | 0.001540 | 1   | 9  | 0.111111 | 0.017112  |

85.596889

174 *Pyrgo sp.*

| Environment           | Nij       | Ni         | Aij      | Mij | Mi | Bij      | IV ij     |
|-----------------------|-----------|------------|----------|-----|----|----------|-----------|
| Transitional          | 0         | 330.043289 | 0.000000 | 0   | 2  | 0.000000 | 0.000000  |
| Inner Neritic (Fine S | 0         | 330.043289 | 0.000000 | 0   | 1  | 0.000000 | 0.000000  |
| Inner Neritic (Silt)  | 0         | 330.043289 | 0.000000 | 0   | 6  | 0.000000 | 0.000000  |
| Middle Neritic        | 0.4346667 | 330.043289 | 0.001317 | 1   | 6  | 0.166667 | 0.021950  |
| Outer Neritic         | 0         | 330.043289 | 0.000000 | 0   | 5  | 0.000000 | 0.000000  |
| Upper Bathyal         | 298.91867 | 330.043289 | 0.905695 | 4   | 6  | 0.666667 | 60.379689 |
| Lower Bathyal         | 30.689956 | 330.043289 | 0.092988 | 3   | 9  | 0.333333 | 3.099589  |

330.04329

175 *Massilina sp.*

| Environment           | Nij      | Ni       | Aij      | Mij | Mi | Bij      | IV ij     |
|-----------------------|----------|----------|----------|-----|----|----------|-----------|
| Transitional          | 0        | 47.83104 | 0.000000 | 0   | 2  | 0.000000 | 0.000000  |
| Inner Neritic (Fine S | 0        | 47.83104 | 0.000000 | 0   | 1  | 0.000000 | 0.000000  |
| Inner Neritic (Silt)  | 0        | 47.83104 | 0.000000 | 0   | 6  | 0.000000 | 0.000000  |
| Middle Neritic        | 0        | 47.83104 | 0.000000 | 0   | 6  | 0.000000 | 0.000000  |
| Outer Neritic         | 47.83104 | 47.83104 | 1.000000 | 1   | 5  | 0.200000 | 20.000000 |
| Upper Bathyal         | 0        | 47.83104 | 0.000000 | 0   | 6  | 0.000000 | 0.000000  |
| Lower Bathyal         | 0        | 47.83104 | 0.000000 | 0   | 9  | 0.000000 | 0.000000  |

47.83104

176 *Pyrgo laevis*

| Environment           | Nij       | Ni         | Aij      | Mij | Mi | Bij      | IV ij     |
|-----------------------|-----------|------------|----------|-----|----|----------|-----------|
| Transitional          | 0         | 85.3674667 | 0.000000 | 0   | 2  | 0.000000 | 0.000000  |
| Inner Neritic (Fine S | 0         | 85.3674667 | 0.000000 | 0   | 1  | 0.000000 | 0.000000  |
| Inner Neritic (Silt)  | 0         | 85.3674667 | 0.000000 | 0   | 6  | 0.000000 | 0.000000  |
| Middle Neritic        | 0         | 85.3674667 | 0.000000 | 0   | 6  | 0.000000 | 0.000000  |
| Outer Neritic         | 0         | 85.3674667 | 0.000000 | 0   | 5  | 0.000000 | 0.000000  |
| Upper Bathyal         | 85.367467 | 85.3674667 | 1.000000 | 1   | 6  | 0.166667 | 16.666667 |
| Lower Bathyal         | 0         | 85.3674667 | 0.000000 | 0   | 9  | 0.000000 | 0.000000  |

85.367467

177 *Pyrgo denticulata*

| Environment           | Nij       | Ni         | Aij      | Mij | Mi | Bij      | IV ij     |
|-----------------------|-----------|------------|----------|-----|----|----------|-----------|
| Transitional          | 0         | 85.3674667 | 0.000000 | 0   | 2  | 0.000000 | 0.000000  |
| Inner Neritic (Fine S | 0         | 85.3674667 | 0.000000 | 0   | 1  | 0.000000 | 0.000000  |
| Inner Neritic (Silt)  | 0         | 85.3674667 | 0.000000 | 0   | 6  | 0.000000 | 0.000000  |
| Middle Neritic        | 0         | 85.3674667 | 0.000000 | 0   | 6  | 0.000000 | 0.000000  |
| Outer Neritic         | 0         | 85.3674667 | 0.000000 | 0   | 5  | 0.000000 | 0.000000  |
| Upper Bathyal         | 85.367467 | 85.3674667 | 1.000000 | 1   | 6  | 0.166667 | 16.666667 |
| Lower Bathyal         | 0         | 85.3674667 | 0.000000 | 0   | 9  | 0.000000 | 0.000000  |

85.367467

178 *Spiroloculina rotundata*

| Environment           | Nij      | Ni       | Aij      | Mij | Mi | Bij      | IV ij     |
|-----------------------|----------|----------|----------|-----|----|----------|-----------|
| Transitional          | 0        | 170.9056 | 0.000000 | 0   | 2  | 0.000000 | 0.000000  |
| Inner Neritic (Fine S | 0        | 170.9056 | 0.000000 | 0   | 1  | 0.000000 | 0.000000  |
| Inner Neritic (Silt)  | 0        | 170.9056 | 0.000000 | 0   | 6  | 0.000000 | 0.000000  |
| Middle Neritic        | 0        | 170.9056 | 0.000000 | 0   | 6  | 0.000000 | 0.000000  |
| Outer Neritic         | 0        | 170.9056 | 0.000000 | 0   | 5  | 0.000000 | 0.000000  |
| Upper Bathyal         | 0        | 170.9056 | 0.000000 | 0   | 6  | 0.000000 | 0.000000  |
| Lower Bathyal         | 170.9056 | 170.9056 | 1.000000 | 2   | 9  | 0.222222 | 22.222222 |

170.9056

179 *Ammobaculites agglutinans*

| Environment           | Nij       | Ni         | Aij      | Mij | Mi | Bij      | IV ij     |
|-----------------------|-----------|------------|----------|-----|----|----------|-----------|
| Transitional          | 0         | 537.818133 | 0.000000 | 0   | 2  | 0.000000 | 0.000000  |
| Inner Neritic (Fine S | 0         | 537.818133 | 0.000000 | 0   | 1  | 0.000000 | 0.000000  |
| Inner Neritic (Silt)  | 190.864   | 537.818133 | 0.354886 | 4   | 6  | 0.666667 | 23.659051 |
| Middle Neritic        | 5.5013333 | 537.818133 | 0.010229 | 2   | 6  | 0.333333 | 0.340966  |
| Outer Neritic         | 0         | 537.818133 | 0.000000 | 0   | 5  | 0.000000 | 0.000000  |
| Upper Bathyal         | 341.4528  | 537.818133 | 0.634885 | 2   | 6  | 0.333333 | 21.162842 |
| Lower Bathyal         | 0         | 537.818133 | 0.000000 | 0   | 9  | 0.000000 | 0.000000  |

537.81813

180 *Haplophragmoides sp.*

| Environment           | Nij       | Ni         | Aij      | Mij | Mi | Bij      | IV ij     |
|-----------------------|-----------|------------|----------|-----|----|----------|-----------|
| Transitional          | 0         | 124.509333 | 0.000000 | 0   | 2  | 0.000000 | 0.000000  |
| Inner Neritic (Fine S | 0         | 124.509333 | 0.000000 | 0   | 1  | 0.000000 | 0.000000  |
| Inner Neritic (Silt)  | 124.50933 | 124.509333 | 1.000000 | 4   | 6  | 0.666667 | 66.666667 |
| Middle Neritic        | 0         | 124.509333 | 0.000000 | 0   | 6  | 0.000000 | 0.000000  |
| Outer Neritic         | 0         | 124.509333 | 0.000000 | 0   | 5  | 0.000000 | 0.000000  |
| Upper Bathyal         | 0         | 124.509333 | 0.000000 | 0   | 6  | 0.000000 | 0.000000  |
| Lower Bathyal         | 0         | 124.509333 | 0.000000 | 0   | 9  | 0.000000 | 0.000000  |

124.50933

181 *Textularia sp.*

| Environment           | Nij       | Ni       | Aij      | Mij | Mi | Bij      | IV ij     |
|-----------------------|-----------|----------|----------|-----|----|----------|-----------|
| Transitional          | 0         | 220.7352 | 0.000000 | 0   | 2  | 0.000000 | 0.000000  |
| Inner Neritic (Fine S | 0         | 220.7352 | 0.000000 | 0   | 1  | 0.000000 | 0.000000  |
| Inner Neritic (Silt)  | 7.2653333 | 220.7352 | 0.032914 | 2   | 6  | 0.333333 | 1.097142  |
| Middle Neritic        | 0         | 220.7352 | 0.000000 | 0   | 6  | 0.000000 | 0.000000  |
| Outer Neritic         | 0         | 220.7352 | 0.000000 | 0   | 5  | 0.000000 | 0.000000  |
| Upper Bathyal         | 213.46987 | 220.7352 | 0.967086 | 3   | 6  | 0.500000 | 48.354288 |
| Lower Bathyal         | 0         | 220.7352 | 0.000000 | 0   | 9  | 0.000000 | 0.000000  |

220.7352

182 *Textularia tubulosa*

| Environment           | Nij       | Ni     | Aij      | Mij | Mi | Bij      | IV ij     |
|-----------------------|-----------|--------|----------|-----|----|----------|-----------|
| Transitional          | 0         | 7.0368 | 0.000000 | 0   | 2  | 0.000000 | 0.000000  |
| Inner Neritic (Fine S | 0         | 7.0368 | 0.000000 | 0   | 1  | 0.000000 | 0.000000  |
| Inner Neritic (Silt)  | 2.5765333 | 7.0368 | 0.366151 | 1   | 6  | 0.166667 | 6.102521  |
| Middle Neritic        | 4.4602667 | 7.0368 | 0.633849 | 2   | 6  | 0.333333 | 21.128291 |
| Outer Neritic         | 0         | 7.0368 | 0.000000 | 0   | 5  | 0.000000 | 0.000000  |
| Upper Bathyal         | 0         | 7.0368 | 0.000000 | 0   | 6  | 0.000000 | 0.000000  |
| Lower Bathyal         | 0         | 7.0368 | 0.000000 | 0   | 9  | 0.000000 | 0.000000  |

7.0368

183 *Textularia agglutinans*

| Environment           | Nij       | Ni         | Aij      | Mij | Mi | Bij      | IV ij     |
|-----------------------|-----------|------------|----------|-----|----|----------|-----------|
| Transitional          | 0         | 351.080413 | 0.000000 | 0   | 2  | 0.000000 | 0.000000  |
| Inner Neritic (Fine S | 0         | 351.080413 | 0.000000 | 0   | 1  | 0.000000 | 0.000000  |
| Inner Neritic (Silt)  | 22.611467 | 351.080413 | 0.064405 | 3   | 6  | 0.500000 | 3.220269  |
| Middle Neritic        | 2.1554    | 351.080413 | 0.006139 | 4   | 6  | 0.666667 | 0.409289  |
| Outer Neritic         | 198.04448 | 351.080413 | 0.564100 | 3   | 5  | 0.600000 | 33.846003 |
| Upper Bathyal         | 128.26907 | 351.080413 | 0.365355 | 3   | 6  | 0.500000 | 18.267762 |
| Lower Bathyal         | 0         | 351.080413 | 0.000000 | 0   | 9  | 0.000000 | 0.000000  |

351.08041

184 *Eggerella propinqua*

| Environment           | Nij       | Ni         | Aij      | Mij | Mi | Bij      | IV ij     |
|-----------------------|-----------|------------|----------|-----|----|----------|-----------|
| Transitional          | 0         | 57.0026667 | 0.000000 | 0   | 2  | 0.000000 | 0.000000  |
| Inner Neritic (Fine S | 0         | 57.0026667 | 0.000000 | 0   | 1  | 0.000000 | 0.000000  |
| Inner Neritic (Silt)  | 0         | 57.0026667 | 0.000000 | 0   | 6  | 0.000000 | 0.000000  |
| Middle Neritic        | 0         | 57.0026667 | 0.000000 | 0   | 6  | 0.000000 | 0.000000  |
| Outer Neritic         | 0         | 57.0026667 | 0.000000 | 0   | 5  | 0.000000 | 0.000000  |
| Upper Bathyal         | 0         | 57.0026667 | 0.000000 | 0   | 6  | 0.000000 | 0.000000  |
| Lower Bathyal         | 57.002667 | 57.0026667 | 1.000000 | 1   | 9  | 0.111111 | 11.111111 |

57.002667

185 *Martinotiella communis*

| Environment           | Nij       | Ni         | Aij      | Mij | Mi | Bij      | IV ij     |
|-----------------------|-----------|------------|----------|-----|----|----------|-----------|
| Transitional          | 0         | 57.7907556 | 0.000000 | 0   | 2  | 0.000000 | 0.000000  |
| Inner Neritic (Fine S | 0         | 57.7907556 | 0.000000 | 0   | 1  | 0.000000 | 0.000000  |
| Inner Neritic (Silt)  | 0         | 57.7907556 | 0.000000 | 0   | 6  | 0.000000 | 0.000000  |
| Middle Neritic        | 0         | 57.7907556 | 0.000000 | 0   | 6  | 0.000000 | 0.000000  |
| Outer Neritic         | 0         | 57.7907556 | 0.000000 | 0   | 5  | 0.000000 | 0.000000  |
| Upper Bathyal         | 0         | 57.7907556 | 0.000000 | 0   | 6  | 0.000000 | 0.000000  |
| Lower Bathyal         | 57.790756 | 57.7907556 | 1.000000 | 2   | 9  | 0.222222 | 22.222222 |

57.790756

## IndVal Result

| Total sampel                          | 2                    | 1                            | 6                       | 6                 | 5                | 6                | 9                | Max Environment           | IndVal Max (%) |
|---------------------------------------|----------------------|------------------------------|-------------------------|-------------------|------------------|------------------|------------------|---------------------------|----------------|
| Environment                           | Transitio<br>nal     | Inner Neritic<br>(Fine Sand) | Inner Neritic<br>(Silt) | Middle<br>Neritic | Outer<br>Neritic | Upper<br>Bathyal | Lower<br>Bathyal |                           |                |
| Variable                              | Indicator Value (IV) |                              |                         |                   |                  |                  |                  |                           |                |
| <i>Amphistegina sp.</i>               | 99.80                | 0.00                         | 0.00                    | 0.07              | 0.00             | 0.00             | 0.00             | Transitional              | 99.80          |
| <i>Amphistegina lessonii</i>          | 78.15                | 13.50                        | 1.23                    | 0.16              | 0.00             | 0.00             | 0.00             | Transitional              | 78.15          |
| <i>Sphaerogypsina sp.</i>             | 50.00                | 0.00                         | 0.00                    | 0.00              | 0.00             | 0.00             | 0.00             | Transitional              | 50.00          |
| <i>Calcarina calcarinoides</i>        | 50.00                | 0.00                         | 0.00                    | 0.00              | 0.00             | 0.00             | 0.00             | Transitional              | 50.00          |
| <i>Amphistegina radiata</i>           | 43.67                | 0.00                         | 0.00                    | 0.00              | 7.59             | 0.00             | 0.00             | Transitional              | 43.67          |
| <i>Quinqueloculina parkeri</i>        | 0.00                 | 99.89                        | 0.00                    | 0.02              | 0.00             | 0.00             | 0.00             | Inner Neritic (Fine Sand) | 99.89          |
| <i>Quinqueloculina strigillata</i>    | 0.00                 | 99.81                        | 0.00                    | 0.00              | 0.04             | 0.00             | 0.00             | Inner Neritic (Fine Sand) | 99.81          |
| <i>Quinqueloculina lamarckiana</i>    | 0.00                 | 99.12                        | 0.29                    | 0.00              | 0.00             | 0.00             | 0.00             | Inner Neritic (Fine Sand) | 99.12          |
| <i>Adelosina laevigata</i>            | 0.00                 | 98.93                        | 0.00                    | 0.36              | 0.00             | 0.00             | 0.00             | Inner Neritic (Fine Sand) | 98.93          |
| <i>Peneroplis pertusus</i>            | 0.92                 | 98.16                        | 0.00                    | 0.00              | 0.00             | 0.00             | 0.00             | Inner Neritic (Fine Sand) | 98.16          |
| <i>Ammonia sp.</i>                    | 1.26                 | 97.42                        | 0.13                    | 0.01              | 0.05             | 0.14             | 0.00             | Inner Neritic (Fine Sand) | 97.42          |
| <i>Asterorotalia trispinosa</i>       | 0.02                 | 96.97                        | 1.94                    | 0.04              | 0.00             | 0.00             | 0.00             | Inner Neritic (Fine Sand) | 96.97          |
| <i>Peneroplis carinatus</i>           | 0.45                 | 96.18                        | 0.49                    | 0.00              | 0.00             | 0.00             | 0.00             | Inner Neritic (Fine Sand) | 96.18          |
| <i>Elphidium hispidulum</i>           | 0.04                 | 95.14                        | 3.12                    | 0.04              | 0.00             | 0.00             | 0.00             | Inner Neritic (Fine Sand) | 95.14          |
| <i>Ammonia gaimardii</i>              | 0.00                 | 94.88                        | 0.00                    | 0.29              | 2.73             | 0.00             | 0.00             | Inner Neritic (Fine Sand) | 94.88          |
| <i>Quinqueloculina philipinensis</i>  | 0.00                 | 91.39                        | 0.97                    | 0.46              | 0.00             | 0.00             | 0.00             | Inner Neritic (Fine Sand) | 91.39          |
| <i>Peneroplis planatus</i>            | 0.84                 | 90.10                        | 1.37                    | 0.00              | 0.00             | 0.00             | 0.00             | Inner Neritic (Fine Sand) | 90.10          |
| <i>Elphidium neosimplex</i>           | 0.00                 | 86.02                        | 4.26                    | 0.24              | 0.00             | 1.15             | 0.00             | Inner Neritic (Fine Sand) | 86.02          |
| <i>Operculina philippinensis</i>      | 0.00                 | 85.74                        | 0.00                    | 2.38              | 0.00             | 0.00             | 0.00             | Inner Neritic (Fine Sand) | 85.74          |
| <i>Spiroloculina scrobiculata</i>     | 0.00                 | 84.58                        | 2.57                    | 0.00              | 0.00             | 0.00             | 0.00             | Inner Neritic (Fine Sand) | 84.58          |
| <i>Quinqueloculina crassicarinata</i> | 0.00                 | 81.61                        | 0.00                    | 0.00              | 11.03            | 0.00             | 0.00             | Inner Neritic (Fine Sand) | 81.61          |
| <i>Ammonia beccarii</i>               | 1.19                 | 56.86                        | 29.79                   | 0.40              | 0.77             | 0.00             | 0.00             | Inner Neritic (Fine Sand) | 56.86          |
| <i>Pseudorotalia sp.</i>              | 0.04                 | 56.78                        | 3.87                    | 1.72              | 19.67            | 0.00             | 0.00             | Inner Neritic (Fine Sand) | 56.78          |
| <i>Quinqueloculina sp.</i>            | 19.72                | 46.46                        | 25.19                   | 0.60              | 3.06             | 0.00             | 0.01             | Inner Neritic (Fine Sand) | 46.46          |
| <i>Baggina indica</i>                 | 0.00                 | 45.43                        | 0.00                    | 0.02              | 0.00             | 18.15            | 0.00             | Inner Neritic (Fine Sand) | 45.43          |
| <i>Cellanthus craticulatus</i>        | 13.96                | 45.16                        | 0.00                    | 0.08              | 8.09             | 0.00             | 0.00             | Inner Neritic (Fine Sand) | 45.16          |
| <i>Triloculina trigonula</i>          | 0.00                 | 40.36                        | 0.73                    | 0.02              | 1.81             | 8.06             | 0.00             | Inner Neritic (Fine Sand) | 40.36          |
| <i>Spiroloculina depressa</i>         | 0.00                 | 38.87                        | 1.95                    | 2.87              | 15.95            | 5.18             | 0.00             | Inner Neritic (Fine Sand) | 38.87          |
| <i>Elphidium crispum</i>              | 6.09                 | 35.14                        | 24.86                   | 0.51              | 0.29             | 0.00             | 0.00             | Inner Neritic (Fine Sand) | 35.14          |
| <i>Quinqueloculina angulariformis</i> | 0.00                 | 33.33                        | 0.00                    | 0.00              | 0.00             | 0.00             | 0.00             | Inner Neritic (Fine Sand) | 33.33          |
| <i>Operculina sp.</i>                 | 0.00                 | 32.17                        | 0.05                    | 1.37              | 12.96            | 0.00             | 0.00             | Inner Neritic (Fine Sand) | 32.17          |
| <i>Haplophragmoides sp.</i>           | 0.00                 | 0.00                         | 66.67                   | 0.00              | 0.00             | 0.00             | 0.00             | Inner Neritic (Silt)      | 66.67          |
| <i>Florilus boueanum</i>              | 0.00                 | 0.00                         | 65.90                   | 0.19              | 0.00             | 0.00             | 0.00             | Inner Neritic (Silt)      | 65.90          |
| <i>Ammonia tepida</i>                 | 0.00                 | 34.16                        | 65.35                   | 0.24              | 0.08             | 0.00             | 0.00             | Inner Neritic (Silt)      | 65.35          |
| <i>Elphidium sp.</i>                  | 2.50                 | 36.77                        | 38.73                   | 0.09              | 0.00             | 0.00             | 0.00             | Inner Neritic (Silt)      | 38.73          |
| <i>Edentostomina cultrata</i>         | 0.00                 | 0.00                         | 33.33                   | 0.00              | 0.00             | 0.00             | 0.00             | Inner Neritic (Silt)      | 33.33          |
| <i>Nodosaria lepidula</i>             | 0.00                 | 0.00                         | 27.39                   | 22.61             | 0.00             | 0.00             | 0.00             | Inner Neritic (Silt)      | 27.39          |
| <i>Ammobaculites agglutinans</i>      | 0.00                 | 0.00                         | 23.66                   | 0.34              | 0.00             | 21.16            | 0.00             | Inner Neritic (Silt)      | 23.66          |
| <i>Oridorsalis tenera</i>             | 0.00                 | 0.00                         | 16.67                   | 0.00              | 0.00             | 0.00             | 0.00             | Inner Neritic (Silt)      | 16.67          |
| <i>Siphogenerina striata</i>          | 0.00                 | 0.00                         | 16.67                   | 0.00              | 0.00             | 0.00             | 0.00             | Inner Neritic (Silt)      | 16.67          |
| <i>Miliolinella subrotunda</i>        | 0.00                 | 0.00                         | 16.67                   | 0.00              | 0.00             | 0.00             | 0.00             | Inner Neritic (Silt)      | 16.67          |
| <i>Quinqueloculina bicornis</i>       | 0.00                 | 0.00                         | 16.67                   | 0.00              | 0.00             | 0.00             | 0.00             | Inner Neritic (Silt)      | 16.67          |
| <i>Bulimina gibba</i>                 | 0.00                 | 0.00                         | 16.44                   | 0.00              | 0.00             | 0.00             | 0.15             | Inner Neritic (Silt)      | 16.44          |
| <i>Operculina subgranulosa</i>        | 0.00                 | 0.00                         | 15.85                   | 0.56              | 0.00             | 0.26             | 0.00             | Inner Neritic (Silt)      | 15.85          |
| <i>Anomalina globulosus</i>           | 0.00                 | 0.00                         | 14.62                   | 0.13              | 0.32             | 9.05             | 0.00             | Inner Neritic (Silt)      | 14.62          |
| <i>Cibicides refulgens</i>            | 0.00                 | 0.00                         | 13.41                   | 6.51              | 0.00             | 0.00             | 0.00             | Inner Neritic (Silt)      | 13.41          |
| <i>Fissurina sp.</i>                  | 0.00                 | 0.00                         | 10.30                   | 2.73              | 0.00             | 0.00             | 2.43             | Inner Neritic (Silt)      | 10.30          |
| <i>Quinqueloculina seminulum</i>      | 0.00                 | 0.00                         | 0.00                    | 50.00             | 0.00             | 0.00             | 0.00             | Middle Neritic            | 50.00          |
| <i>Discorbis sp.</i>                  | 0.00                 | 0.00                         | 0.00                    | 33.33             | 0.00             | 0.00             | 0.00             | Middle Neritic            | 33.33          |
| <i>Bombulina echinata</i>             | 0.00                 | 0.00                         | 0.00                    | 33.33             | 0.00             | 0.00             | 0.00             | Middle Neritic            | 33.33          |
| <i>Nonionella simplex</i>             | 0.00                 | 0.00                         | 0.00                    | 33.33             | 0.00             | 0.00             | 0.00             | Middle Neritic            | 33.33          |
| <i>Textularia tubulosa</i>            | 0.00                 | 0.00                         | 6.10                    | 21.13             | 0.00             | 0.00             | 0.00             | Middle Neritic            | 21.13          |
| <i>Operculina complanata</i>          | 0.00                 | 0.00                         | 0.00                    | 16.67             | 0.00             | 0.00             | 0.00             | Middle Neritic            | 16.67          |
| <i>Amphistegina quoyii</i>            | 0.00                 | 0.00                         | 0.00                    | 16.67             | 0.00             | 0.00             | 0.00             | Middle Neritic            | 16.67          |
| <i>Alveolinella quoyii</i>            | 0.00                 | 0.00                         | 0.00                    | 16.67             | 0.00             | 0.00             | 0.00             | Middle Neritic            | 16.67          |
| <i>Siphonaperta sp.</i>               | 0.00                 | 0.00                         | 0.00                    | 16.67             | 0.00             | 0.00             | 0.00             | Middle Neritic            | 16.67          |
| <i>Elphidium advenum</i>              | 0.00                 | 0.00                         | 0.00                    | 16.67             | 0.00             | 0.00             | 0.00             | Middle Neritic            | 16.67          |
| <i>Asterorotalia sp.</i>              | 0.00                 | 0.00                         | 0.00                    | 16.67             | 0.00             | 0.00             | 0.00             | Middle Neritic            | 16.67          |
| <i>Baculogypsinoidea spinosus</i>     | 0.00                 | 0.00                         | 0.00                    | 16.67             | 0.00             | 0.00             | 0.00             | Middle Neritic            | 16.67          |
| <i>Planorbulinella larvata</i>        | 0.00                 | 0.00                         | 0.00                    | 16.67             | 0.00             | 0.00             | 0.00             | Middle Neritic            | 16.67          |
| <i>Lenticulina vortex</i>             | 0.00                 | 0.00                         | 0.00                    | 16.67             | 0.00             | 0.00             | 0.00             | Middle Neritic            | 16.67          |
| <i>Astacolus crepidulus</i>           | 0.00                 | 0.00                         | 0.00                    | 16.67             | 0.00             | 0.00             | 0.00             | Middle Neritic            | 16.67          |
| <i>Glandulina laevigata</i>           | 0.00                 | 0.00                         | 0.00                    | 16.67             | 0.00             | 0.00             | 0.00             | Middle Neritic            | 16.67          |
| <i>Guttulina problema</i>             | 0.00                 | 0.00                         | 0.00                    | 16.67             | 0.00             | 0.00             | 0.00             | Middle Neritic            | 16.67          |
| <i>Brizalina alata</i>                | 0.00                 | 0.00                         | 0.00                    | 16.67             | 0.00             | 0.00             | 0.00             | Middle Neritic            | 16.67          |
| <i>Nodosaria catesbyi</i>             | 0.00                 | 0.00                         | 0.00                    | 16.67             | 0.00             | 0.00             | 0.00             | Middle Neritic            | 16.67          |
| <i>Quinqueloculina pulchella</i>      | 0.00                 | 0.00                         | 0.00                    | 16.67             | 0.00             | 0.00             | 0.00             | Middle Neritic            | 16.67          |
| <i>Planularia australis</i>           | 0.00                 | 0.00                         | 0.00                    | 12.90             | 4.51             | 0.00             | 0.00             | Middle Neritic            | 12.90          |
| <i>Siphogenerina tropica</i>          | 0.00                 | 0.00                         | 0.00                    | 12.05             | 0.00             | 4.62             | 0.00             | Middle Neritic            | 12.05          |
| <i>Nodosaria albatrossi</i>           | 0.00                 | 0.00                         | 0.00                    | 11.24             | 3.93             | 2.15             | 0.00             | Middle Neritic            | 11.24          |

## IndVal Result

| Total sampel                   | 2                    | 1                            | 6                       | 6                 | 5                | 6                | 9                | Max Environment | IndVal Max (%) |
|--------------------------------|----------------------|------------------------------|-------------------------|-------------------|------------------|------------------|------------------|-----------------|----------------|
| Environment                    | Transitio<br>nal     | Inner Neritic<br>(Fine Sand) | Inner Neritic<br>(Silt) | Middle<br>Neritic | Outer<br>Neritic | Upper<br>Bathyal | Lower<br>Bathyal |                 |                |
| Variable                       | Indicator Value (IV) |                              |                         |                   |                  |                  |                  |                 |                |
| Brizalina aenariensis          | 0.00                 | 0.00                         | 1.07                    | 0.26              | 70.77            | 9.12             | 0.00             | Outer Neritic   | 70.77          |
| Nonion scaphum                 | 0.00                 | 0.00                         | 0.00                    | 19.00             | 61.76            | 0.00             | 0.00             | Outer Neritic   | 61.76          |
| Gyroidina broeckhiana          | 0.00                 | 0.00                         | 0.00                    | 0.05              | 52.09            | 2.14             | 0.00             | Outer Neritic   | 52.09          |
| Operculina ammonoides          | 0.00                 | 13.38                        | 0.20                    | 0.76              | 50.33            | 0.00             | 0.00             | Outer Neritic   | 50.33          |
| Lagena sulcata                 | 0.00                 | 0.00                         | 0.70                    | 13.76             | 45.08            | 0.00             | 0.00             | Outer Neritic   | 45.08          |
| Virgulina pauciloculata        | 0.00                 | 0.00                         | 0.00                    | 0.00              | 37.81            | 0.00             | 0.61             | Outer Neritic   | 37.81          |
| Cibicides sp.                  | 0.00                 | 17.79                        | 2.68                    | 2.02              | 36.74            | 18.53            | 11.46            | Outer Neritic   | 36.74          |
| Brizalina earlandi             | 0.00                 | 0.00                         | 0.00                    | 0.35              | 36.70            | 3.78             | 1.68             | Outer Neritic   | 36.70          |
| Brizalina striatula            | 0.00                 | 0.00                         | 0.00                    | 0.20              | 34.88            | 27.90            | 0.00             | Outer Neritic   | 34.88          |
| Textularia agglutinans         | 0.00                 | 0.00                         | 3.22                    | 0.41              | 33.85            | 18.27            | 0.00             | Outer Neritic   | 33.85          |
| Neouvirgerina ampullacea       | 0.00                 | 0.00                         | 0.00                    | 0.56              | 21.58            | 10.56            | 0.00             | Outer Neritic   | 21.58          |
| Cassidulina laevigata          | 0.00                 | 0.00                         | 0.00                    | 0.00              | 21.14            | 15.72            | 0.00             | Outer Neritic   | 21.14          |
| Amphistegina papillosa         | 18.41                | 8.33                         | 0.36                    | 0.16              | 20.89            | 0.00             | 0.00             | Outer Neritic   | 20.89          |
| Heterolepa subhaidingeri       | 0.00                 | 0.00                         | 0.00                    | 0.00              | 20.00            | 0.00             | 0.00             | Outer Neritic   | 20.00          |
| Nonion subturgidum             | 0.00                 | 0.00                         | 0.00                    | 0.00              | 20.00            | 0.00             | 0.00             | Outer Neritic   | 20.00          |
| Siphogenerina sp.              | 0.00                 | 0.00                         | 0.00                    | 0.00              | 20.00            | 0.00             | 0.00             | Outer Neritic   | 20.00          |
| Massilina sp.                  | 0.00                 | 0.00                         | 0.00                    | 0.00              | 20.00            | 0.00             | 0.00             | Outer Neritic   | 20.00          |
| Siphonina tubulosa             | 0.00                 | 0.00                         | 0.00                    | 0.04              | 19.95            | 0.00             | 0.00             | Outer Neritic   | 19.95          |
| Calcarina splengeri            | 0.00                 | 0.00                         | 0.00                    | 0.41              | 19.75            | 0.00             | 0.00             | Outer Neritic   | 19.75          |
| Bolivina sp.                   | 0.00                 | 0.00                         | 0.46                    | 0.01              | 19.44            | 0.00             | 0.00             | Outer Neritic   | 19.44          |
| Siphonina bradyi               | 0.00                 | 0.00                         | 0.63                    | 0.00              | 19.18            | 0.06             | 0.00             | Outer Neritic   | 19.18          |
| Trifarina bradyi               | 0.00                 | 0.00                         | 0.00                    | 0.00              | 18.58            | 1.19             | 0.00             | Outer Neritic   | 18.58          |
| Triloculina tricarinata        | 0.00                 | 0.00                         | 0.46                    | 3.85              | 17.84            | 11.53            | 0.00             | Outer Neritic   | 17.84          |
| Eponides schreibersi           | 0.00                 | 0.00                         | 0.00                    | 4.76              | 14.29            | 0.00             | 0.00             | Outer Neritic   | 14.29          |
| Lagena substriata              | 0.00                 | 0.00                         | 0.00                    | 11.05             | 13.37            | 0.00             | 0.00             | Outer Neritic   | 13.37          |
| Reussella simplex              | 0.20                 | 0.00                         | 4.05                    | 0.00              | 11.47            | 11.38            | 0.00             | Outer Neritic   | 11.47          |
| Uvirgerina schwageri           | 0.00                 | 0.00                         | 0.00                    | 0.00              | 9.13             | 0.01             | 6.03             | Outer Neritic   | 9.13           |
| Bulimina marginata             | 0.00                 | 0.00                         | 3.06                    | 0.03              | 0.48             | 63.78            | 14.71            | Upper Bathyal   | 63.78          |
| Oolina globosa                 | 0.00                 | 0.00                         | 2.98                    | 0.12              | 0.00             | 61.45            | 0.33             | Upper Bathyal   | 61.45          |
| Uvirgerina asperula            | 0.00                 | 0.00                         | 0.00                    | 0.00              | 0.00             | 60.87            | 1.93             | Upper Bathyal   | 60.87          |
| Pyrgo sp.                      | 0.00                 | 0.00                         | 0.00                    | 0.02              | 0.00             | 60.38            | 3.10             | Upper Bathyal   | 60.38          |
| Rectobolivina bifrons          | 0.00                 | 0.00                         | 0.00                    | 0.00              | 0.00             | 58.82            | 1.31             | Upper Bathyal   | 58.82          |
| Eponides sp.                   | 0.00                 | 0.00                         | 0.00                    | 0.00              | 0.01             | 49.97            | 0.00             | Upper Bathyal   | 49.97          |
| Gyroidina neosoldanii          | 0.00                 | 0.00                         | 0.00                    | 0.01              | 0.01             | 49.86            | 0.02             | Upper Bathyal   | 49.86          |
| Saracenaria italica            | 0.00                 | 0.00                         | 0.00                    | 0.04              | 0.01             | 49.84            | 0.00             | Upper Bathyal   | 49.84          |
| Textularia sp.                 | 0.00                 | 0.00                         | 1.10                    | 0.00              | 0.00             | 48.35            | 0.00             | Upper Bathyal   | 48.35          |
| Lenticulina orbicularis        | 0.00                 | 0.00                         | 0.00                    | 0.02              | 6.40             | 47.48            | 11.63            | Upper Bathyal   | 47.48          |
| Hyalinea bhaltica              | 0.00                 | 0.00                         | 0.03                    | 0.02              | 0.00             | 46.36            | 0.78             | Upper Bathyal   | 46.36          |
| Bolivinita quadrilatera        | 0.00                 | 0.00                         | 0.01                    | 0.00              | 0.00             | 40.48            | 8.71             | Upper Bathyal   | 40.48          |
| Lenticulina sp.                | 0.00                 | 0.00                         | 0.00                    | 0.01              | 1.15             | 39.22            | 8.71             | Upper Bathyal   | 39.22          |
| Dentalina sp.                  | 0.00                 | 0.00                         | 0.00                    | 0.00              | 0.00             | 38.56            | 2.54             | Upper Bathyal   | 38.56          |
| Brizalina robusta              | 0.00                 | 0.00                         | 4.89                    | 0.14              | 20.03            | 37.08            | 5.24             | Upper Bathyal   | 37.08          |
| Sigmoilopsis schlumbergeri     | 0.00                 | 0.00                         | 0.00                    | 0.00              | 0.00             | 33.33            | 0.00             | Upper Bathyal   | 33.33          |
| Ammonia supera                 | 0.00                 | 0.00                         | 0.00                    | 0.00              | 0.00             | 33.33            | 0.00             | Upper Bathyal   | 33.33          |
| Lenticulina calcar             | 0.00                 | 0.00                         | 0.00                    | 0.03              | 0.01             | 33.26            | 0.00             | Upper Bathyal   | 33.26          |
| Pullenia subcarinata           | 0.00                 | 0.00                         | 0.00                    | 0.00              | 0.00             | 32.73            | 0.60             | Upper Bathyal   | 32.73          |
| Cassidulina sp.                | 0.00                 | 0.00                         | 0.05                    | 0.00              | 1.33             | 32.12            | 0.00             | Upper Bathyal   | 32.12          |
| Nodosaria sp.                  | 0.00                 | 0.00                         | 0.46                    | 0.16              | 3.45             | 30.64            | 0.05             | Upper Bathyal   | 30.64          |
| Quinqueloculina tropicalis     | 0.00                 | 0.00                         | 0.85                    | 3.33              | 0.23             | 29.91            | 0.00             | Upper Bathyal   | 29.91          |
| Neouvirgerina sp.              | 0.00                 | 0.00                         | 0.00                    | 0.00              | 3.81             | 29.55            | 0.20             | Upper Bathyal   | 29.55          |
| Bulimina sp.                   | 0.00                 | 0.00                         | 2.25                    | 0.09              | 0.01             | 29.35            | 4.18             | Upper Bathyal   | 29.35          |
| Heterolepa praecincta          | 0.00                 | 0.00                         | 0.00                    | 0.23              | 7.02             | 26.76            | 11.36            | Upper Bathyal   | 26.76          |
| Quinqueloculina granulocostata | 4.74                 | 7.03                         | 21.20                   | 5.68              | 1.06             | 25.27            | 0.01             | Upper Bathyal   | 25.27          |
| Dentalina communis             | 0.00                 | 0.00                         | 0.00                    | 0.00              | 0.06             | 23.92            | 23.05            | Upper Bathyal   | 23.92          |
| Hoeglundina elegans            | 0.00                 | 0.00                         | 0.00                    | 0.00              | 0.11             | 23.59            | 15.94            | Upper Bathyal   | 23.59          |
| Siphogenerina dimorpha         | 0.00                 | 0.00                         | 0.00                    | 0.00              | 0.00             | 23.07            | 3.42             | Upper Bathyal   | 23.07          |
| Fissurina ampullacea           | 0.00                 | 0.00                         | 11.83                   | 1.40              | 0.00             | 20.54            | 0.01             | Upper Bathyal   | 20.54          |
| Globocassidulina sp.           | 0.00                 | 0.00                         | 0.00                    | 0.00              | 0.00             | 19.99            | 13.34            | Upper Bathyal   | 19.99          |
| Brizalina sp.                  | 0.00                 | 0.00                         | 7.08                    | 0.24              | 0.00             | 19.95            | 13.93            | Upper Bathyal   | 19.95          |
| Planulina ariminensis          | 0.00                 | 0.00                         | 0.00                    | 0.00              | 0.00             | 18.91            | 6.91             | Upper Bathyal   | 18.91          |
| Lingulina galapagoensis        | 0.00                 | 0.00                         | 0.00                    | 0.00              | 0.00             | 16.67            | 0.00             | Upper Bathyal   | 16.67          |
| Discorbina orbicularis         | 0.00                 | 0.00                         | 0.00                    | 0.00              | 0.00             | 16.67            | 0.00             | Upper Bathyal   | 16.67          |
| Planularia gemmata             | 0.00                 | 0.00                         | 0.00                    | 0.00              | 0.00             | 16.67            | 0.00             | Upper Bathyal   | 16.67          |
| Hemirobulina galapagoensis     | 0.00                 | 0.00                         | 0.00                    | 0.00              | 0.00             | 16.67            | 0.00             | Upper Bathyal   | 16.67          |
| Siphogenerina collumelaris     | 0.00                 | 0.00                         | 0.00                    | 0.00              | 0.00             | 16.67            | 0.00             | Upper Bathyal   | 16.67          |
| Siphonina sp.                  | 0.00                 | 0.00                         | 0.00                    | 0.00              | 0.00             | 16.67            | 0.00             | Upper Bathyal   | 16.67          |
| Bolivinita subangularis        | 0.00                 | 0.00                         | 0.00                    | 0.00              | 0.00             | 16.67            | 0.00             | Upper Bathyal   | 16.67          |
| Astacolus insolitus            | 0.00                 | 0.00                         | 0.00                    | 0.00              | 0.00             | 16.67            | 0.00             | Upper Bathyal   | 16.67          |
| Bolivina hantkeniana           | 0.00                 | 0.00                         | 0.00                    | 0.00              | 0.00             | 16.67            | 0.00             | Upper Bathyal   | 16.67          |
| Bigenerina nodosaria           | 0.00                 | 0.00                         | 0.00                    | 0.00              | 0.00             | 16.67            | 0.00             | Upper Bathyal   | 16.67          |

## IndVal Result

| Total sampel                      | 2                    | 1                            | 6                       | 6                 | 5                | 6                | 9                | Max Environment | IndVal Max (%) |
|-----------------------------------|----------------------|------------------------------|-------------------------|-------------------|------------------|------------------|------------------|-----------------|----------------|
| Environment                       | Transitio<br>nal     | Inner Neritic<br>(Fine Sand) | Inner Neritic<br>(Silt) | Middle<br>Neritic | Outer<br>Neritic | Upper<br>Bathyal | Lower<br>Bathyal |                 |                |
| Variable                          | Indicator Value (IV) |                              |                         |                   |                  |                  |                  |                 |                |
| <i>Pyrgo lucernula</i>            | 0.00                 | 0.00                         | 0.00                    | 0.00              | 0.00             | 16.67            | 0.00             | Upper Bathyal   | 16.67          |
| <i>Pyrgo laevis</i>               | 0.00                 | 0.00                         | 0.00                    | 0.00              | 0.00             | 16.67            | 0.00             | Upper Bathyal   | 16.67          |
| <i>Pyrgo denticulata</i>          | 0.00                 | 0.00                         | 0.00                    | 0.00              | 0.00             | 16.67            | 0.00             | Upper Bathyal   | 16.67          |
| <i>Pyrgo depressa</i>             | 0.00                 | 0.00                         | 0.00                    | 0.02              | 0.00             | 16.62            | 0.02             | Upper Bathyal   | 16.62          |
| <i>Oolina striata</i>             | 0.00                 | 0.00                         | 0.00                    | 0.52              | 0.00             | 16.40            | 0.00             | Upper Bathyal   | 16.40          |
| <i>Cassidulina pacifica</i>       | 0.00                 | 0.00                         | 0.49                    | 0.00              | 0.00             | 16.18            | 0.00             | Upper Bathyal   | 16.18          |
| <i>Vulvulina pennatula</i>        | 0.00                 | 0.00                         | 0.00                    | 0.10              | 0.00             | 16.04            | 5.70             | Upper Bathyal   | 16.04          |
| <i>Lagena laevis</i>              | 0.00                 | 0.00                         | 0.32                    | 0.59              | 0.28             | 15.91            | 0.00             | Upper Bathyal   | 15.91          |
| <i>Lagena semilineata</i>         | 0.00                 | 0.00                         | 0.63                    | 0.45              | 0.00             | 15.49            | 0.22             | Upper Bathyal   | 15.49          |
| <i>Anomalina sp.</i>              | 0.00                 | 0.00                         | 2.75                    | 0.08              | 0.00             | 15.21            | 0.00             | Upper Bathyal   | 15.21          |
| <i>Quinqueloculina incisa</i>     | 0.00                 | 0.00                         | 0.00                    | 0.01              | 3.15             | 14.03            | 0.00             | Upper Bathyal   | 14.03          |
| <i>Lenticulina peregrina</i>      | 0.00                 | 0.00                         | 0.00                    | 0.00              | 0.01             | 12.49            | 2.78             | Upper Bathyal   | 12.49          |
| <i>Sphaeroidina bulloides</i>     | 0.00                 | 0.00                         | 0.05                    | 0.15              | 0.00             | 12.38            | 5.56             | Upper Bathyal   | 12.38          |
| <i>Ceratobulimina contraria</i>   | 0.00                 | 0.00                         | 0.00                    | 0.00              | 0.00             | 11.91            | 3.17             | Upper Bathyal   | 11.91          |
| <i>Globobulimina notovata</i>     | 0.00                 | 0.00                         | 0.00                    | 0.00              | 0.00             | 11.09            | 7.44             | Upper Bathyal   | 11.09          |
| <i>Planularia sp.</i>             | 0.00                 | 0.00                         | 0.00                    | 0.00              | 0.30             | 9.85             | 4.38             | Upper Bathyal   | 9.85           |
| <i>Spiroloculina sp.</i>          | 0.00                 | 0.00                         | 0.00                    | 1.73              | 0.00             | 9.74             | 4.33             | Upper Bathyal   | 9.74           |
| <i>Planulina sp.</i>              | 0.00                 | 0.00                         | 0.00                    | 0.00              | 0.00             | 0.00             | 44.44            | Lower Bathyal   | 44.44          |
| <i>Anomalina colligera</i>        | 0.00                 | 0.00                         | 0.01                    | 0.02              | 0.05             | 19.34            | 40.63            | Lower Bathyal   | 40.63          |
| <i>Uvigerina peregrina</i>        | 0.00                 | 0.00                         | 0.00                    | 0.00              | 0.00             | 30.15            | 36.51            | Lower Bathyal   | 36.51          |
| <i>Lagena hispidula</i>           | 0.00                 | 0.00                         | 0.00                    | 0.00              | 0.00             | 0.00             | 33.33            | Lower Bathyal   | 33.33          |
| <i>Globobulimina pacifica</i>     | 0.00                 | 0.00                         | 0.00                    | 0.00              | 0.00             | 5.47             | 29.86            | Lower Bathyal   | 29.86          |
| <i>Uvigerina sp.</i>              | 0.00                 | 0.00                         | 0.03                    | 0.00              | 0.01             | 17.87            | 28.48            | Lower Bathyal   | 28.48          |
| <i>Lagena sp.</i>                 | 0.00                 | 0.00                         | 0.00                    | 0.00              | 0.00             | 0.00             | 22.22            | Lower Bathyal   | 22.22          |
| <i>Spiroloculina rotundata</i>    | 0.00                 | 0.00                         | 0.00                    | 0.00              | 0.00             | 0.00             | 22.22            | Lower Bathyal   | 22.22          |
| <i>Martinotiella communis</i>     | 0.00                 | 0.00                         | 0.00                    | 0.00              | 0.00             | 0.00             | 22.22            | Lower Bathyal   | 22.22          |
| <i>Oridorsalis umbonatus</i>      | 0.00                 | 0.00                         | 0.00                    | 0.00              | 0.00             | 9.97             | 17.86            | Lower Bathyal   | 17.86          |
| <i>Amphicoryna sp.</i>            | 0.00                 | 0.00                         | 0.00                    | 0.00              | 0.00             | 0.00             | 11.11            | Lower Bathyal   | 11.11          |
| <i>Marginulina obesa</i>          | 0.00                 | 0.00                         | 0.00                    | 0.00              | 0.00             | 0.00             | 11.11            | Lower Bathyal   | 11.11          |
| <i>Ceratocancris clifdenensis</i> | 0.00                 | 0.00                         | 0.00                    | 0.00              | 0.00             | 0.00             | 11.11            | Lower Bathyal   | 11.11          |
| <i>Astacolus sp.</i>              | 0.00                 | 0.00                         | 0.00                    | 0.00              | 0.00             | 0.00             | 11.11            | Lower Bathyal   | 11.11          |
| <i>Lenticulina iota</i>           | 0.00                 | 0.00                         | 0.00                    | 0.00              | 0.00             | 0.00             | 11.11            | Lower Bathyal   | 11.11          |
| <i>Amphicoryna hirsuta</i>        | 0.00                 | 0.00                         | 0.00                    | 0.00              | 0.00             | 0.00             | 11.11            | Lower Bathyal   | 11.11          |
| <i>Laticarinina pauperata</i>     | 0.00                 | 0.00                         | 0.00                    | 0.00              | 0.00             | 0.00             | 11.11            | Lower Bathyal   | 11.11          |
| <i>Nodosaria flintii</i>          | 0.00                 | 0.00                         | 0.00                    | 0.00              | 0.00             | 0.00             | 11.11            | Lower Bathyal   | 11.11          |
| <i>Planulina wuellerstorfi</i>    | 0.00                 | 0.00                         | 0.00                    | 0.00              | 0.00             | 0.00             | 11.11            | Lower Bathyal   | 11.11          |
| <i>Bulimina aculeata</i>          | 0.00                 | 0.00                         | 0.00                    | 0.00              | 0.00             | 0.00             | 11.11            | Lower Bathyal   | 11.11          |
| <i>Fissurina unguiculata</i>      | 0.00                 | 0.00                         | 0.00                    | 0.00              | 0.00             | 0.00             | 11.11            | Lower Bathyal   | 11.11          |
| <i>Eggerella propinqua</i>        | 0.00                 | 0.00                         | 0.00                    | 0.00              | 0.00             | 0.00             | 11.11            | Lower Bathyal   | 11.11          |
| <i>Nodosaria radricula</i>        | 0.00                 | 0.00                         | 0.00                    | 0.00              | 0.04             | 0.00             | 11.09            | Lower Bathyal   | 11.09          |
| <i>Vaginulina sp.</i>             | 0.00                 | 0.00                         | 0.00                    | 0.00              | 0.23             | 0.00             | 11.05            | Lower Bathyal   | 11.05          |
| <i>Cancris auriculus</i>          | 0.00                 | 0.00                         | 0.00                    | 0.66              | 0.00             | 0.00             | 10.96            | Lower Bathyal   | 10.96          |
| <i>Amphicoryna separans</i>       | 0.00                 | 0.00                         | 0.00                    | 0.00              | 0.73             | 0.00             | 10.67            | Lower Bathyal   | 10.67          |
| <i>Amphicoryna scalaris</i>       | 0.00                 | 0.00                         | 0.00                    | 0.02              | 3.66             | 0.00             | 10.59            | Lower Bathyal   | 10.59          |
| <i>Eponides procera</i>           | 0.00                 | 0.00                         | 0.00                    | 0.00              | 2.42             | 0.00             | 9.77             | Lower Bathyal   | 9.77           |
