# Supplementary material
Source: Copernicus journal article supplement (doi:10.5194/jm-45-487-2026)
Supplement: Supplementary file [file jm-45-487-2026-supplement-title-page.pdf › jm-45-487-2026-supplement-title-page.pdf]

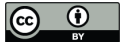

## *Supplement of*

# **Benthic foraminiferal assemblages as proxies for paleoenvironmental indicators in the Indo-Pacific (Indonesia)**

**Ria Fitriany et al.**

*Correspondence to:* Khoiril Anwar Maryunani ([khoiril.anwar.m@itb.ac.id](mailto:khoiril.anwar.m@itb.ac.id))

- [jm-45-487-2026-supplement-title-page.pdf](#)
- [Document S1.pdf](#)
- [Table S1.pdf](#)
- [Table S2.pdf](#)
- [Table S3.pdf](#)

The copyright of individual parts of the supplement might differ from the article licence.
